# Supplementary material for: A water-promoted catalytic hydrodecarboxylation of conjugated carboxylic acids under open air conditions at room temperature
Source: Royal Society of Chemistry journal article supplement (doi:10.1039/d3gc00351e), 2023-01-01
Supplement: d3gc00351e1.pdf [file d3gc00351e1.pdf]

## *Supporting Information*

### Water-promoted catalytic hydrodecarboxylation of conjugated carboxylic acids under open air conditions at room temperature

Zhan-Yong Wang,<sup>a</sup> Ting Yang,<sup>b</sup> Kai-Kai Wang,<sup>a</sup> Dong-Fang Liu,<sup>c</sup> Xueji Ma,<sup>a</sup> Nan Wang,<sup>a</sup> Hong Liu,<sup>a</sup>

Aili Sun <sup>a</sup> and Hongxin Liu\*<sup>d,e</sup>

<sup>a</sup>*School of Pharmacy, Xinxiang University, Xinxiang 453003, P.R. of China*

<sup>b</sup>*School of Nursing, Xinxiang University, Xinxiang 453003, P.R. of China*

<sup>c</sup>*Xinxiang Runyu Material Co., Ltd., Xinxiang 453003, China*

<sup>d</sup>*College of Chemistry and Materials Engineering, Wenzhou University, Wenzhou 325035, China*

<sup>e</sup>*Institute of New Materials & Industrial Technology, Wenzhou University, Wenzhou 325035, China*

### **Table of contents**

|                                                                                                                                                                                    |           |
|------------------------------------------------------------------------------------------------------------------------------------------------------------------------------------|-----------|
| <b>1. General Information</b> .....                                                                                                                                                | <b>2</b>  |
| <b>2. Experimental Section</b> .....                                                                                                                                               | <b>2</b>  |
| <b>3. The data of the products 1d, 1i, 1o, 2, 4, 6a, 2a'</b> .....                                                                                                                 | <b>3</b>  |
| <b>4. Reference</b> .....                                                                                                                                                          | <b>11</b> |
| <b>5 The NMR of 1d, 1i, 1o, 2, 4, 6a, 2a'</b> .....                                                                                                                                | <b>13</b> |
| <b>6 Scanned copies of 1H-NMR, for 2H-chromen-2-one (2a) (isolated from the experiment carried out in the presence of TEMPO, BHT, p-benzoquinone as a radical scavenger)</b> ..... | <b>50</b> |

## 1. General Information

Unless otherwise stated, all reactions were carried out in anhydrous solvent and commercially available reagents were used as received. 1,8-Diazabicyclo[5.4.0]-7-Undecene (DBU, 98%) and *N,N'*-Carbonyldiimidazole (CDI, 98%) were purchased from Adamas and used as received. Anhydrous THF and MTBE were distilled from sodium and benzophenone, CH<sub>3</sub>CN, CCl<sub>4</sub>, EA and acetone were distilled from CaH<sub>2</sub>. Dichloromethane (DCM) (Water ≤ 50 ppm (by K.F.), 99.9%, SafeDry, with molecular sieves, Safeseal), *N,N*-dimethylformamide (DMF) (Water ≤ 50 ppm (by K.F.), 99.8%, SafeDry, with molecular sieves, Safeseal), dimethyl sulfoxide (DMSO) (Water ≤ 50 ppm (by K.F.), 99.7%, SafeDry, with molecular sieves, Safeseal), 1,4-dioxane (Water ≤ 50 ppm (by K.F.), 99.8%, SafeDry, with molecular sieves, Safeseal), were all purchased from Adamas. NMR spectra were obtained in CDCl<sub>3</sub> or DMSO-d<sub>6</sub> using TMS as the internal standard at 400 (for <sup>1</sup>H NMR) or 100 MHz (for <sup>13</sup>C NMR), respectively. <sup>1</sup>H NMR spectra: J-values are reported in Hz. HRMS (m/z) were recorded on Thermo Scientific™ Q Exactive. Flash column chromatography was performed using Huanghai silica gel (300-400). The 2-Hydroxy-benzaldehydes were synthesized from the corresponding Phenols and Paraformaldehyde according to the literatures.<sup>1</sup> Coumarin-3-carboxylic acids **1** were synthesized according to the literatures.<sup>2</sup> The α,β-unsaturated carboxylic acids (**3a-3c**) were synthesized according to the literatures.<sup>3</sup> 4-Methyl-2-oxo-2H-chromene-3-carboxylic acid **5a** was synthesized according to the literatures.<sup>4</sup>

## 2. Experimental Section

### General procedure for the hydrodecarboxylation of conjugated carboxylic acids (**1**, **3**)

Conjugated carboxylic acids (**1**, **3**) (0.3 mmol), CDI (0.36 mmol) were successively added into a 10 ml reaction tube, then dry anisole (2 ml) and water (16 μl) were added with stirring. The mixture was stirred in open air for 5 min and then DABCO (0.06 mmol) was added. The resulting mixture was continuously stirred at rt. After completion, the products (**2**, **4**) were obtained by flash column chromatography on a short packed silica gel column eluting with petroleum ether/EtOAc (3:1).

### A typical procedure for the preparation of coumarin-3-carboxylic anhydride 6a.

Under standard conditions, coumarin-3-carboxylic acids **1a** (0.3 mmol), CDI (0.36 mmol) were successively added into a 10 ml reaction tube, then dry anisole (2 ml) and water (16  $\mu$ l) were added with stirring, the mixture was stirred in open air for 5 min. The precipitates were formed and collected by filtration and wash with anisole to give the product **6a** (88.5mg, 98% yield).

### Deuterization experiment of the hydrodecarboxylation of coumarin-3-carboxylic acid

Under N<sub>2</sub> atmosphere, coumarin-3-carboxylic acids **1a** (0.3 mmol), CDI (0.36 mmol) were successively added into a 10 ml reaction tube, then dry anisole (2 ml) and D<sub>2</sub>O (16  $\mu$ l) were added with stirring. The mixture was stirred in open air for 5 min and then DABCO (0.06 mmol) was added. The resulting mixture was continuously stirred at rt. After completion, the products **2a'** was obtained by flash column chromatography on a short packed silica gel column eluting with petroleum ether/EtOAc (3:1).

### 3. The data of the products 1d, 1i, 1o, 2, 4, 6a, 2a'

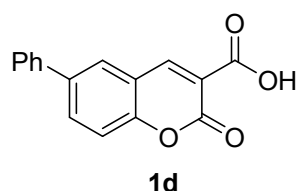

**2-oxo-6-phenyl-2H-chromene-3-carboxylic acid 1d:** yellow solid, mp 208-209 °C, <sup>1</sup>H NMR (400 MHz, DMSO)  $\delta$  8.77 (s, 1H), 8.21 (s, 1H), 8.01 (d,  $J$  = 8.1 Hz, 1H), 7.71 (d,  $J$  = 7.5 Hz, 2H), 7.55 – 7.45 (m, 3H), 7.41 (t,  $J$  = 7.3 Hz, 1H); <sup>13</sup>C NMR (100 MHz, DMSO)  $\delta$  164.5, 157.1, 154.3, 148.7, 138.8, 137.1, 132.9, 129.6, 128.3, 127.2, 119.3, 118.8, 117.1. HRMS (FTMS-ESI): [M + H]<sup>+</sup> calcd for C<sub>16</sub>H<sub>11</sub>O<sub>4</sub><sup>+</sup>: 267.0657; found: 267.0648.

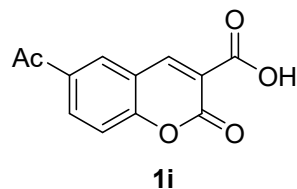

**6-acetyl-2-oxo-2H-chromene-3-carboxylic acid 1i:** white solid, mp 253-254 °C, <sup>1</sup>H NMR (400 MHz, DMSO)  $\delta$  13.37 (s, 1H), 8.82 (s, 1H), 8.57 (s, 1H), 8.24 (d,  $J$  = 8.7 Hz, 1H), 7.53 (d,  $J$  = 8.7 Hz, 1H), 2.63 (s, 3H); <sup>13</sup>C NMR (100 MHz, DMSO)  $\delta$  196.7, 164.2, 157.7, 156.5, 148.6, 133.8, 133.7, 131.6, 119.7, 118.3, 117.1, 27.2. HRMS (FTMS-ESI): [M + H]<sup>+</sup> calcd for C<sub>12</sub>H<sub>9</sub>O<sub>5</sub><sup>+</sup>: 233.0450; found: 233.0443.

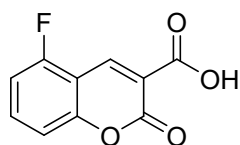

**1o**

**5-fluoro-2-oxo-2H-chromene-3-carboxylic acid 1o**: white solid, mp 177-178 °C,  $^1\text{H}$  NMR (400 MHz, DMSO)  $\delta$  13.44 (s, 1H), 8.56 (s, 1H), 7.75 (dd,  $J = 15.2, 7.9$  Hz, 1H), 7.32 – 7.23 (m, 2H);  $^{13}\text{C}$  NMR (100 MHz, DMSO)  $\delta$  164.0, 159.0 (d,  $J = 254$  Hz), 156.2, 155.3 (d,  $J = 4.6$  Hz), 140.6 (d,  $J = 3.8$  Hz), 135.6 (d,  $J = 10.1$  Hz), 119.3, 113.0 (d,  $J = 3.7$  Hz), 111.1 (d,  $J = 19.4$  Hz), 108.4 (d,  $J = 19.0$  Hz). HRMS (FTMS-ESI):  $[\text{M} + \text{H}]^+$  calcd for  $\text{C}_{10}\text{H}_6\text{FO}_4^+$ : 209.0250; found: 209.0242.

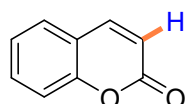

**2a**

**2H-chromen-2-one 2a**<sup>5</sup>: white solid, 99%,  $^1\text{H}$  NMR (400 MHz,  $\text{CDCl}_3$ )  $\delta$  7.72 (d,  $J = 9.5$  Hz, 1H), 7.60 – 7.45 (m, 2H), 7.34 (d,  $J = 8.3$  Hz, 1H), 7.31 – 7.27 (m, 1H), 6.43 (d,  $J = 9.5$  Hz, 1H);  $^{13}\text{C}$  NMR (100 MHz,  $\text{CDCl}_3$ )  $\delta$  160.8, 154.1, 143.4, 131.9, 127.9, 124.4, 118.9, 116.9, 116.7.

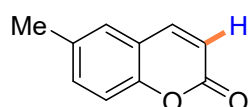

**2b**

**6-methyl-2H-chromen-2-one 2b**<sup>5</sup>: white solid, 96%,  $^1\text{H}$  NMR (400 MHz,  $\text{CDCl}_3$ )  $\delta$  7.65 (d,  $J = 9.5$  Hz, 1H), 7.33 (d,  $J = 8.4$  Hz, 1H), 7.27 (s, 1H), 7.21 (d,  $J = 8.4$  Hz, 1H), 6.39 (d,  $J = 9.5$  Hz, 1H), 2.40 (s, 3H);  $^{13}\text{C}$  NMR (101 MHz,  $\text{CDCl}_3$ )  $\delta$  161.0, 152.2, 143.4, 134.1, 132.8, 127.7, 118.6, 116.5, 20.7.

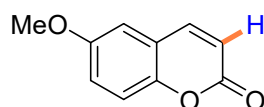

**2c**

**6-methoxy-2H-chromen-2-one 2c**<sup>5</sup>: white solid, 99%,  $^1\text{H}$  NMR (400 MHz,  $\text{CDCl}_3$ )  $\delta$  7.66 (d,  $J = 9.5$  Hz, 1H), 7.26 (d,  $J = 9.1$  Hz, 1H), 7.11 (d,  $J = 9.0$  Hz, 1H), 6.92 (s, 1H), 6.42 (d,  $J = 9.5$  Hz, 1H), 3.85 (s, 3H);  $^{13}\text{C}$  NMR (100 MHz,  $\text{CDCl}_3$ )  $\delta$  161.0, 156.1, 148.5, 143.2, 119.5, 119.2, 117.9, 117.1, 110.0, 55.9.

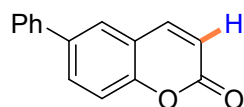

**2d**

**6-phenyl-2H-chromen-2-one 2d**<sup>7</sup>: white solid, 90%,  $^1\text{H}$  NMR (400 MHz,  $\text{CDCl}_3$ )  $\delta$  7.73 (t,  $J = 8.0$  Hz, 2H), 7.65 (s, 1H), 7.56 (d,  $J = 7.7$  Hz, 2H), 7.46 (t,  $J = 7.4$  Hz, 2H), 7.37 (t,  $J = 8.7$  Hz, 2H), 6.44 (d,  $J = 9.5$  Hz, 1H);  $^{13}\text{C}$  NMR (100 MHz,  $\text{CDCl}_3$ )  $\delta$  160.7, 153.4, 143.5, 139.4, 137.8, 130.7, 129.1, 127.8, 127.1, 126.1, 119.1, 117.3, 117.0.

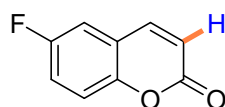

**2e**

**6-fluoro-2H-chromen-2-one 2e**<sup>8</sup>: white solid, 86%, <sup>1</sup>H NMR (400 MHz, CDCl<sub>3</sub>) δ 7.66 (d, *J* = 9.5 Hz, 1H), 7.48 (s, 2H), 7.28 (d, *J* = 9.0 Hz, 1H), 6.47 (d, *J* = 9.5 Hz, 1H); <sup>13</sup>C NMR (100 MHz, CDCl<sub>3</sub>) δ 160.0, 152.4, 142.2, 131.8, 129.7, 127.2, 119.8, 118.3, 117.8.

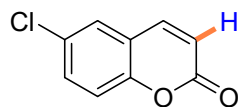

**2f**

**6-chloro-2H-chromen-2-one 2f**<sup>6</sup>: white solid, 98%, <sup>1</sup>H NMR (400 MHz, CDCl<sub>3</sub>) δ 7.66 (d, *J* = 9.6 Hz, 1H), 7.47 (d, *J* = 6.9 Hz, 2H), 7.28 (t, *J* = 7.5 Hz, 1H), 6.47 (d, *J* = 9.6 Hz, 1H); <sup>13</sup>C NMR (100 MHz, CDCl<sub>3</sub>) δ 160.0, 152.4, 142.3, 131.7, 129.7, 127.2, 119.8, 118.3, 117.8.

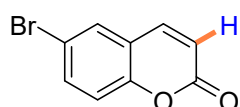

**2g**

**6-bromo-2H-chromen-2-one 2g**<sup>5</sup>: white solid, 89%, <sup>1</sup>H NMR (400 MHz, CDCl<sub>3</sub>) δ 8.49 – 8.35 (m, 2H), 7.82 (d, *J* = 9.6 Hz, 1H), 7.48 (d, *J* = 9.0 Hz, 1H), 6.60 (d, *J* = 9.7 Hz, 1H); <sup>13</sup>C NMR (100 MHz, CDCl<sub>3</sub>) δ 158.8, 157.6, 144.1, 142.2, 126.6, 123.8, 118.9, 118.8, 118.1.

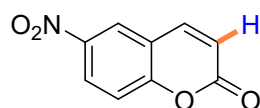

**2h**

**6-nitro-2H-chromen-2-one 2h**<sup>5</sup>: pale yellow solid, 63%, <sup>1</sup>H NMR (400 MHz, CDCl<sub>3</sub>) δ 7.72 – 7.57 (m, 3H), 7.22 (d, *J* = 8.5 Hz, 1H), 6.47 (d, *J* = 9.6 Hz, 1H); <sup>13</sup>C NMR (100 MHz, CDCl<sub>3</sub>) δ 160.0, 152.9, 142.1, 134.6, 130.2, 120.3, 118.7, 117.9, 117.0.

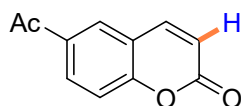

**2i**

**6-acetyl-2H-chromen-2-one 2i**<sup>5</sup>: white solid, 99%, <sup>1</sup>H NMR (400 MHz, CDCl<sub>3</sub>) δ 8.13 (s, 2H), 7.80 (d, *J* = 9.6 Hz, 1H), 7.40 (d, *J* = 9.0 Hz, 1H), 6.50 (d, *J* = 9.6 Hz, 1H), 2.66 (s, 3H); <sup>13</sup>C NMR (100 MHz, CDCl<sub>3</sub>) δ 196.0, 159.8, 156.9, 143.2, 133.5, 131.7, 128.6, 118.6, 117.6, 117.3, 26.6.

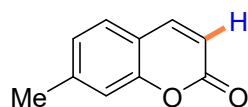

**2j**

**7-methyl-2H-chromen-2-one 2j**<sup>7</sup>: white solid, 96%, <sup>1</sup>H NMR (400 MHz, CDCl<sub>3</sub>) δ 7.67 (d, *J* = 9.5 Hz, 1H), 7.36 (d, *J* = 7.8 Hz, 1H), 7.23 – 7.04 (m, 2H), 6.35 (d, *J* = 9.5 Hz, 1H), 2.45 (s, 3H); <sup>13</sup>C NMR (101 MHz, CDCl<sub>3</sub>) δ 161.1, 154.2, 143.4, 143.1, 127.5, 125.6, 117.1, 116.5, 115.4, 21.8.

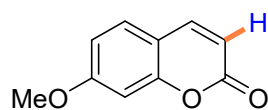

**2k**

**7-methoxy-2H-chromen-2-one 2k**<sup>6</sup>: white solid, 89%, <sup>1</sup>H NMR (400 MHz, CDCl<sub>3</sub>) δ 7.64 (d, *J* = 9.5 Hz, 1H), 7.38 (d, *J* = 8.5 Hz, 1H), 6.89 – 6.77 (m, 2H), 6.25 (d, *J* = 9.5 Hz, 1H), 3.87 (s, 3H); <sup>13</sup>C NMR (100 MHz, CDCl<sub>3</sub>) δ 162.9, 161.2, 155.9, 143.5, 128.8, 113.1, 112.6, 112.5, 100.9, 55.8.

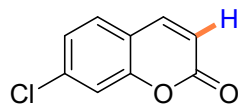

**2l**

**7-chloro-2H-chromen-2-one 2l**<sup>6</sup>: white solid, 78%, <sup>1</sup>H NMR (400 MHz, CDCl<sub>3</sub>) δ 7.65 (d, *J* = 9.6 Hz, 1H), 7.48 (d, *J* = 6.6 Hz, 2H), 7.28 (d, *J* = 10.1 Hz, 1H), 6.47 (d, *J* = 9.6 Hz, 1H); <sup>13</sup>C NMR (100 MHz, CDCl<sub>3</sub>) δ 160.0, 152.5, 142.2, 131.8, 129.7, 127.1, 119.8, 118.4, 117.9.

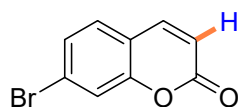

**2m**

**7-bromo-2H-chromen-2-one 2m**<sup>6</sup>: white solid, 74%, <sup>1</sup>H NMR (400 MHz, CDCl<sub>3</sub>) δ 7.63 (t, *J* = 7.5 Hz, 3H), 7.25 (d, *J* = 11.0 Hz, 1H), 6.47 (d, *J* = 9.6 Hz, 1H); <sup>13</sup>C NMR (100 MHz, CDCl<sub>3</sub>) δ 160.0, 153.0, 142.1, 134.6, 130.2, 120.3, 118.7, 117.9, 117.0.

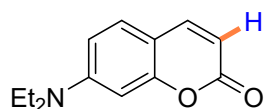

**2n**

**7-(diethylamino)-2H-chromen-2-one 2n**<sup>9</sup>: red solid, 83%, <sup>1</sup>H NMR (400 MHz, CDCl<sub>3</sub>) δ 7.55 (d, *J* = 9.3 Hz, 1H), 7.26 (d, *J* = 8.7 Hz, 1H), 6.58 (d, *J* = 8.8 Hz, 1H), 6.51 (s, 1H), 6.05 (d, *J* = 9.3 Hz, 1H), 3.43 (q, *J* = 7.0 Hz, 4H), 1.23 (t, *J* = 7.1 Hz, 6H); <sup>13</sup>C NMR (100 MHz, CDCl<sub>3</sub>) δ 162.3, 156.8, 150.7, 143.7, 128.8, 109.2, 108.7, 108.3, 97.5, 44.8, 12.4.

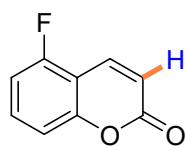

**2o**

**5-fluoro-2H-chromen-2-one 2o**<sup>6</sup>: white solid, 99%, <sup>1</sup>H NMR (400 MHz, CDCl<sub>3</sub>) δ 7.95 (d, *J* = 9.7 Hz, 1H), 7.49 (dd, *J* = 15.0, 7.9 Hz, 1H), 7.14 (d, *J* = 8.5 Hz, 1H), 7.00 (t, *J* = 8.7 Hz, 1H), 6.46 (d, *J* = 9.7 Hz, 1H); <sup>13</sup>C NMR (100 MHz, CDCl<sub>3</sub>) δ 159.8 (d, *J* = 7.3 Hz), 157.3, 154.7 (d, *J* = 5.1 Hz), 136.3 (d, *J* = 4.1 Hz), 132.2 (d, *J* = 9.6 Hz), 116.8 (d, *J* = 1.6 Hz), 112.7 (d, *J* = 4.0 Hz), 110.3 (d, *J* = 20.0 Hz), 109.0 (d, *J* = 19.2 Hz).

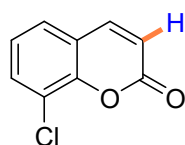

**2p**

**8-chloro-2H-chromen-2-one 2p**<sup>6</sup>: white solid, 90%, <sup>1</sup>H NMR (400 MHz, CDCl<sub>3</sub>) δ 7.71 (d, *J* = 9.6 Hz, 1H), 7.59 (d, *J* = 7.9 Hz, 1H), 7.41 (d, *J* = 7.7 Hz, 1H), 7.23 (t, *J* = 7.8 Hz, 1H), 6.47 (d, *J* = 9.6 Hz, 1H); <sup>13</sup>C NMR (100 MHz, CDCl<sub>3</sub>) δ 159.5, 149.8, 143.1, 132.3, 126.4, 124.7, 121.8, 120.1, 117.4.

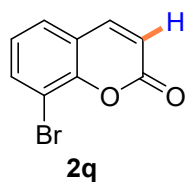

**8-bromo-2H-chromen-2-one 2q**<sup>6</sup>: white solid, 98%, <sup>1</sup>H NMR (400 MHz, CDCl<sub>3</sub>) δ 7.76 (d, *J* = 7.9 Hz, 1H), 7.70 (d, *J* = 9.5 Hz, 1H), 7.46 (d, *J* = 7.7 Hz, 1H), 7.17 (t, *J* = 7.8 Hz, 1H), 6.45 (d, *J* = 9.5 Hz, 1H); <sup>13</sup>C NMR (100 MHz, CDCl<sub>3</sub>) δ 159.7, 150.8, 143.2, 135.4, 127.2, 125.2, 120.1, 117.3, 110.4.

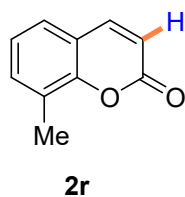

**8-methyl-2H-chromen-2-one 2r**<sup>7</sup>: white solid, 75%, <sup>1</sup>H NMR (400 MHz, CDCl<sub>3</sub>) δ 7.70 (d, *J* = 9.5 Hz, 1H), 7.38 (d, *J* = 7.3 Hz, 1H), 7.32 (d, *J* = 7.6 Hz, 1H), 7.18 (t, *J* = 7.5 Hz, 1H), 6.41 (d, *J* = 9.5 Hz, 1H), 2.46 (s, 3H); <sup>13</sup>C NMR (101 MHz, CDCl<sub>3</sub>) δ 161.1, 152.4, 143.9, 133.2, 126.3, 125.6, 124.0, 118.6, 116.3, 15.4.

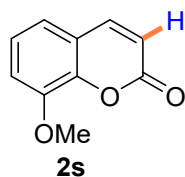

**8-methoxy-2H-chromen-2-one 2s**<sup>6</sup>: white solid, 93%, <sup>1</sup>H NMR (400 MHz, CDCl<sub>3</sub>) δ 7.70 (d, *J* = 9.6 Hz, 1H), 7.21 (t, *J* = 7.9 Hz, 1H), 7.07 (t, *J* = 8.9 Hz, 2H), 6.43 (d, *J* = 9.5 Hz, 1H), 3.96 (s, 3H); <sup>13</sup>C NMR (100 MHz, CDCl<sub>3</sub>) δ 160.2, 147.2, 143.71, 143.67, 124.3, 119.5, 119.3, 116.8, 113.8, 56.2.

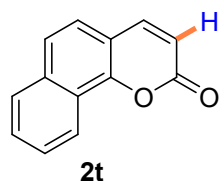

**2H-benzo[h]chromen-2-one 2t**<sup>5</sup>: white solid, 97%, <sup>1</sup>H NMR (400 MHz, CDCl<sub>3</sub>) δ 8.53 – 8.43 (m, 1H), 7.89 – 7.80 (m, 1H), 7.76 (d, *J* = 9.4 Hz, 1H), 7.61 (dd, *J* = 11.0, 6.5 Hz, 3H), 7.39 (d, *J* = 8.5 Hz, 1H), 6.47 (d, *J* = 9.4 Hz, 1H); <sup>13</sup>C NMR (100 MHz, CDCl<sub>3</sub>) δ 160.9, 151.3, 144.2, 134.8, 128.7, 127.8, 127.2, 124.4, 123.6, 123.0, 122.2, 115.9, 114.2.

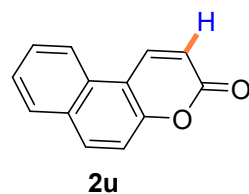

**2H-benzo[g]chromen-2-one 2u**<sup>6</sup>: white solid, 98%, <sup>1</sup>H NMR (400 MHz, CDCl<sub>3</sub>) δ 8.41 (d, *J* = 9.8 Hz, 1H), 8.16 (d, *J* = 8.4 Hz, 1H), 7.93 (d, *J* = 9.0 Hz, 1H), 7.87 (d, *J* = 8.1 Hz, 1H), 7.66 (t, *J* = 7.7 Hz, 1H), 7.55 (t, *J* = 7.5 Hz, 1H), 7.39 (d, *J* = 9.0 Hz, 1H), 6.53 (d, *J* = 9.8 Hz, 1H); <sup>13</sup>C NMR (100 MHz, CDCl<sub>3</sub>) δ 160.9, 153.8, 139.1, 133.1, 130.2, 128.99, 128.96, 128.3, 126.1, 121.3, 117.0, 115.6, 112.9.

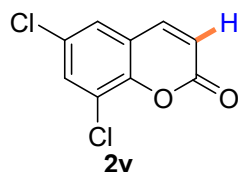

**6,8-dichloro-2H-chromen-2-one 2v**<sup>7</sup>: white solid, 88%, <sup>1</sup>H NMR (400 MHz, CDCl<sub>3</sub>) δ 7.64 (d, *J* = 9.6 Hz, 1H), 7.59 (s, 1H), 7.40 (s, 1H), 6.52 (d, *J* = 9.6 Hz, 1H); <sup>13</sup>C NMR (100 MHz, CDCl<sub>3</sub>) δ 158.8, 148.5, 142.0, 131.9, 129.6, 125.8, 122.8, 120.6, 118.6.

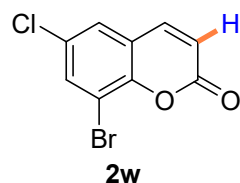

**6-bromo-8-chloro-2H-chromen-2-one 2w**: white solid, 99%, mp 169-170 °C, <sup>1</sup>H NMR (400 MHz, CDCl<sub>3</sub>) δ 7.74 (s, 1H), 7.64 (d, *J* = 9.6 Hz, 1H), 7.45 (s, 1H), 6.50 (d, *J* = 9.6 Hz, 1H); <sup>13</sup>C NMR (100 MHz, CDCl<sub>3</sub>) δ 159.0, 149.5, 142.1, 134.7, 129.9, 126.5, 120.6, 118.5, 111.2. HRMS (FTMS-ESI): [M + H]<sup>+</sup> calcd for C<sub>9</sub>H<sub>5</sub>BrClO<sub>2</sub><sup>+</sup>: 258.9156; found: 258.9153.

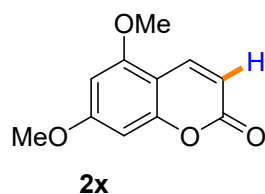

**5,7-dimethoxy-2H-chromen-2-one 2x**<sup>10</sup>: white solid, 80%, <sup>1</sup>H NMR (400 MHz, CDCl<sub>3</sub>) δ 7.94 (d, *J* = 9.6 Hz, 1H), 6.38 (s, 1H), 6.27 (s, 1H), 6.13 (d, *J* = 9.6 Hz, 1H), 3.88 (s, 3H), 3.84 (s, 3H); <sup>13</sup>C NMR (100 MHz, CDCl<sub>3</sub>) δ 163.7, 161.5, 157.0, 156.8, 138.7, 110.9, 104.0, 94.8, 92.8, 55.9, 55.8.

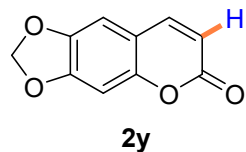

**6H-[1,3]dioxolo[4,5-g]chromen-6-one 2y**<sup>10</sup>: white solid, 99%, <sup>1</sup>H NMR (400 MHz, CDCl<sub>3</sub>) δ 7.60 (d, *J* = 9.5 Hz, 1H), 6.84 (d, *J* = 4.3 Hz, 2H), 6.29 (d, *J* = 9.5 Hz, 1H), 6.09 (s, 2H); <sup>13</sup>C NMR (100 MHz, CDCl<sub>3</sub>) δ 161.2, 151.29, 151.26, 144.9, 143.5, 113.4, 112.7, 105.0, 102.4, 98.4.

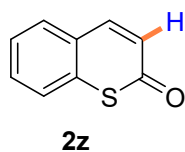

**2H-thiochromen-2-one 2z**<sup>11</sup>: brown solid, 80%, <sup>1</sup>H NMR (400 MHz, CDCl<sub>3</sub>) δ 7.63 (d, *J* = 10.6 Hz, 1H), 7.54 (d, *J* = 7.7 Hz, 1H), 7.47 – 7.35 (m, 2H), 7.31 (t, *J* = 7.3 Hz, 1H), 6.47 (d, *J* = 10.6 Hz, 1H);



$^{13}\text{C}$  NMR (100 MHz,  $\text{CDCl}_3$ )  $\delta$  185.4, 143.8, 137.6, 131.6, 129.9, 126.5, 126.1, 125.9, 124.2.

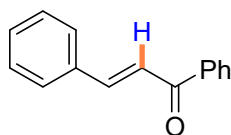

**4a**

**(E)-chalcone 4a**<sup>12</sup>: pale yellow, 63%,  $^1\text{H}$  NMR (400 MHz,  $\text{CDCl}_3$ )  $\delta$  8.06 (d,  $J = 7.7$  Hz, 2H), 7.85 (d,  $J = 15.7$  Hz, 1H), 7.67 (d,  $J = 4.6$  Hz, 2H), 7.65 – 7.60 (m, 1H), 7.55 (dd,  $J = 16.5, 10.9$  Hz, 3H), 7.44 (s, 3H);  $^{13}\text{C}$  NMR (100 MHz,  $\text{CDCl}_3$ )  $\delta$  190.6, 144.9, 138.3, 134.9, 132.8, 130.6, 129.0, 128.7, 128.53, 128.48, 122.1

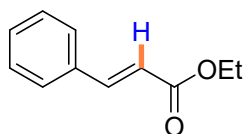

**4b**

**ethyl cinnamate 4b**<sup>12</sup>: colorless liquid, 70%,  $^1\text{H}$  NMR (400 MHz,  $\text{CDCl}_3$ )  $\delta$  7.72 (d,  $J = 16.0$  Hz, 1H), 7.54 (d,  $J = 4.7$  Hz, 2H), 7.48 – 7.35 (m, 3H), 6.47 (d,  $J = 16.0$  Hz, 1H), 4.29 (q,  $J = 7.1$  Hz, 2H), 1.36 (t,  $J = 7.1$  Hz, 3H);  $^{13}\text{C}$  NMR (100 MHz,  $\text{CDCl}_3$ )  $\delta$  167.0, 144.6, 134.5, 130.2, 128.9, 128.1, 118.3, 60.5, 14.3.

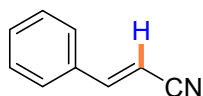

**4c**

**cinnamionitrile 4c**<sup>13</sup>: colorless liquid, 76%,  $^1\text{H}$  NMR (400 MHz,  $\text{CDCl}_3$ )  $\delta$  7.49 – 7.38 (m, 6H), 5.90 (d,  $J = 16.7$  Hz, 1H);  $^{13}\text{C}$  NMR (100 MHz,  $\text{CDCl}_3$ )  $\delta$  150.6, 133.6, 131.3, 129.2, 127.4, 118.2, 96.4.

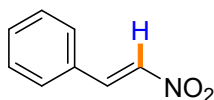

**4d**

**(2-nitrovinyl)benzene 4d**<sup>15</sup>: yellow solid, 83%,  $^1\text{H}$  NMR (400 MHz,  $\text{CDCl}_3$ )  $\delta$  8.01 (d,  $J = 13.7$  Hz, 1H), 7.59 (d,  $J = 13.8$  Hz, 1H), 7.55 (d,  $J = 7.5$  Hz, 2H), 7.52 – 7.41 (m, 3H).  $^{13}\text{C}$  NMR (100 MHz,  $\text{CDCl}_3$ )  $\delta$  139.1, 137.1, 132.2, 130.1, 129.4, 129.2.

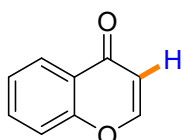

**4e**

**4H-chromen-4-one 4e**<sup>14</sup>: yellow solid, 90%,  $^1\text{H}$  NMR (400 MHz,  $\text{CDCl}_3$ )  $\delta$  8.23 (d,  $J = 8.0$  Hz, 1H), 7.87 (d,  $J = 6.0$  Hz, 1H), 7.69 (t,  $J = 7.8$  Hz, 1H), 7.47 (d,  $J = 8.5$  Hz, 1H), 7.42 (t,  $J = 7.6$  Hz, 1H), 6.36 (d,  $J = 6.0$  Hz, 1H);  $^{13}\text{C}$  NMR (100 MHz,  $\text{CDCl}_3$ )  $\delta$  177.6, 156.6, 155.3, 133.8, 125.8, 125.3, 124.9, 118.2, 113.0.

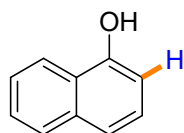

**4f**

**naphthalen-1-ol 4f**<sup>16</sup>: off-white solid, 80%, <sup>1</sup>H NMR (400 MHz, CDCl<sub>3</sub>) δ 8.43 – 8.21 (m, 1H), 7.99 – 7.87 (m, 1H), 7.59 (dt, *J* = 13.1, 7.0 Hz, 3H), 7.39 (t, *J* = 7.9 Hz, 1H), 6.85 (d, *J* = 7.5 Hz, 1H), 5.67 (s, 1H); <sup>13</sup>C NMR (100 MHz, CDCl<sub>3</sub>) δ 151.3, 134.9, 127.8, 126.6, 126.0, 125.5, 124.5, 121.6, 121.0, 109.0.

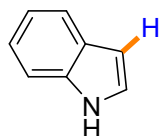

**4g**

**1H-indole 4g**<sup>17</sup>: pink solid, 30%, <sup>1</sup>H NMR (400 MHz, CDCl<sub>3</sub>) δ 8.05 (s, 1H), 7.76 (d, *J* = 7.8 Hz, 1H), 7.43 (d, *J* = 8.1 Hz, 1H), 7.30 (t, *J* = 7.5 Hz, 1H), 7.23 (dd, *J* = 8.2, 5.4 Hz, 2H), 6.65 (s, 1H); <sup>13</sup>C NMR (100 MHz, CDCl<sub>3</sub>) δ 135.8, 127.9, 124.2, 122.1, 120.8, 119.9, 111.1, 102.6.

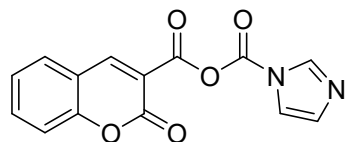

**6a**

**1H-imidazole-1-carboxylic 2-oxo-2H-chromene-3-carboxylic 6a**, mp 89-90 °C (decomposed), <sup>1</sup>H NMR (400 MHz, DMSO) δ 8.53 (s, 1H), 8.02 (s, 1H), 7.83 (d, *J* = 7.6 Hz, 1H), 7.68 (t, *J* = 7.8 Hz, 1H), 7.37 (dd, *J* = 11.9, 8.0 Hz, 2H), 7.19 (s, 2H); <sup>13</sup>C NMR (100 MHz, DMSO) δ 165.2, 157.8, 154.6, 146.6, 135.2, 134.1, 130.2, 125.2, 121.5, 121.4, 118.7, 116.5. MS (ITMS-ESI): [M + Na]<sup>+</sup> calcd for C<sub>14</sub>H<sub>8</sub>N<sub>2</sub>NaO<sub>5</sub><sup>+</sup>: 307.0; found: 307.0.

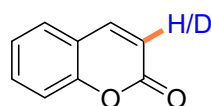

**2a'**

**2a'**, <sup>1</sup>H NMR (400 MHz, CDCl<sub>3</sub>) δ 7.65 (d, *J* = 4.9 Hz, 2H), 7.51 – 7.38 (m, 4H), 7.27 (d, *J* = 8.3 Hz, 2H), 7.22 (d, *J* = 7.5 Hz, 2H), 6.36 (d, *J* = 9.5 Hz, 0.47H).

## 4. Reference

- (a) Chen, W.; Zhou, Z. H.; Chen, H. B., Efficient synthesis of chiral benzofuryl beta-amino alcohols via a catalytic asymmetric Henry reaction. *Org. Biomol. Chem.* **2017**, *15*, 1530–1536. (b) Lu, Z.; Fan, W.; Lu, Y.; Fan, C.; Zhao, H.; Guo, K.; Chu, W.; Lu, Y., A highly sensitive fluorescent probe for bioimaging zinc ion in living cells and zebrafish models. *New J. Chem.* **2018**, *42*, 12198–12204.
- (a) Wei, L.; Wang, J.; Zhang, X.; Wang, P.; Zhao, Y.; Li, J.; Hou, T.; Qu, L.; Shi, L.; Liang, X.; Fang, Y., Discovery of 2H-Chromen-2-one Derivatives as G Protein-Coupled Receptor-35 Agonists. *J. Med. Chem.* **2017**, *60*, 362–372. (b) Fu, X. B.; Wang, X. F.; Chen, J. N.; Wu, D. W.; Li, T.; Shen, X. C.; Qin, J. K., Synthesis, Fluorescence Properties, and Antiproliferative Potential of Several 3-Oxo-3H-benzo[f]chromene-2-carboxylic Acid Derivatives. *Molecules.* **2015**, *20*, 18565–18584.
- (a) Li, N.; Xu, M.; Wang, B.; Shi, Z.; Zhao, Z.; Tang, Y.; Wang, X.; Sun, J.; Chen, L., Discovery of Novel Celastrol Derivatives as Hsp90-Cdc37 Interaction Disruptors with Antitumor Activity. *J. Med. Chem.* **2019**, *62*, 10798–10815. (b) Flipo, M.; Beghyn, T.; Leroux, V.; Florent, I.; Deprez, B. P.; Deprez-Poulain, R. F., Novel selective inhibitors of the zinc plasmodial aminopeptidase PfA-M1 as potential antimalarial agents. *J. Med. Chem.* **2007**, *50*, 1322–1334. (c) Bartoli, G.; Beleggia, R.; Giuli, S., The CeCl<sub>3</sub> centre dot 7H<sub>2</sub>O-NaI system as promoter in the synthesis of functionalized trisubstituted alkenes via Knoevenagel condensation. *Tetrahedron Lett.* **2006**, *47*, 6051–6054. (d) Peraman, R.; Meka, G.; Chilamakuru, N. B.; Kutagulla, V. K.; Malla, S.; Ashby, C. R.; Tiwari, A. K.; Yiragamreddy, P. R., Novel stilbene scaffolds efficiently target Mycobacterium tuberculosis nucleoid-associated protein. *New J. Chem.* **2021**, *45*, 10683–10692. (e) Garden, S. J.; Guimarães, C.; Corrêa, M.; Oliveira, C.; Pinto, A.; Ricardo, B., Synthetic and theoretical studies on the reduction of electron withdrawing group conjugated olefins using the Hantzsch 1,4-dihydropyridine ester. *J. Org. Chem.* **2003**, *68*, 8815–8822. (f) Vivier, D.; Soussia, I. B.; Rodrigues, N.; Lollignier, S.; Devilliers, M. L.; Chatelain, F. C.; Prival, L.; Chapuy, E.; Bourdier, G.; Bennis, K., Development of the first two-pore domain potassium channel TWIK-related K<sup>+</sup> channel 1-selective agonist possessing in Vivo antinociceptive activity. *J. Med. Chem.* **2017**, *60*, 1076–1088.
- Li, M.; Petersen, J. L.; Hoover, J. M., Silver-Mediated Oxidative Decarboxylative Trifluoromethylthiolation of Coumarin-3-carboxylic Acids. *Org. Lett.* **2017**, *19*, 638–641.
- Sharma, U.; Naveen, T.; Maji, A.; Manna, S.; Maiti, D., Palladium-catalyzed synthesis of benzofurans and coumarins from phenols and olefins. *Angew. Chem. Int. Ed.* **2013**, *52*, 12669–12673.
- Cervi, A.; Vo, Y.; Chai, C. L. L.; Banwell, M. G.; Lan, P.; Willis, A. C., Gold(I)-Catalyzed Intramolecular Hydroarylation of Phenol-Derived Propiolates and Certain Related Ethers as a Route to Selectively Functionalized Coumarins and 2H-Chromenes. *J. Org. Chem.* **2021**, *86*, 178–198.
- Reddy, M. S.; Thirupathi, N.; Haribabu, M., Tandem aldehyde-alkyne-amine coupling/cycloisomerization: A new synthesis of coumarins. *Beilstein. J. Org. Chem.* **2013**, *9*, 180–184.
- Chen, Z.; Bai, X.; Sun, J.; Xu, Y., Fe(III)-Catalyzed Decarboxylative C3-Difluoroarylmethylation of Coumarins with alpha,alpha-Difluoroarylacetic Acids. *J. Org. Chem.* **2020**, *85*, 7674–7682.
- Wu, J.-S.; Liu, W.-M.; Zhuang, X.-Q.; Wang, F.; Wang, P.-F.; Tao, S.-L.; Zhang, X.-H.; Wu, S.-K.; Lee, S.-T., Fluorescence Turn On of Coumarin Derivatives by Metal Cations: A New Signaling Mechanism Based on C=N Isomerization. *Org. Lett.* **2007**, *9*, 33–36.
- Gadakh, S. K.; Dey, S.; Sudalai, A., Rh-Catalyzed Synthesis of Coumarin Derivatives from

- Phenolic Acetates and Acrylates via C-H Bond Activation. *J. Org. Chem.* **2015**, *80*, 11544–115450.
11. Ferraroni, M.; Carta, F.; Scozzafava, A.; Supuran, C. T., Thioxocoumarins Show an Alternative Carbonic Anhydrase Inhibition Mechanism Compared to Coumarins. *J. Med. Chem.* **2016**, *59*, 462–473.
12. Niknam, E.; Moaddeli, A.; Khalafi-Nezhad, A., Palladium anchored on guanidine-terminated magnetic dendrimer (G3-Gu-Pd): An efficient nano-sized catalyst for phosphorous-free Mizoroki-Heck and copper-free Sonogashira couplings in water. *J. Organomet. Chem.* **2020**, *923*, 121369.
13. Kanagaraj, K.; Pitchumani, K., The aminocyclodextrin/Pd(OAc)<sub>2</sub> complex as an efficient catalyst for the Mizoroki-Heck cross-coupling reaction. *Chem. Eur. J.* **2013**, *19*, 14425–14431.
14. Zhang, X.-W.; Jiang, G.-Q.; Lei, S.-H.; Shan, X.-H.; Qu, J.-P.; Kang, Y.-B., Iron-Catalyzed  $\alpha,\beta$ -Dehydrogenation of Carbonyl Compounds. *Org. Lett.* **2021**, *23*, 1611–1615.
15. Zhang, M.; Hu, P.; Zhou, J.; Wu, G.; Huang, S.; Su, W. PdCatalyzed Multidehydrogenative Cross-Coupling between (Hetero)-Arenes and Nitroethane to Construct  $\beta$ -Aryl Nitroethylenes. *Org. Lett.* **2013**, *15*, 1718–1721.
16. Yang, K.; Li, Z.; Wang, Z.; Yao, Z.; Jiang, S., Highly Efficient Synthesis of Phenols by Copper-Catalyzed Hydroxylation of Aryl Iodides, Bromides, and Chlorides. *Org. Lett.* **2011**, *13*, 4340–4343.
17. Tilstam, U., A Continuous Protodecarboxylation of Heteroaromatic Carboxylic Acids in Sulfolane. *Org. Process Res. Dev.* **2012**, *16*, 1449–1454.

## 5 The NMR of 1d, 1i, 1o, 2, 4, 6a, 2a'

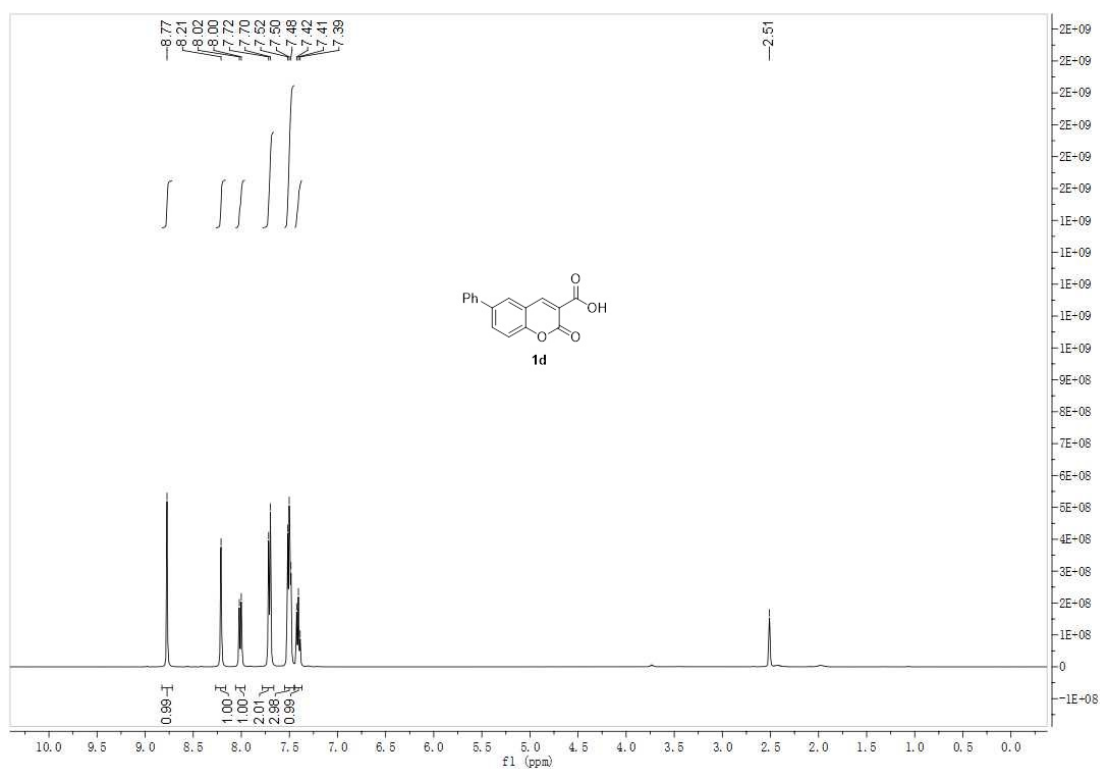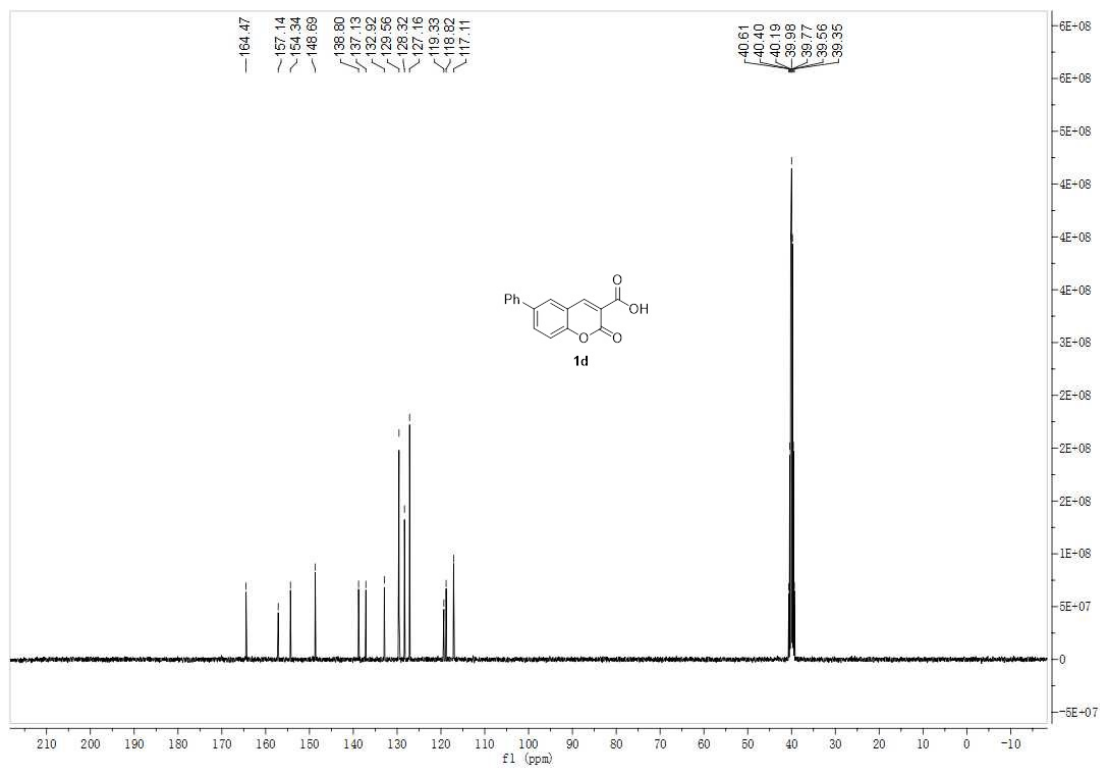

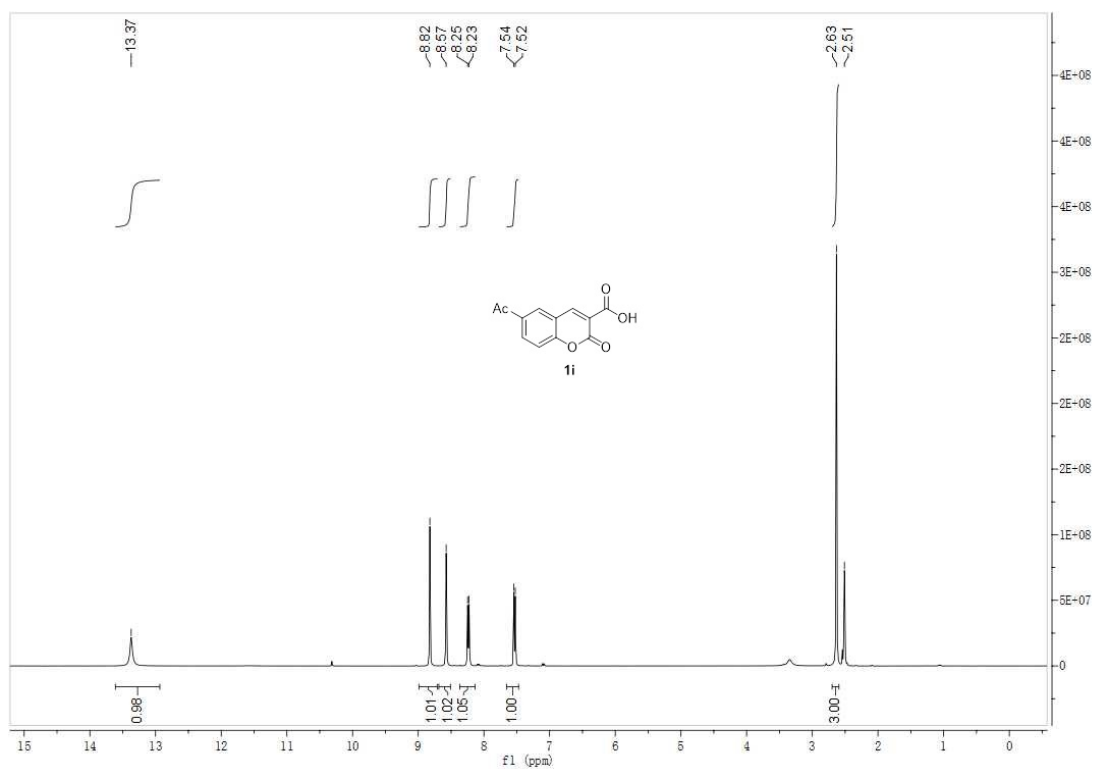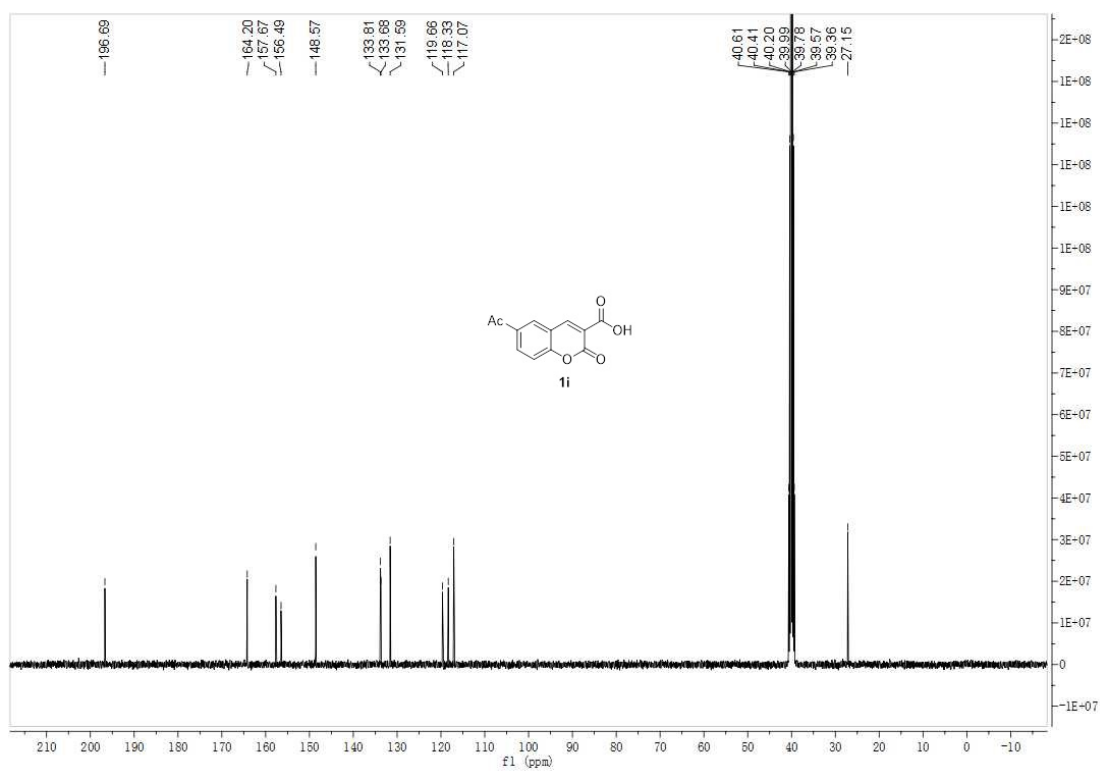

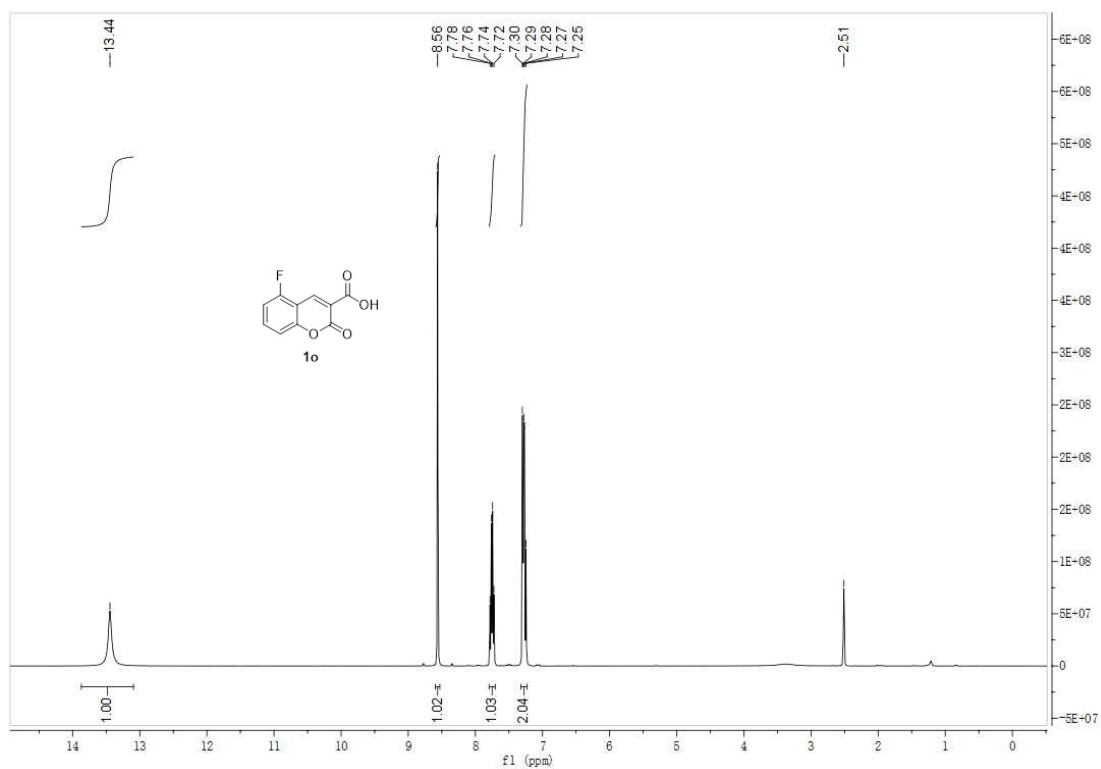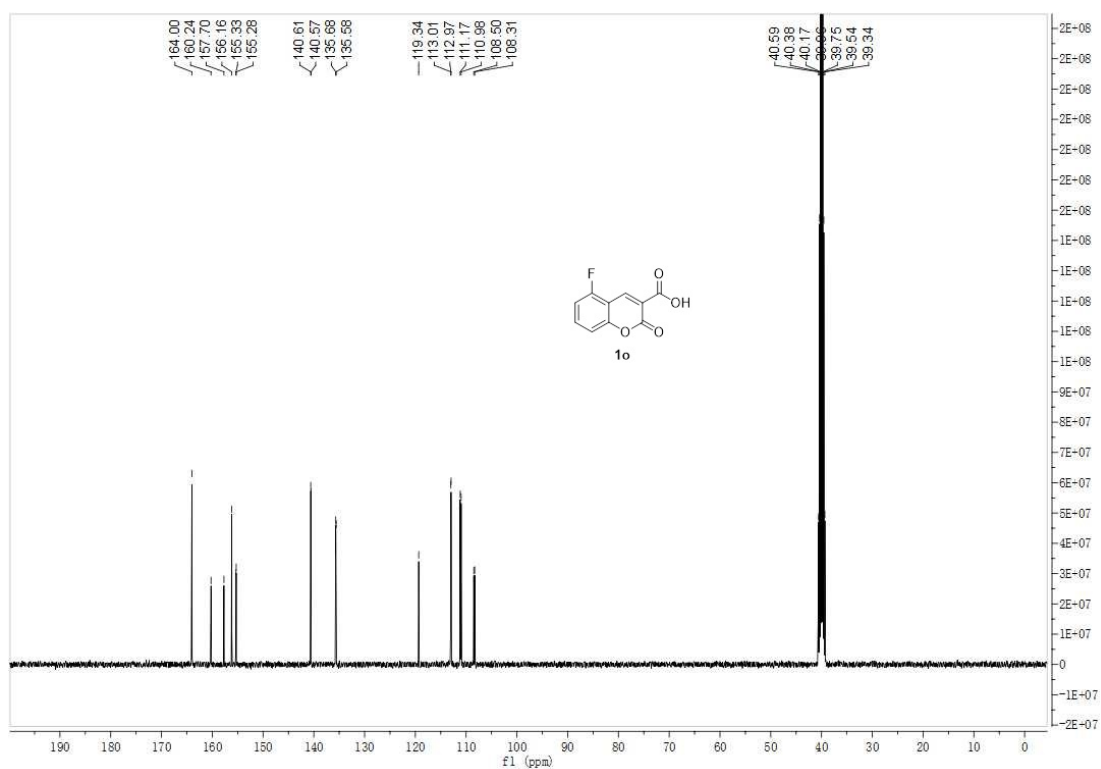

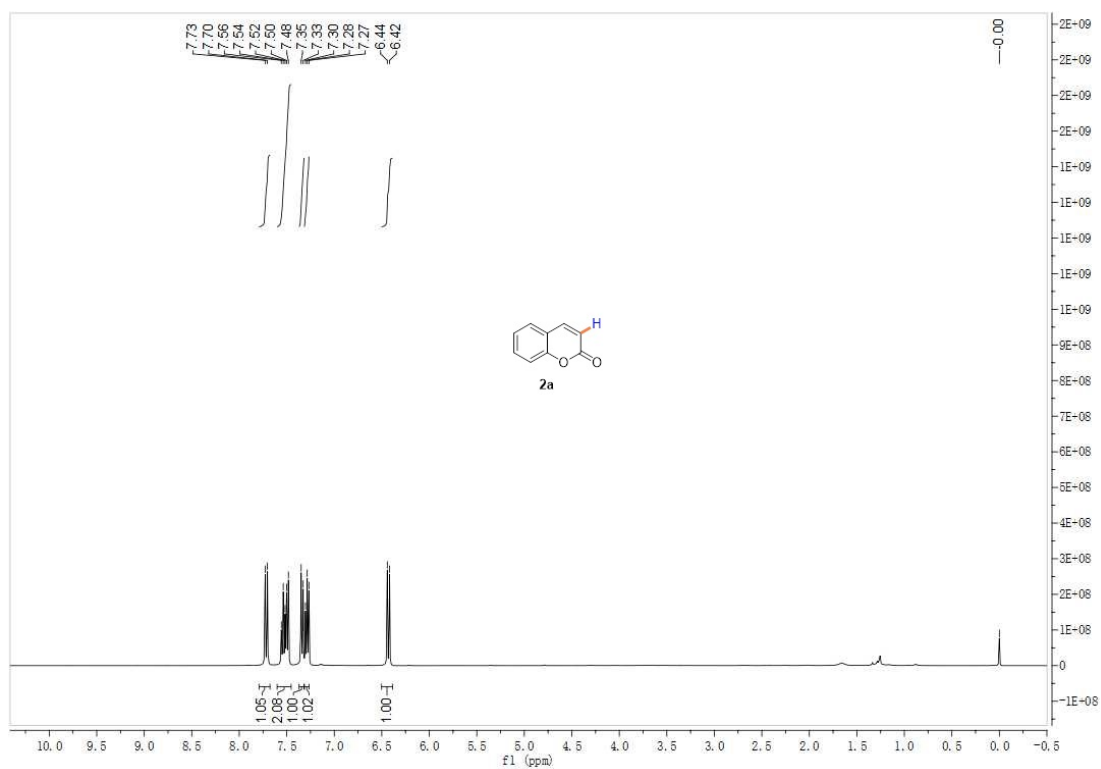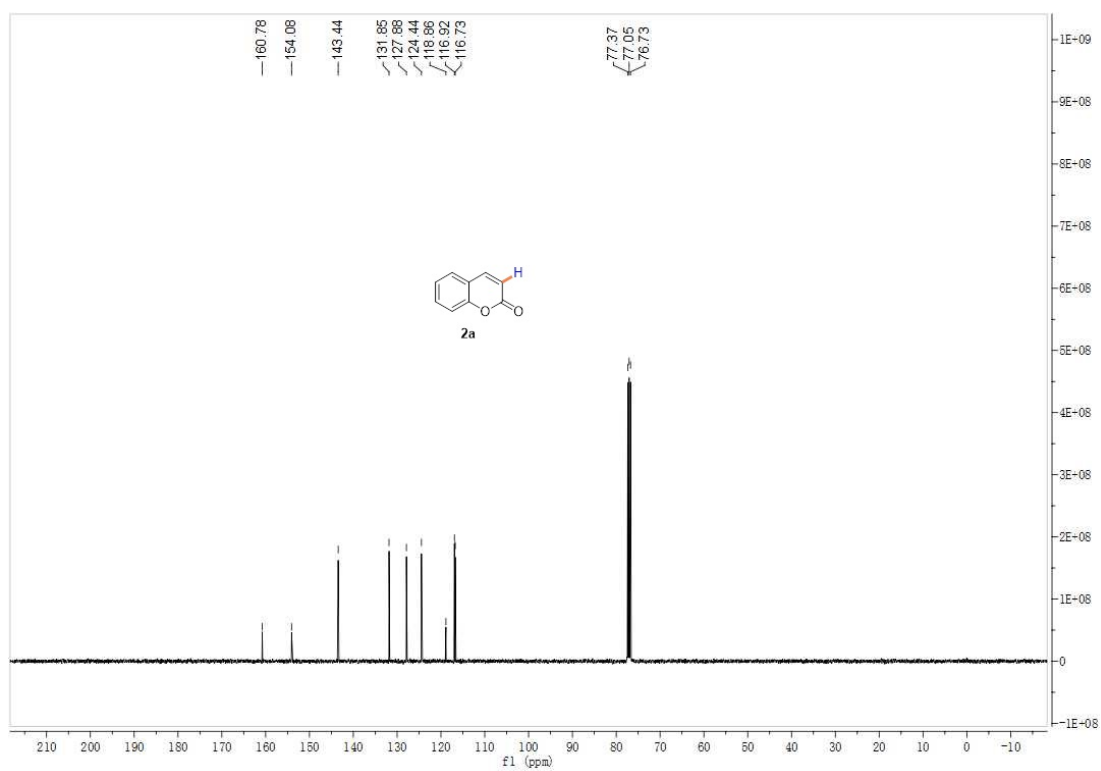



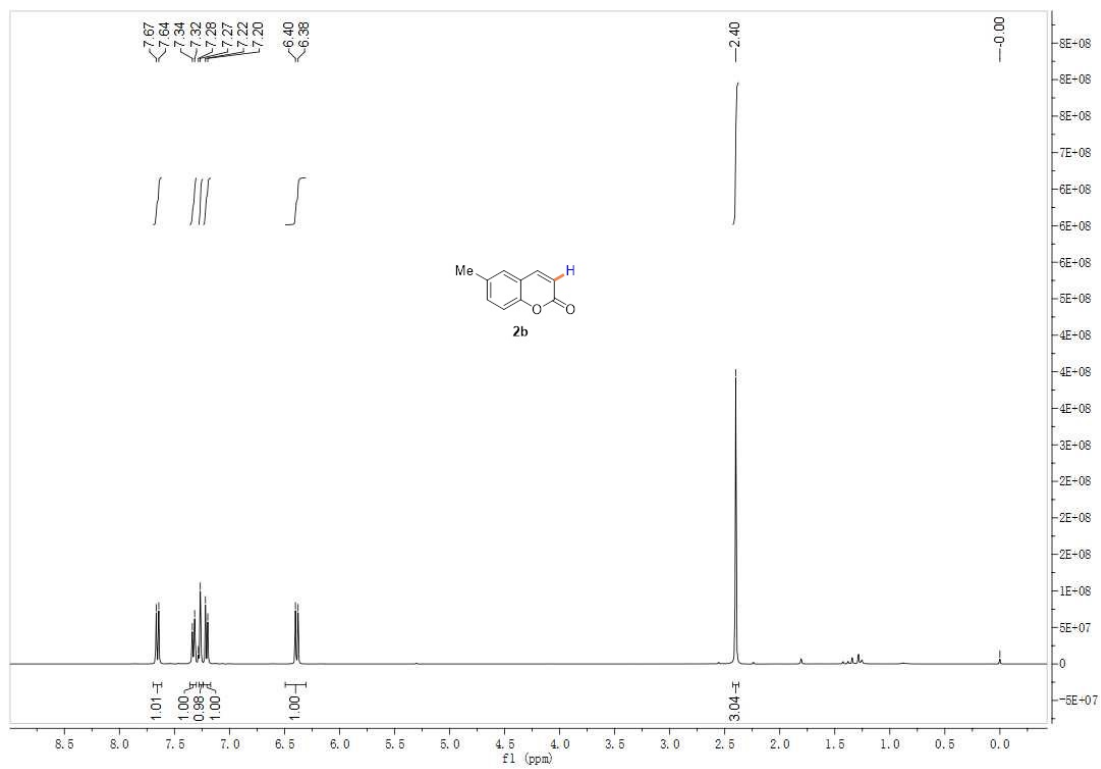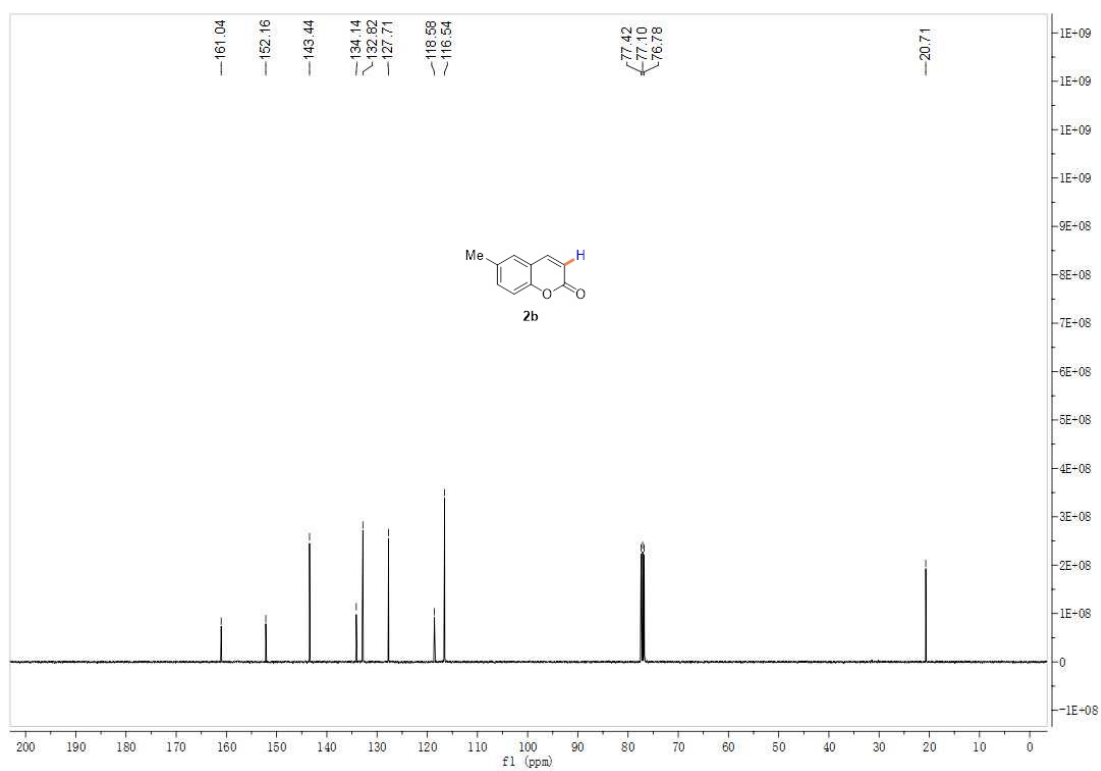

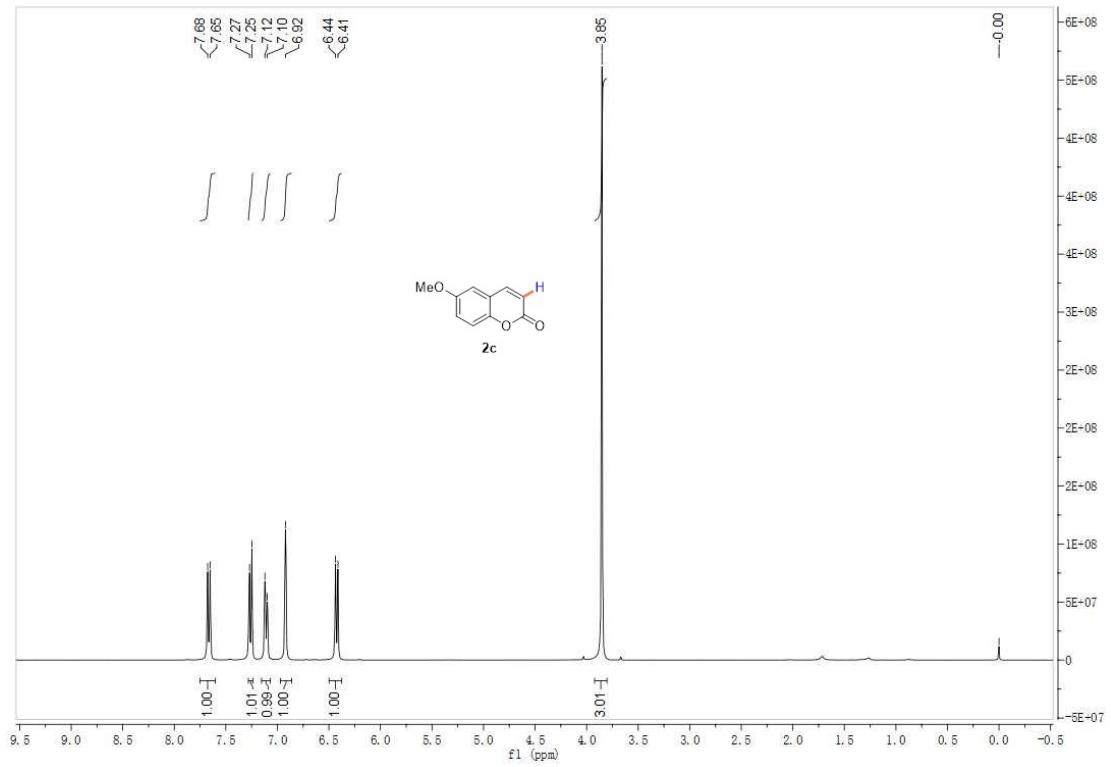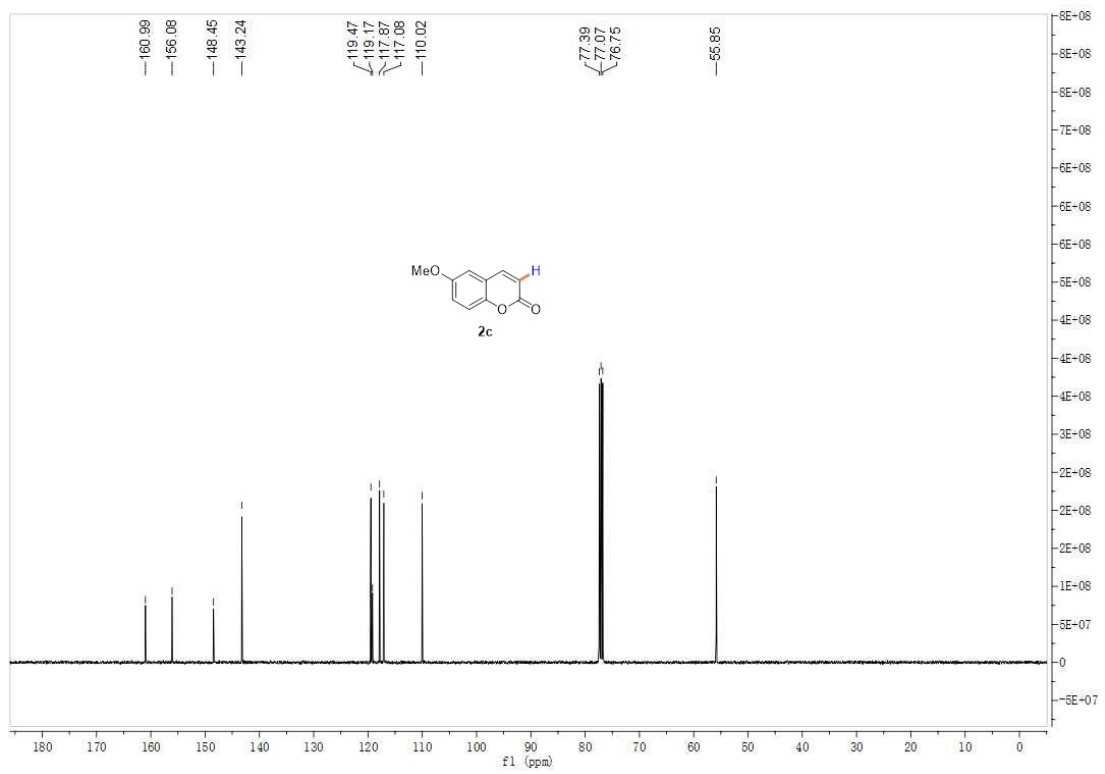

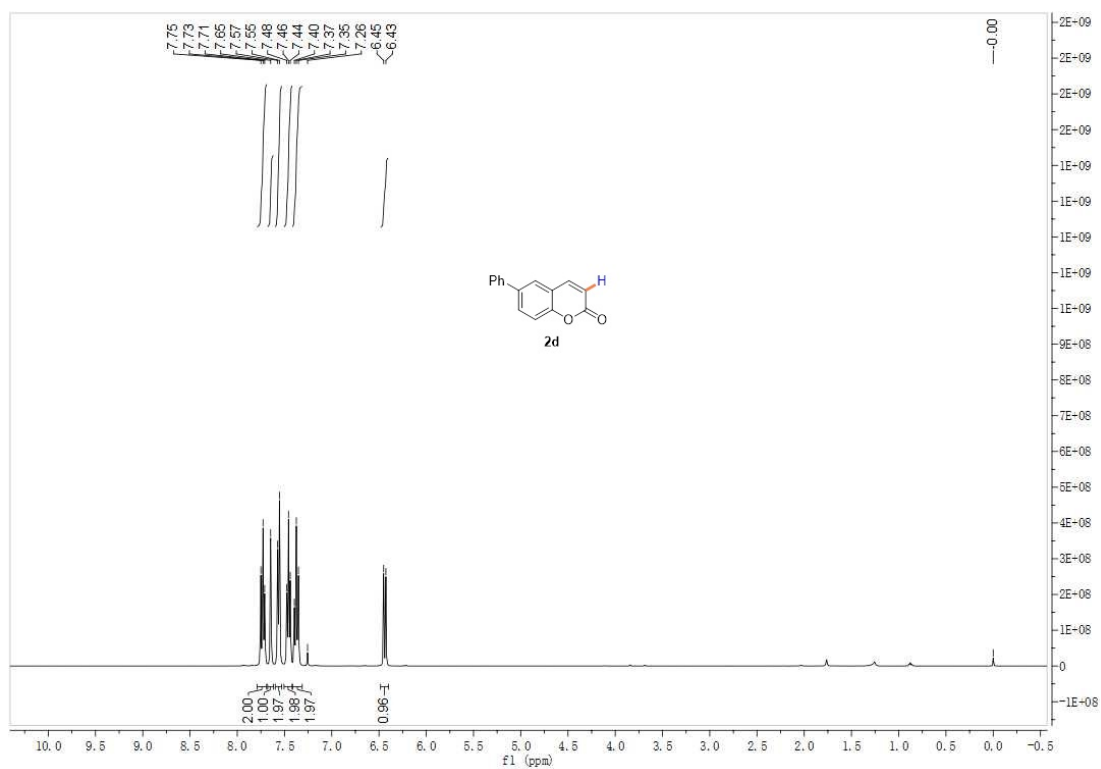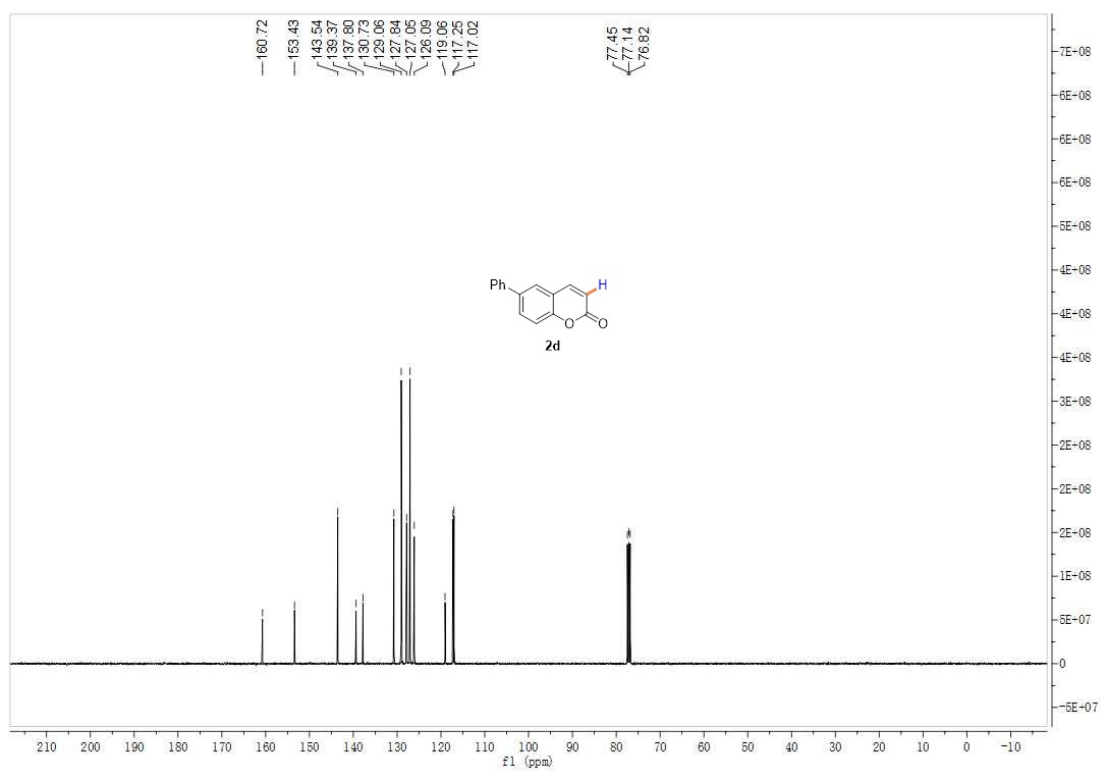

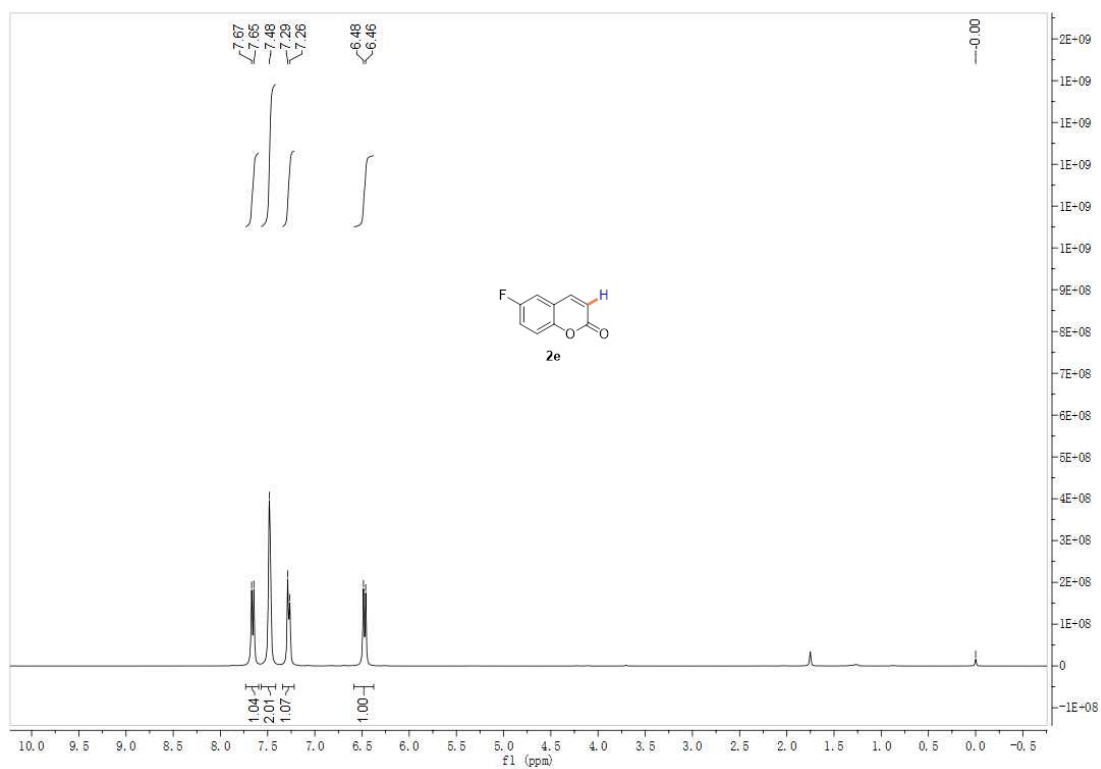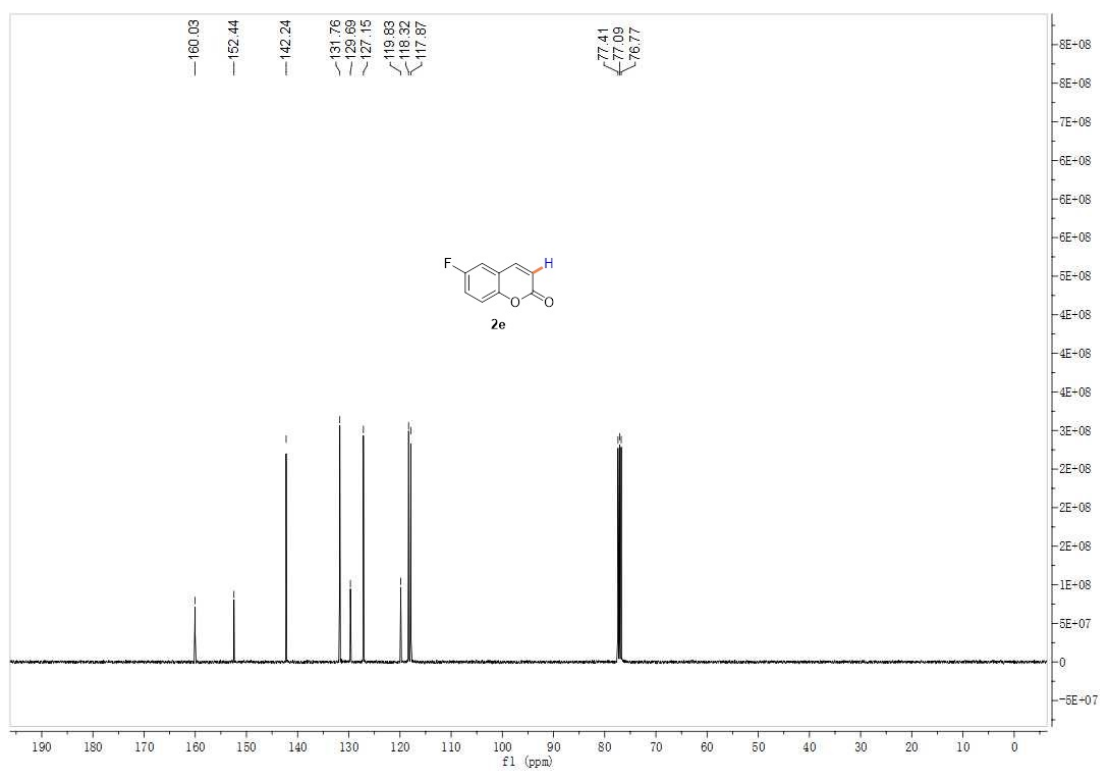

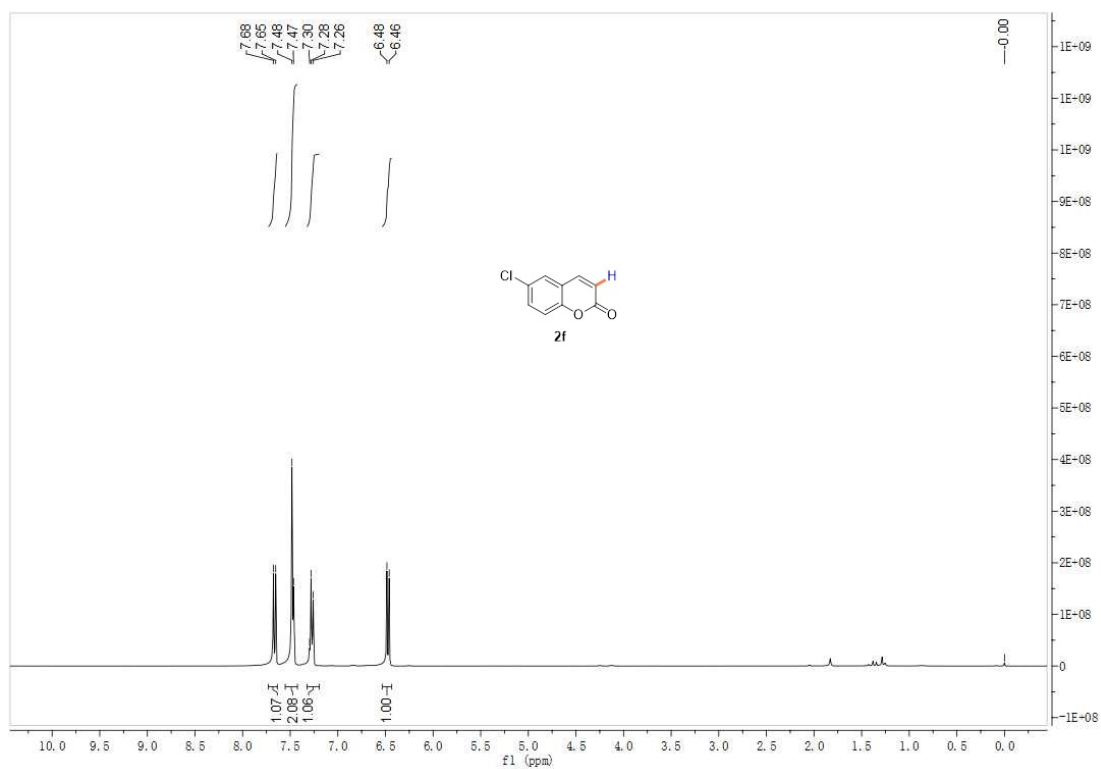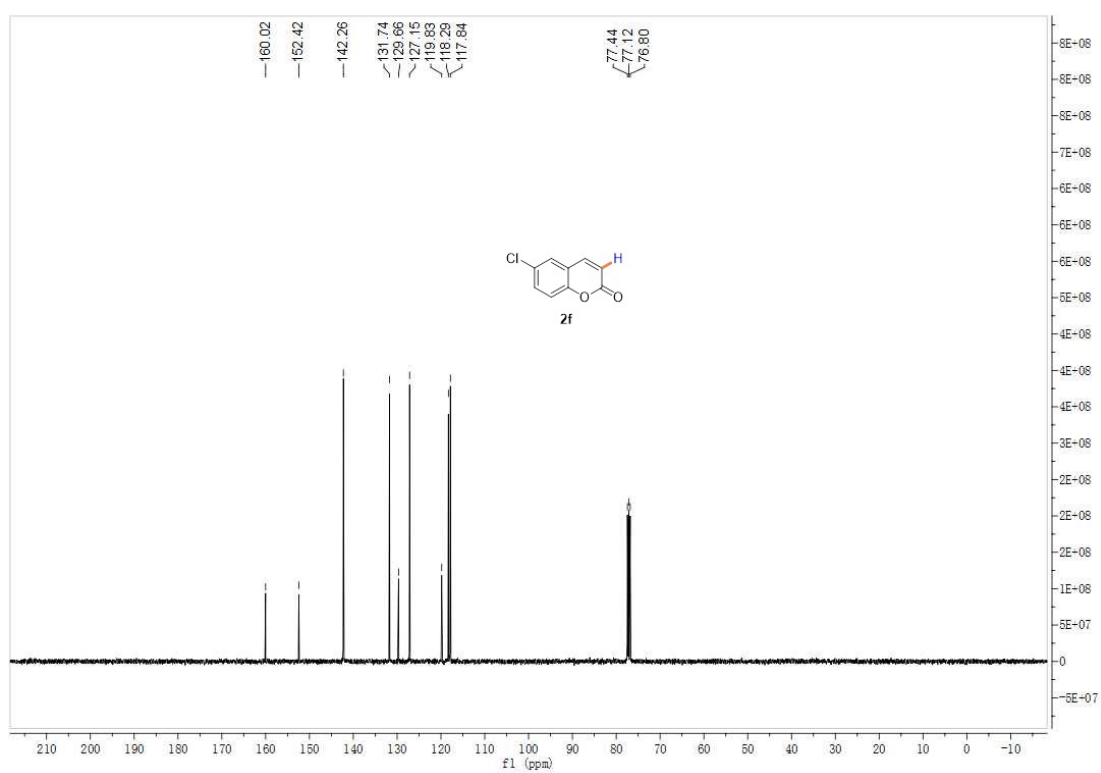

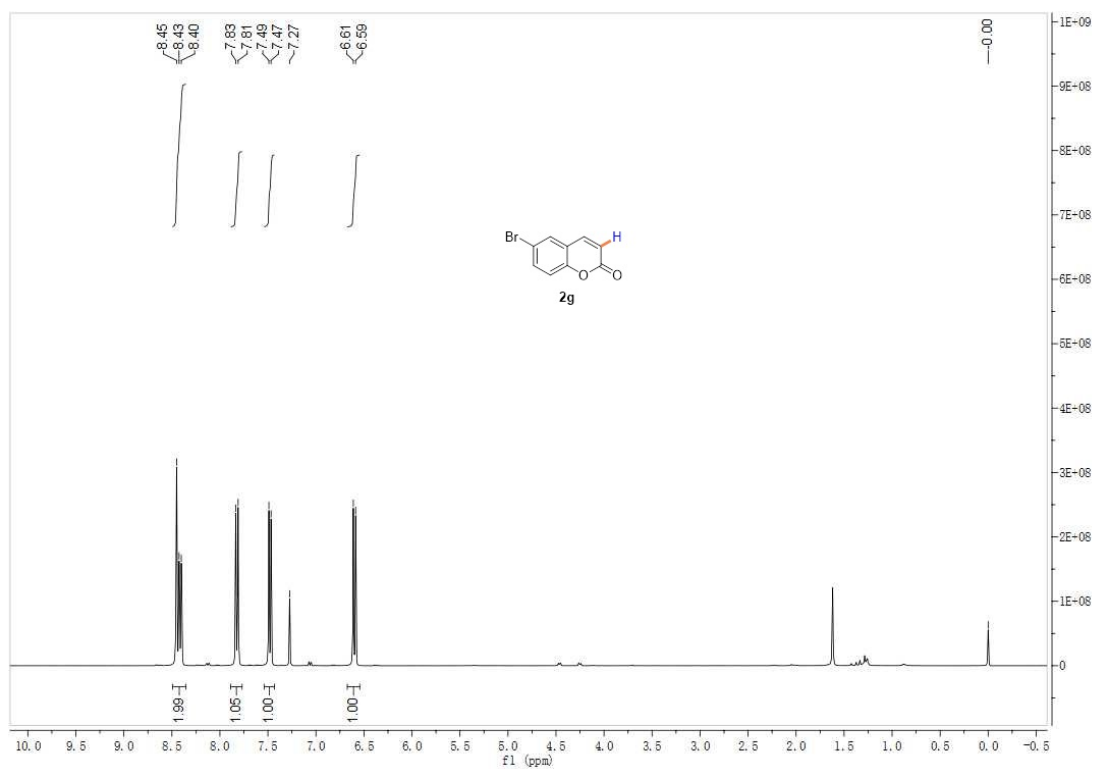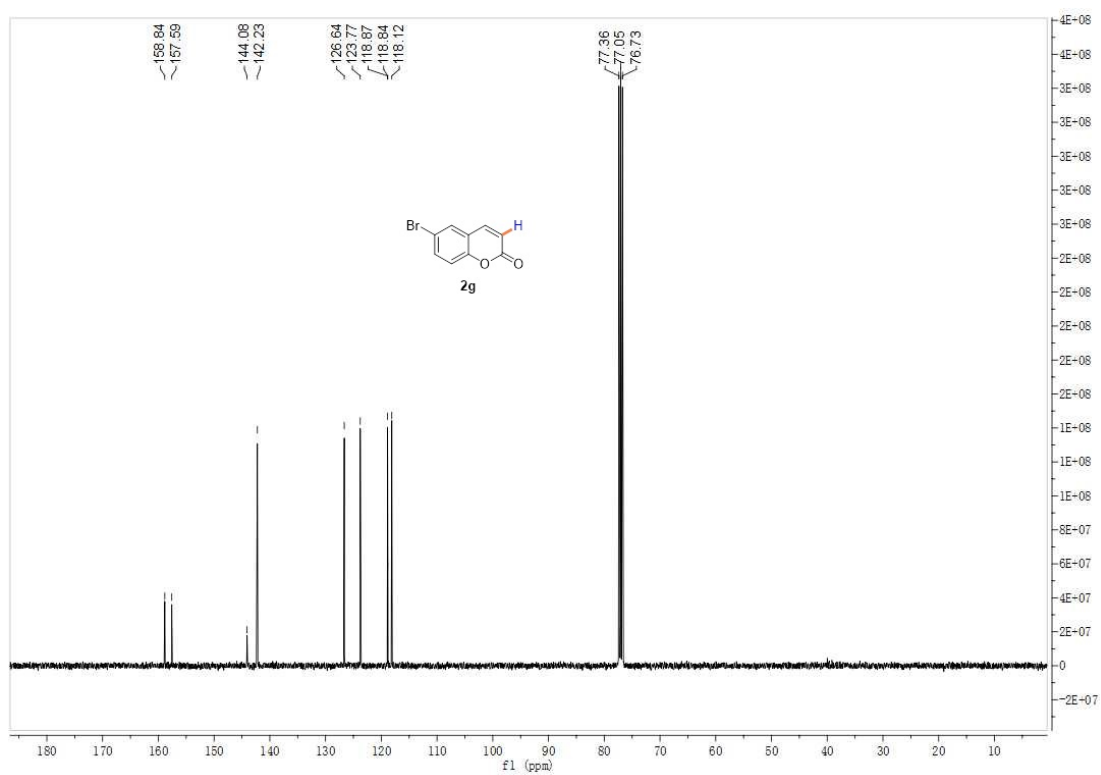

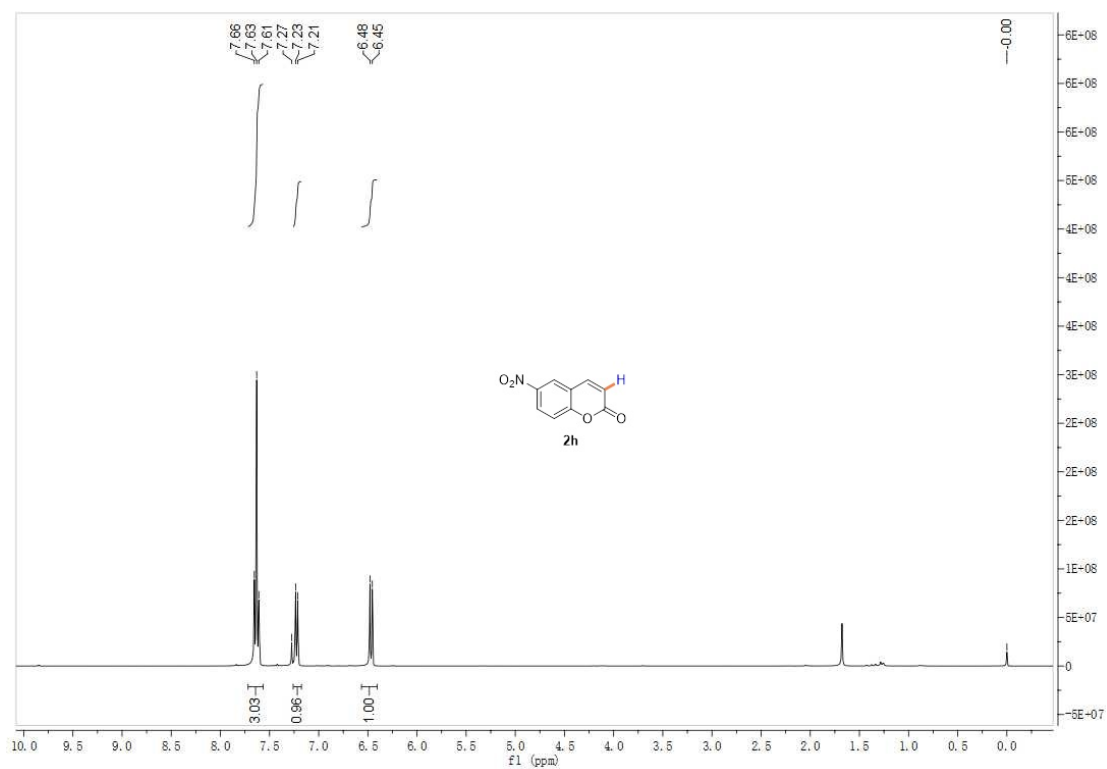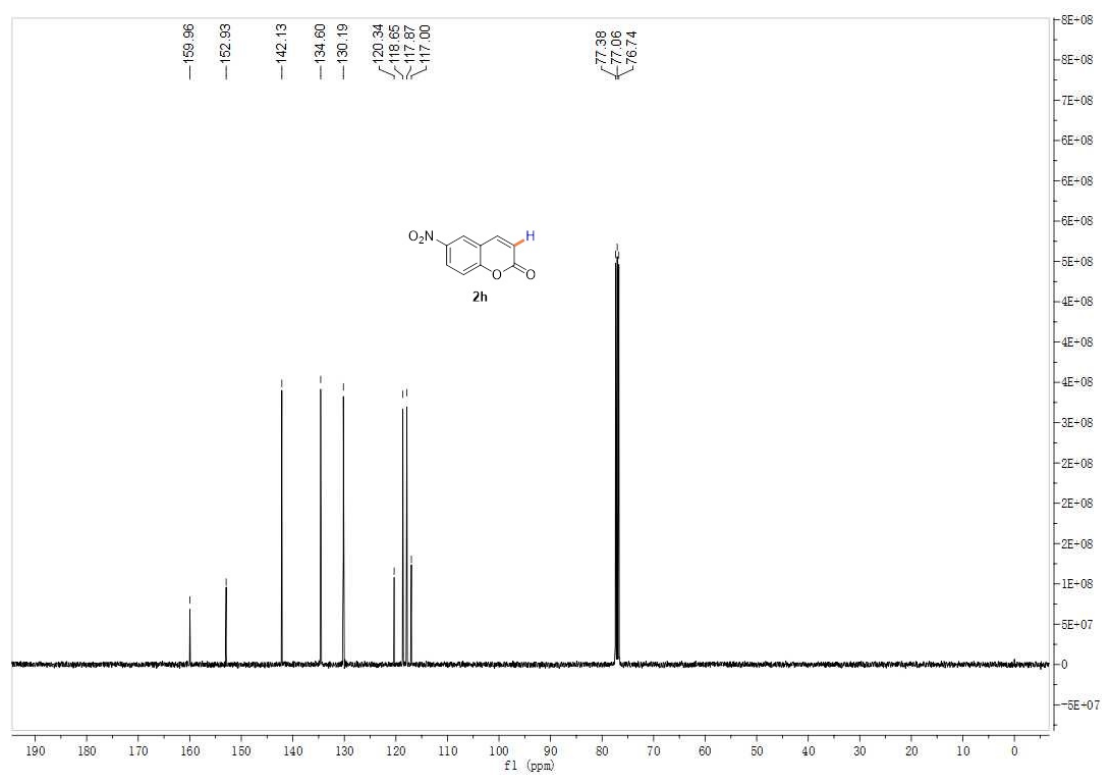

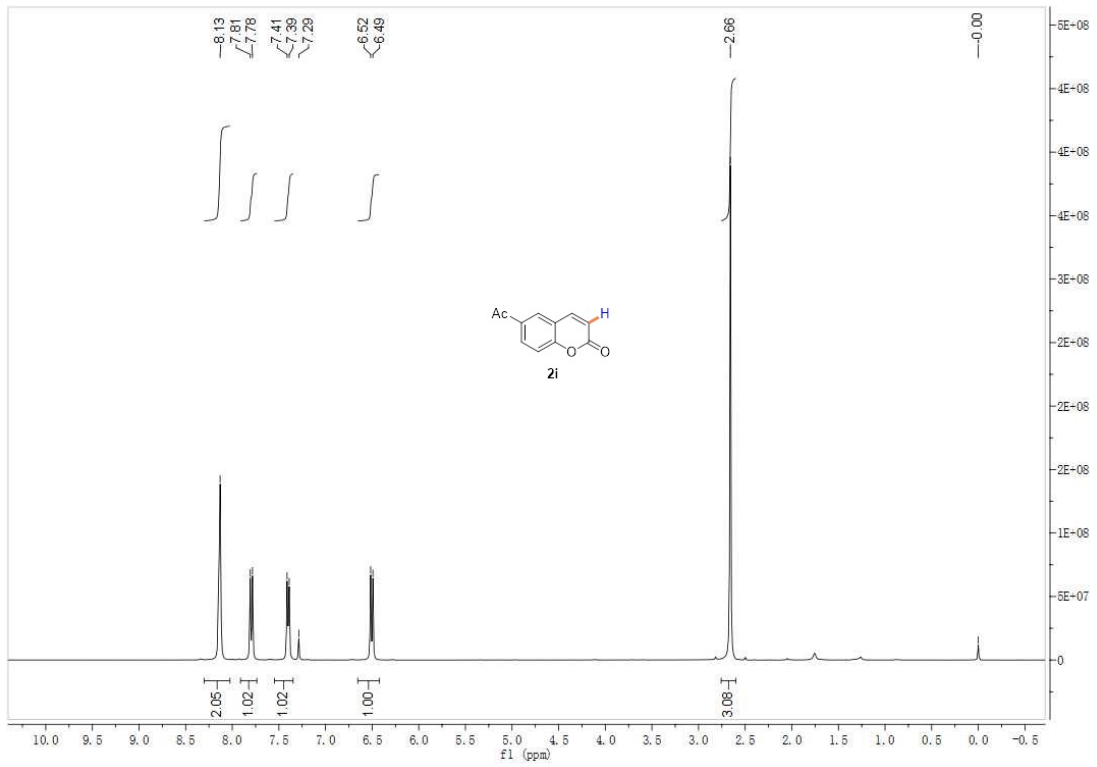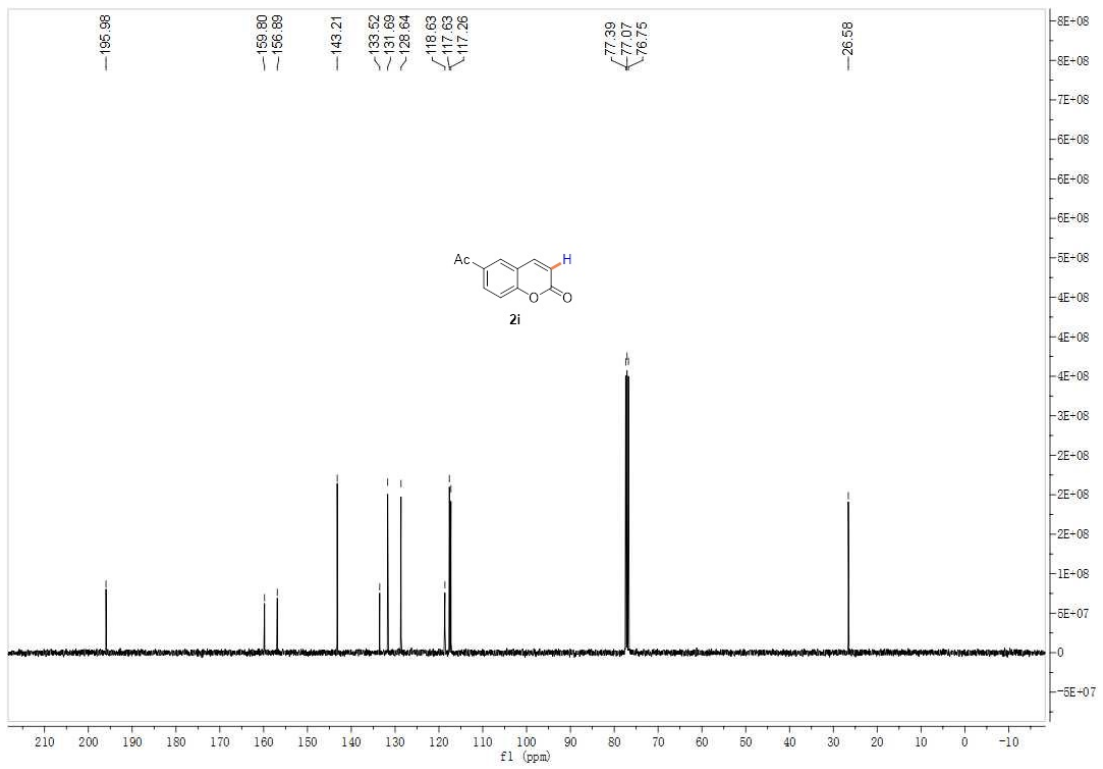



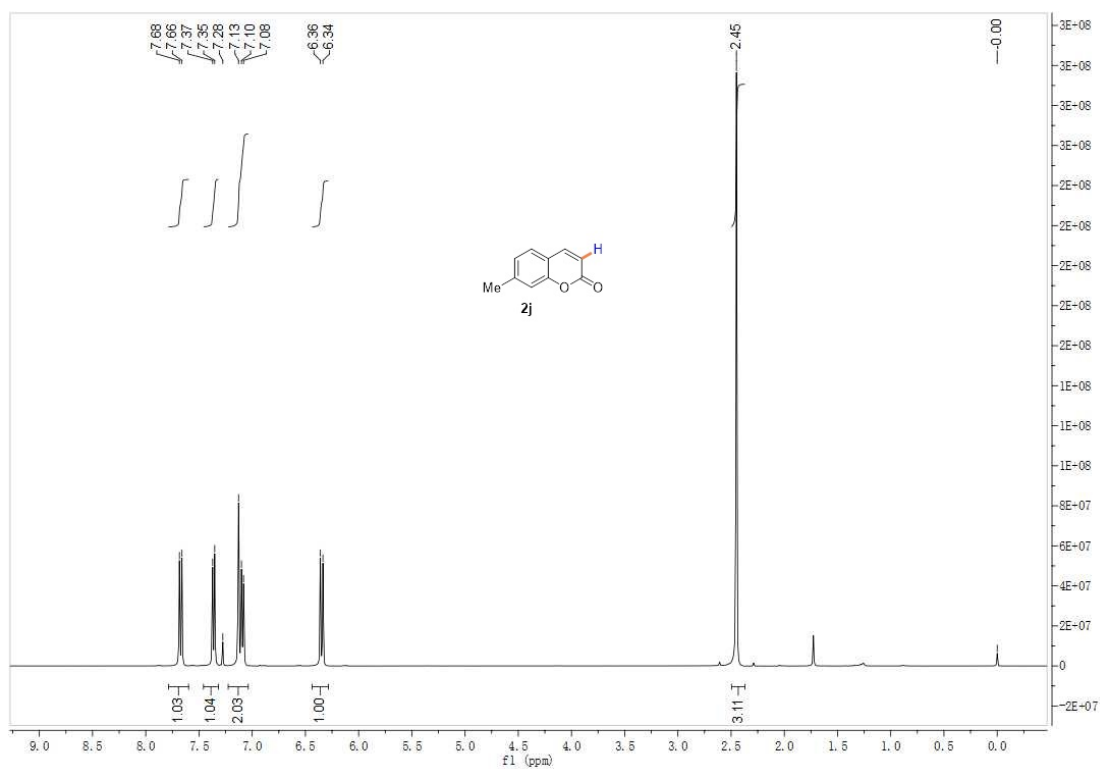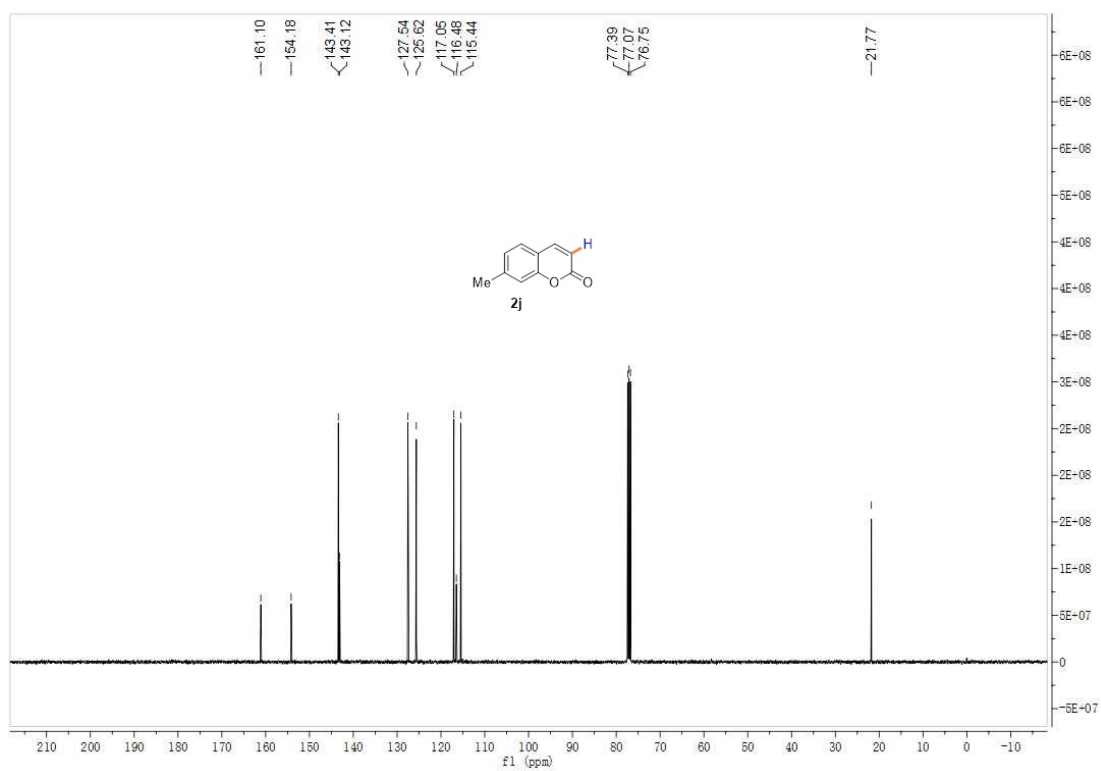

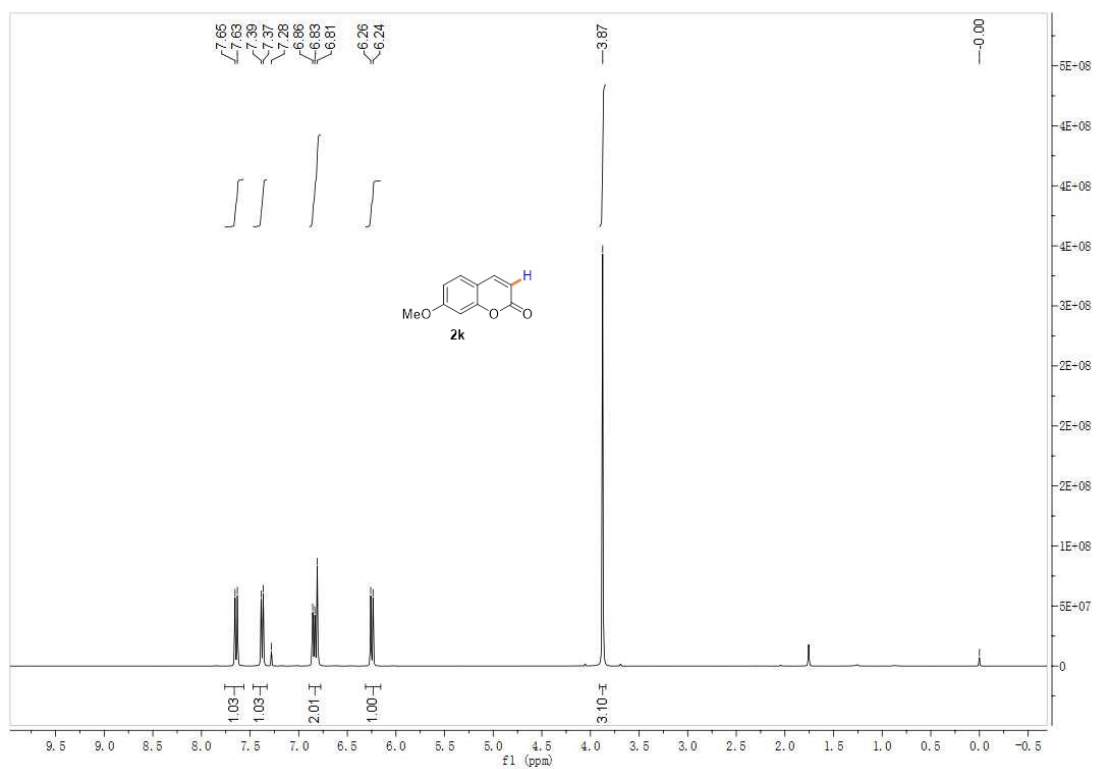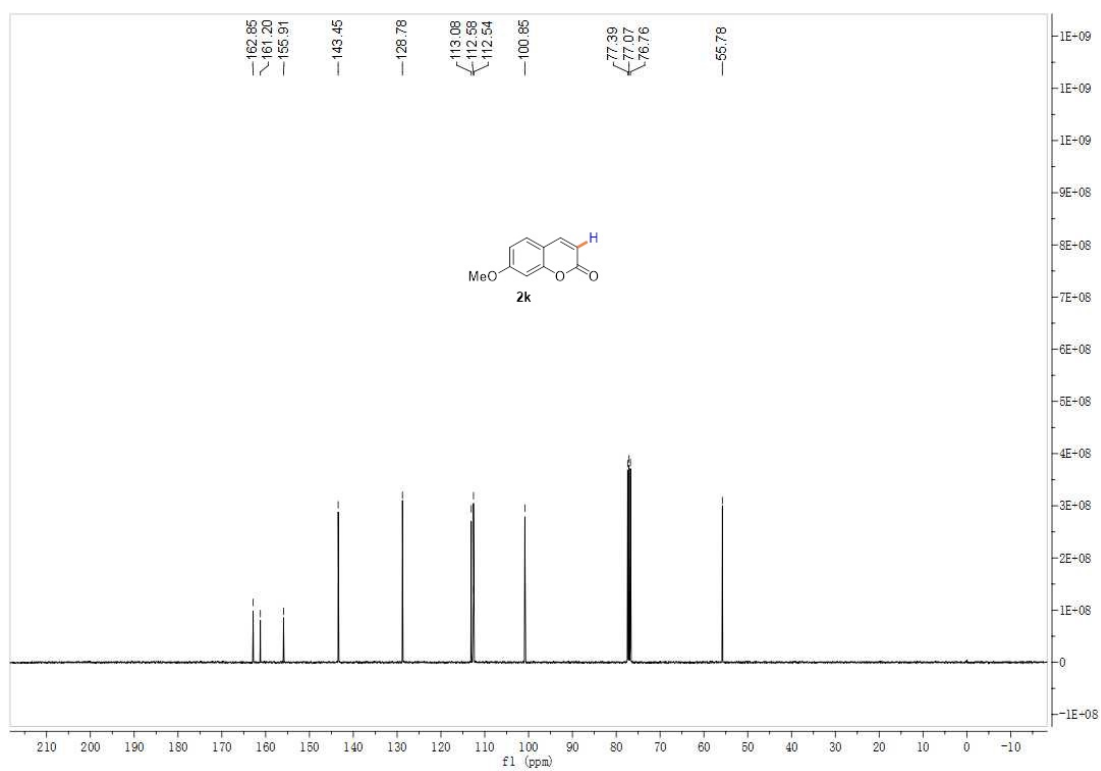

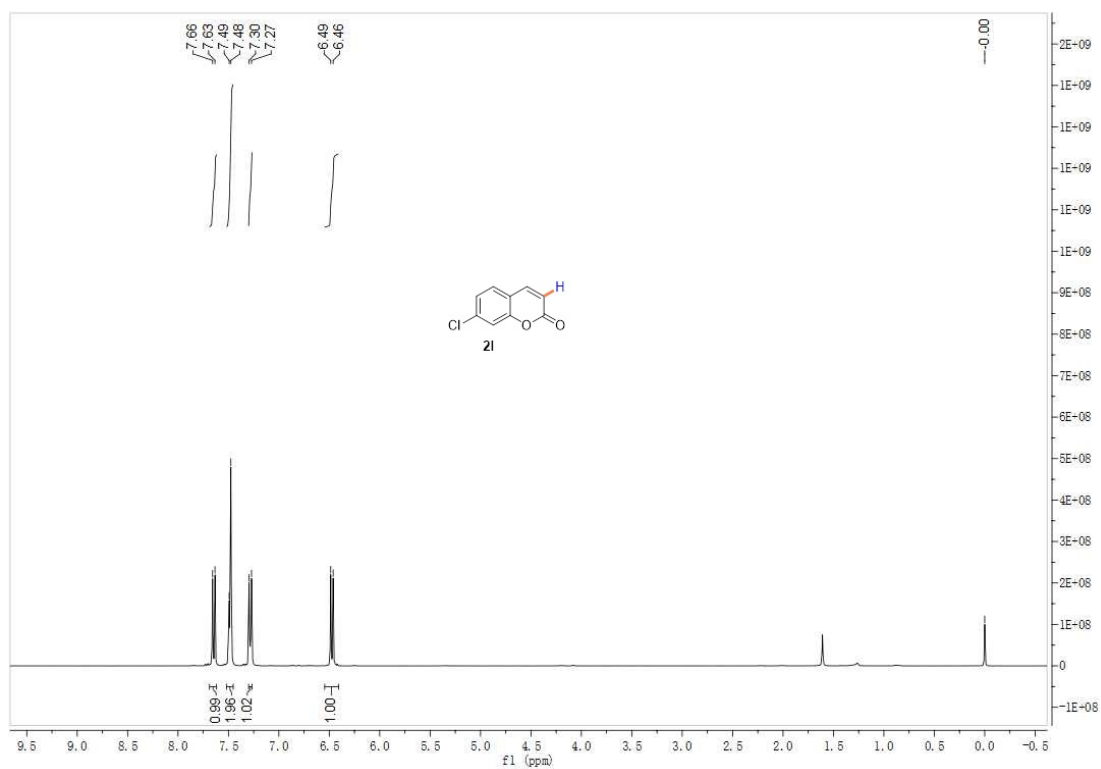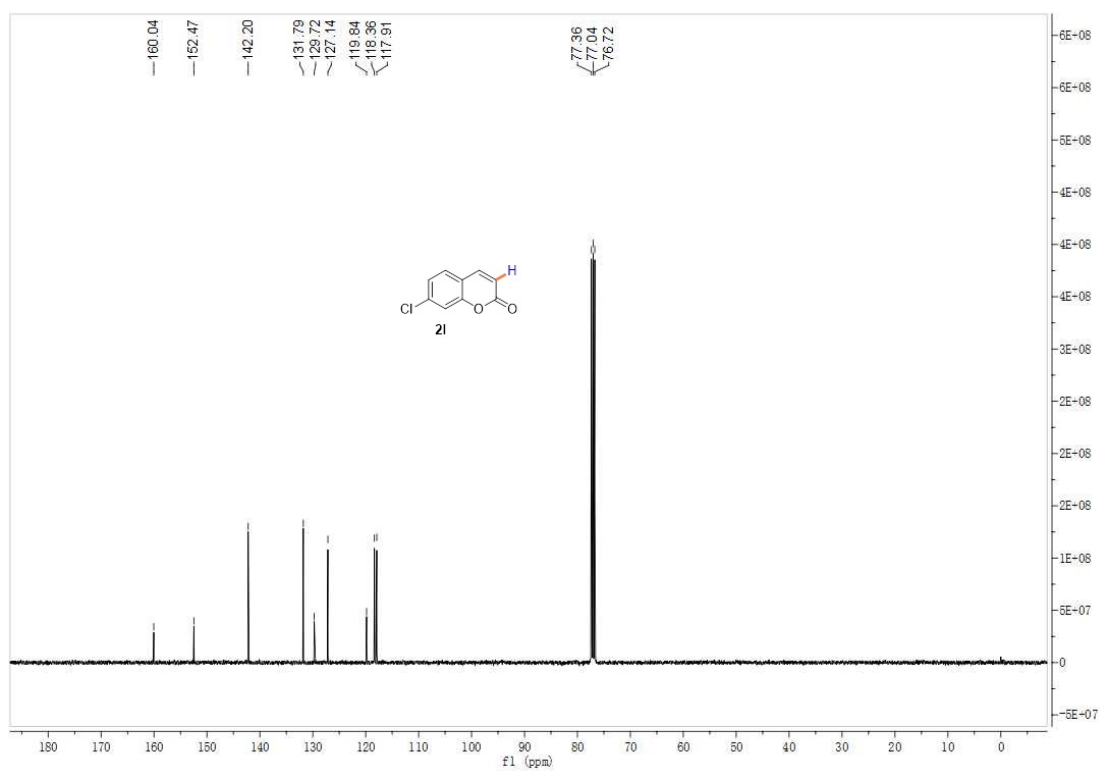

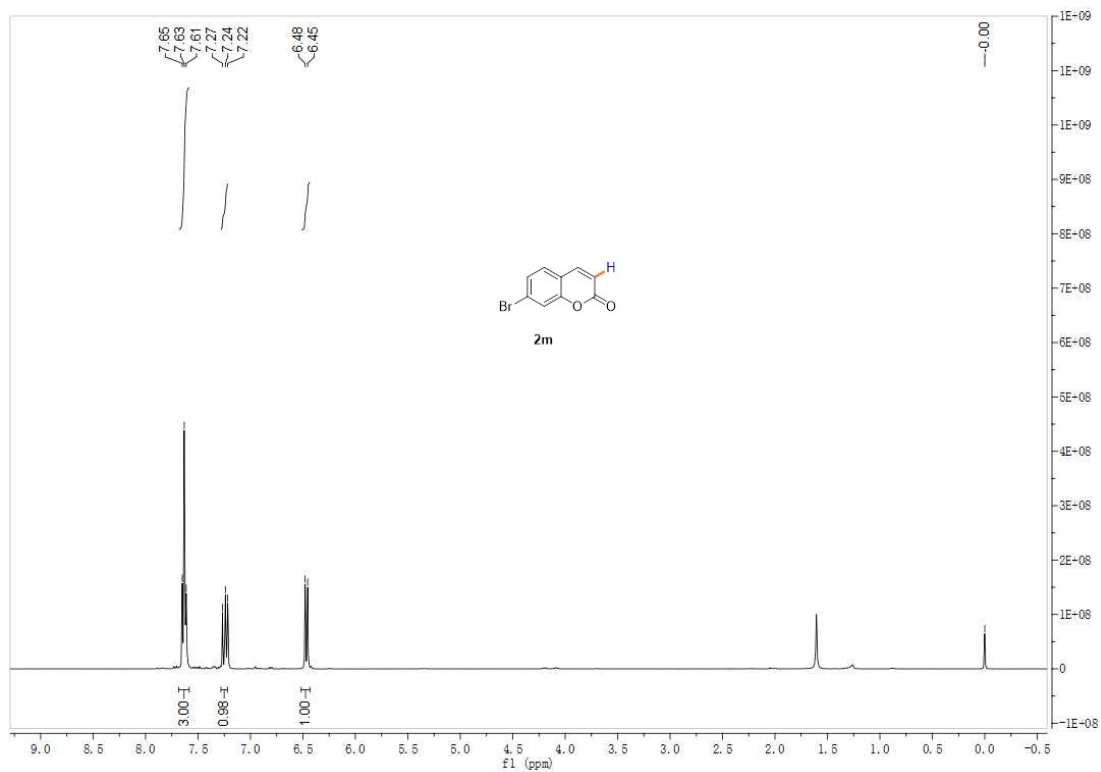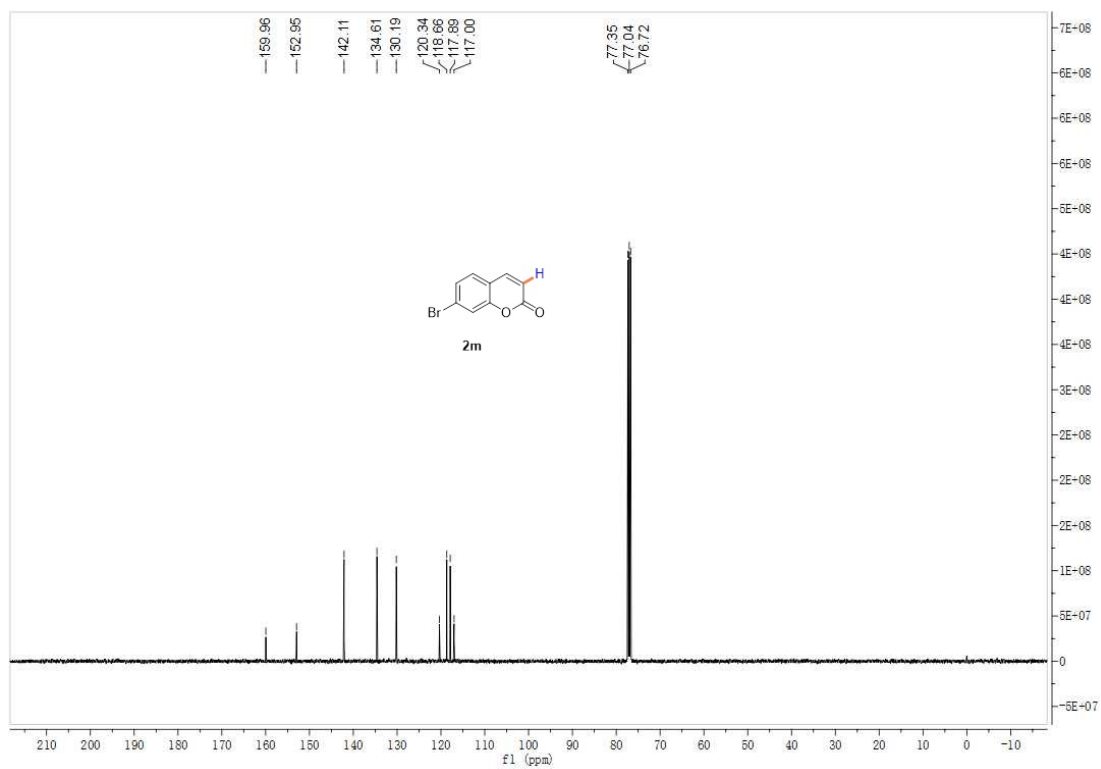

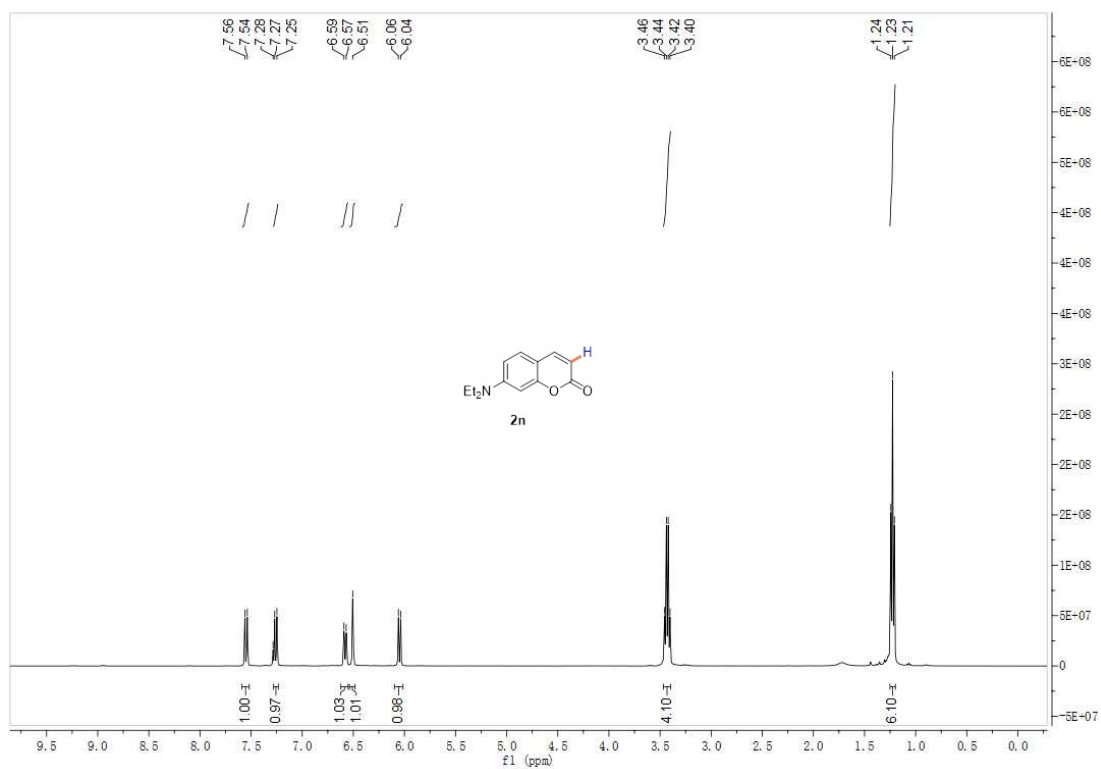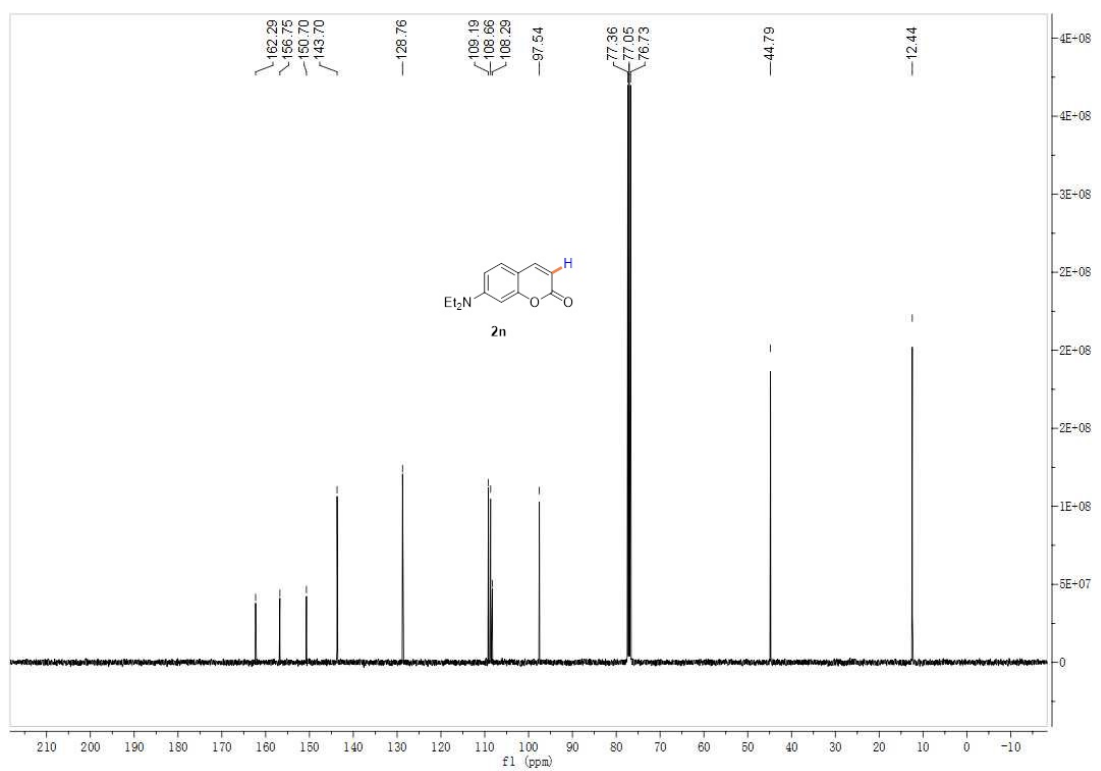

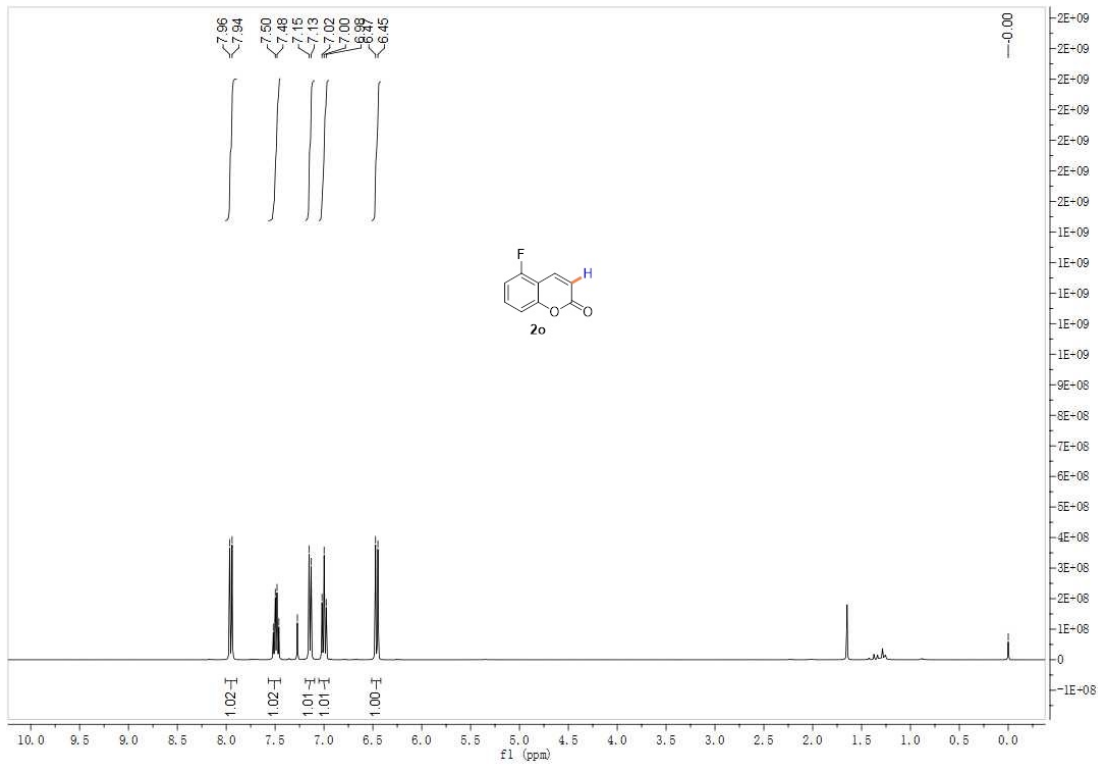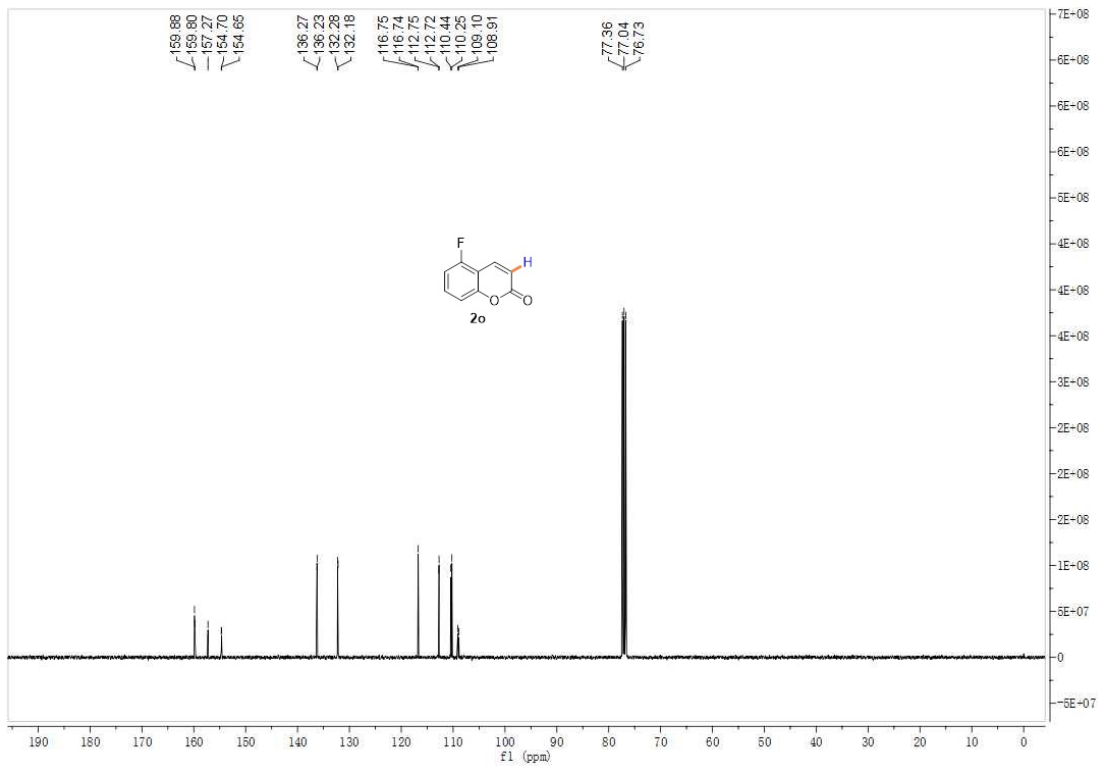

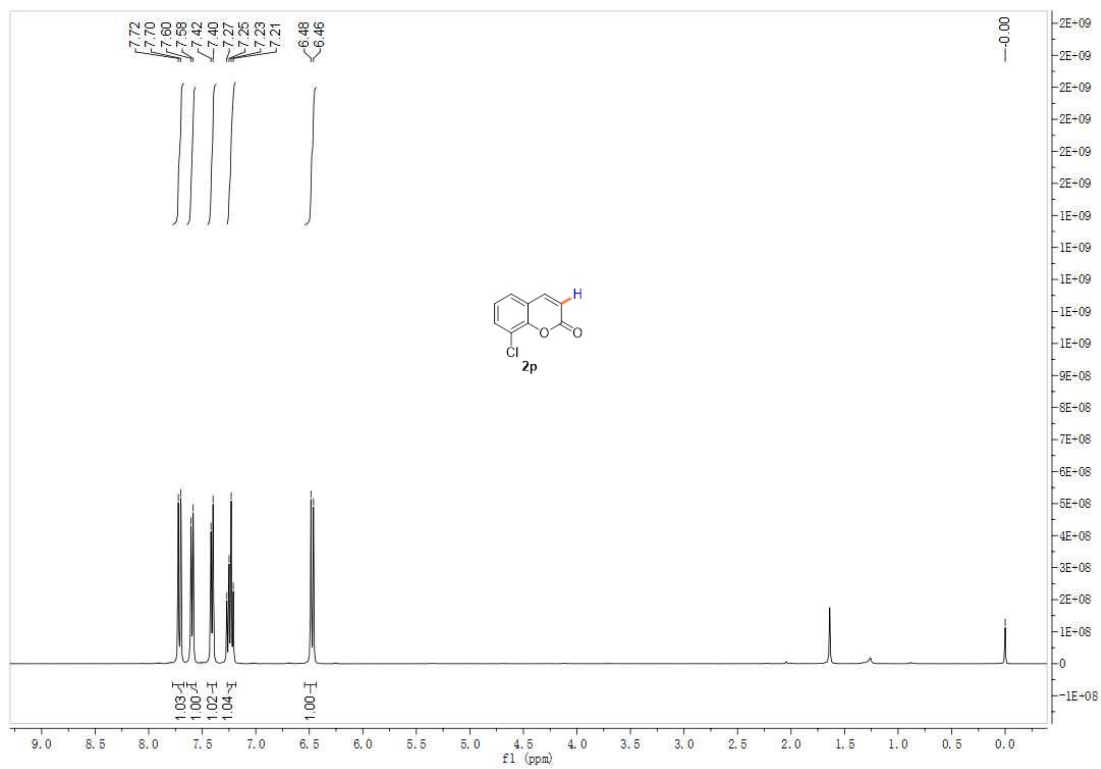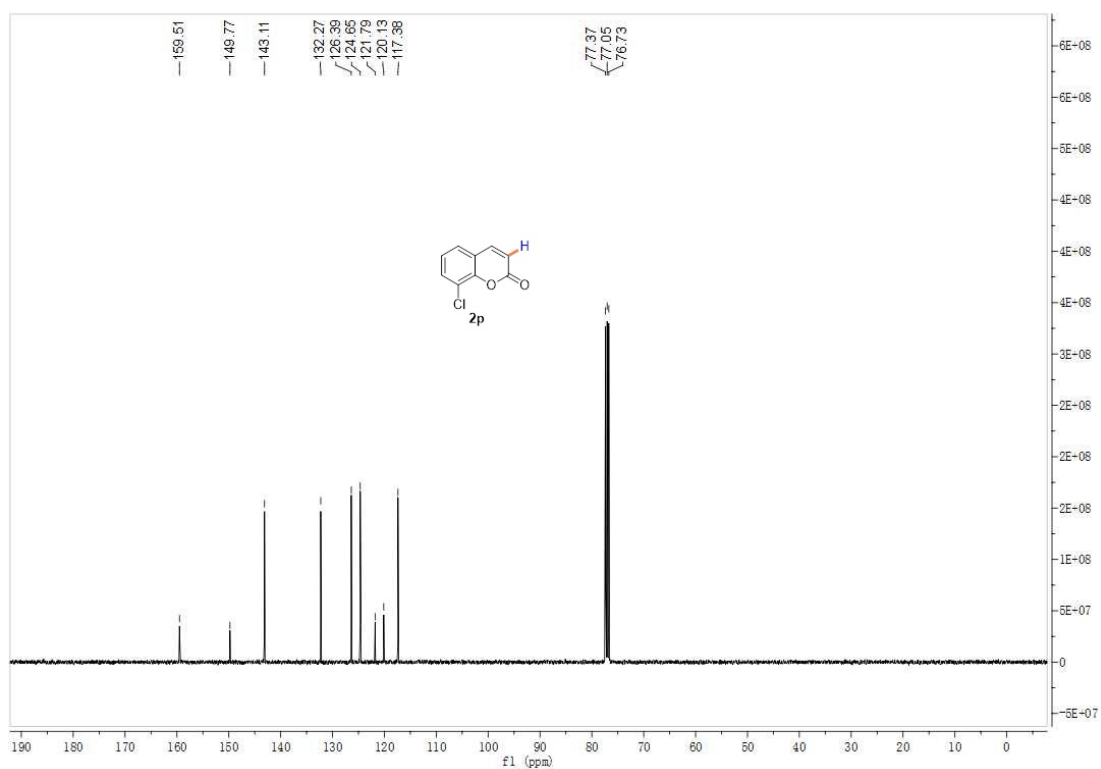

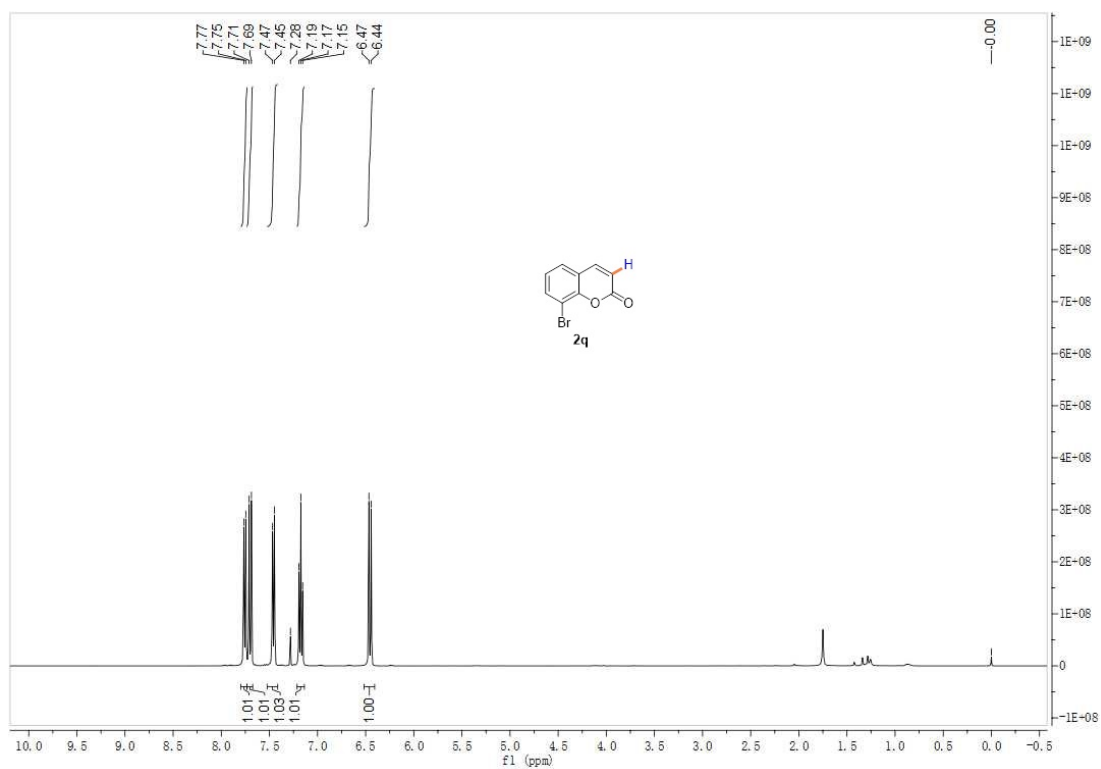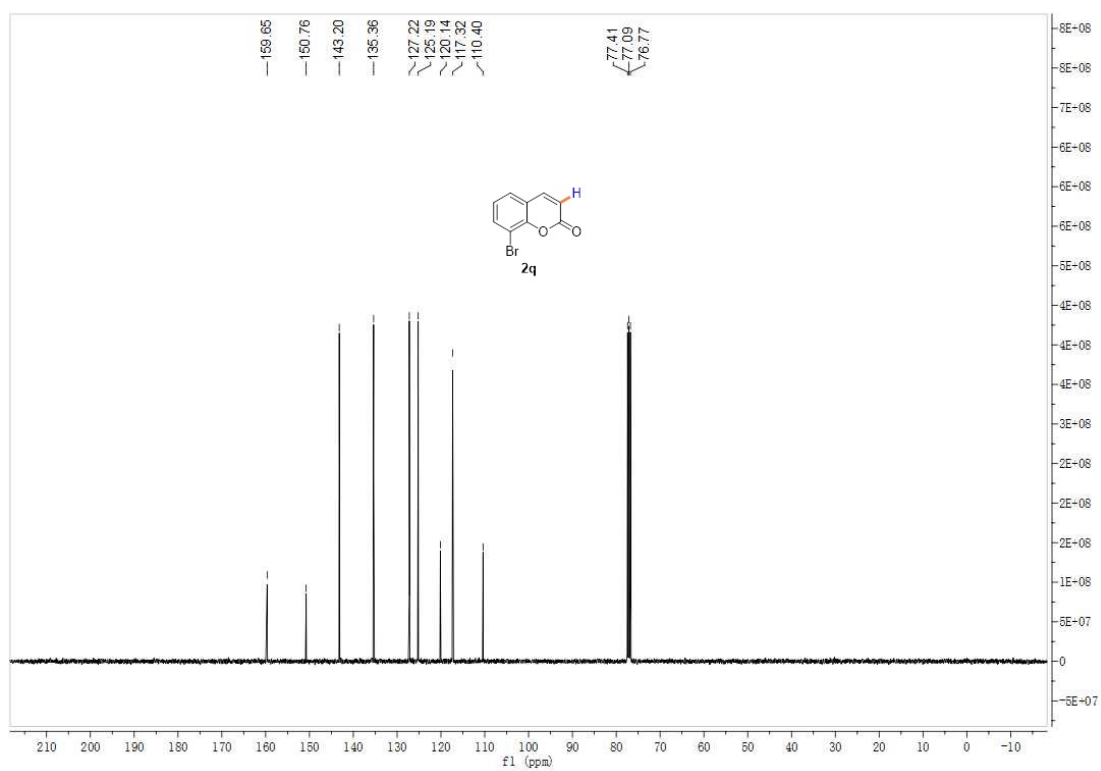



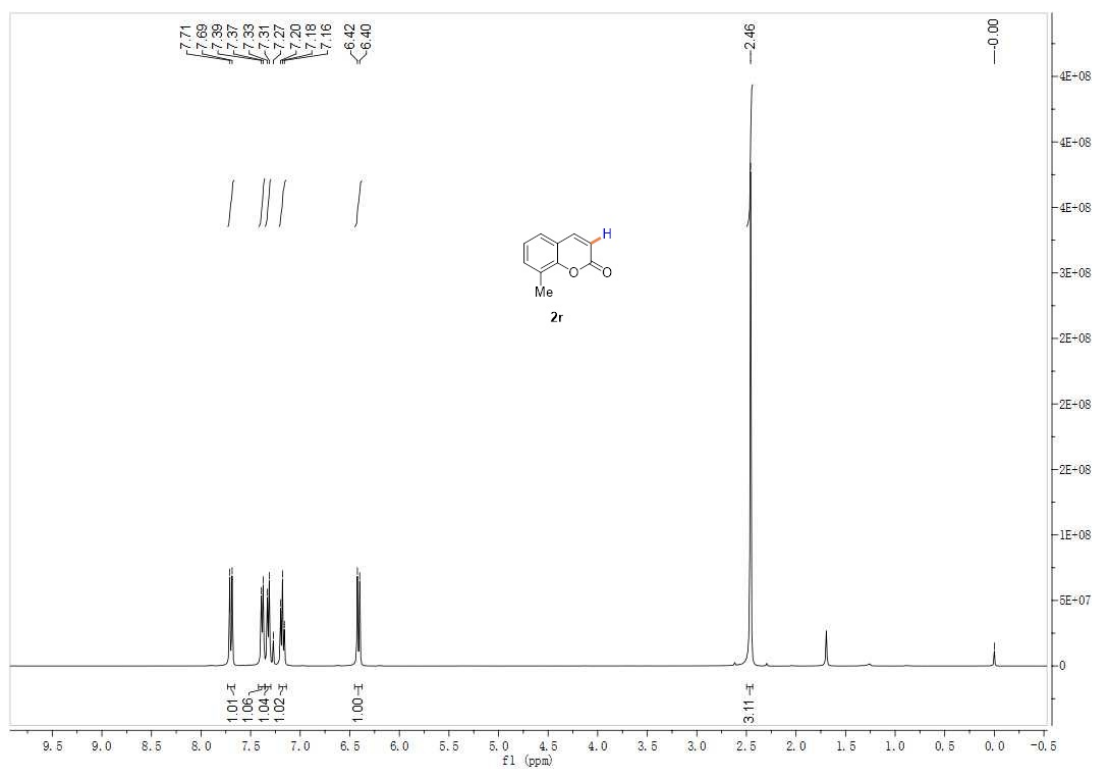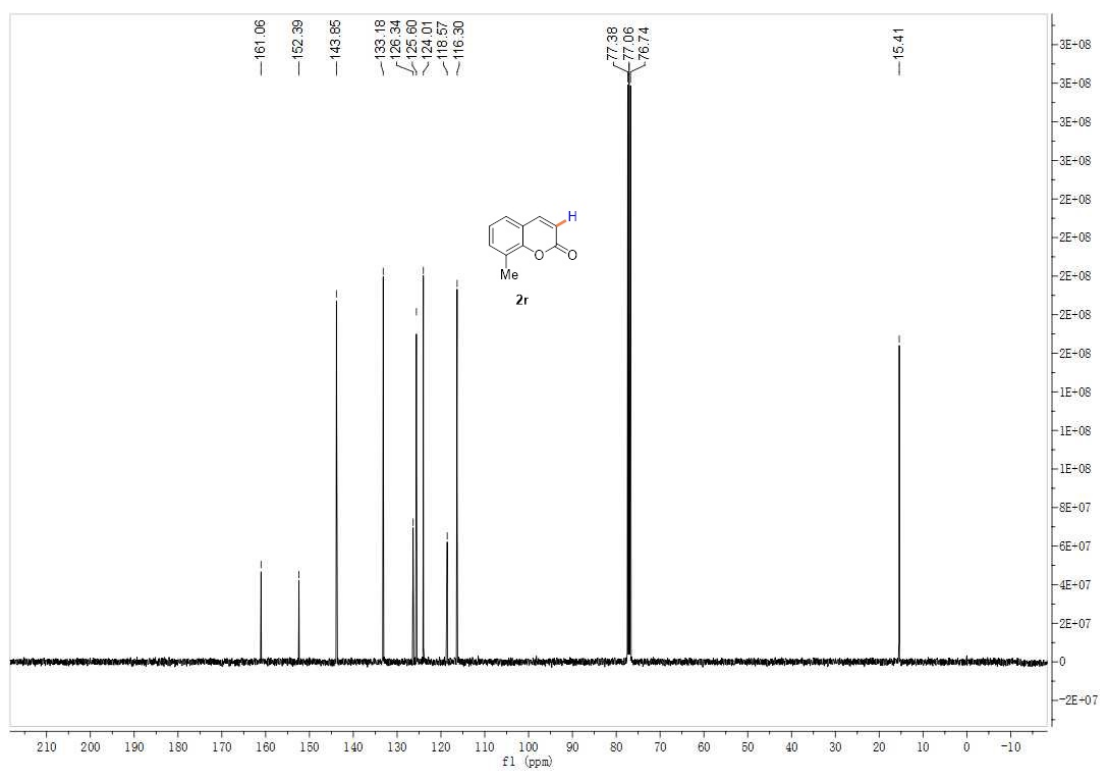

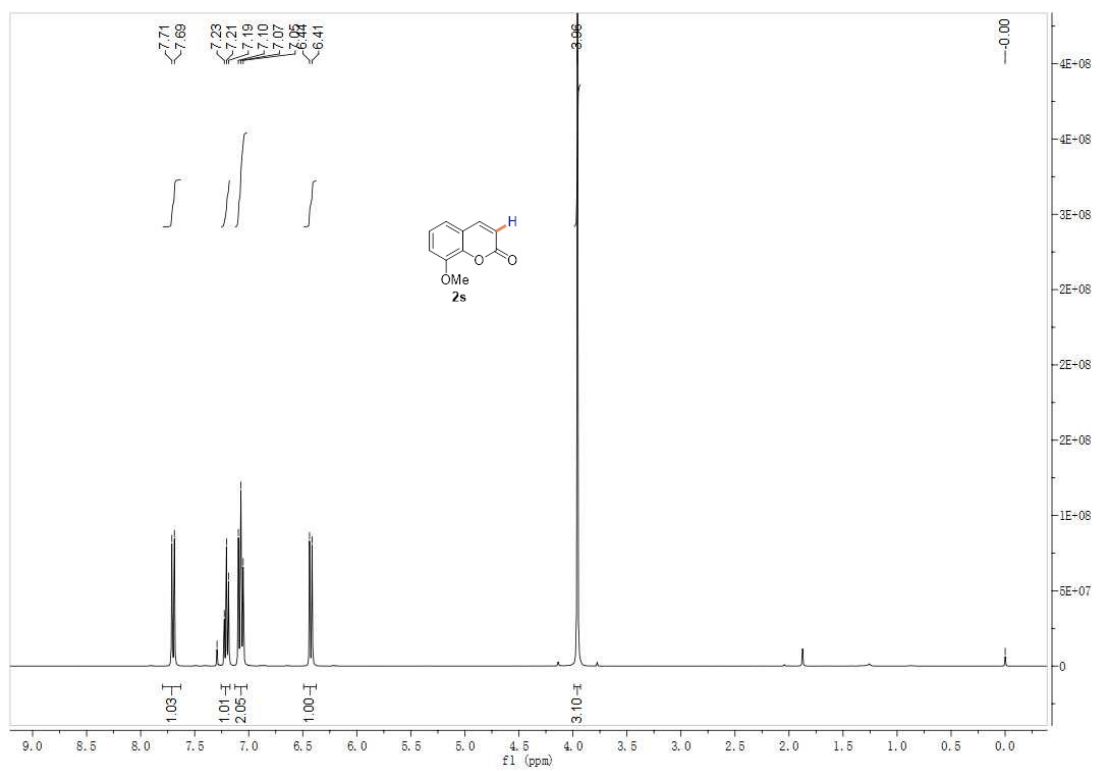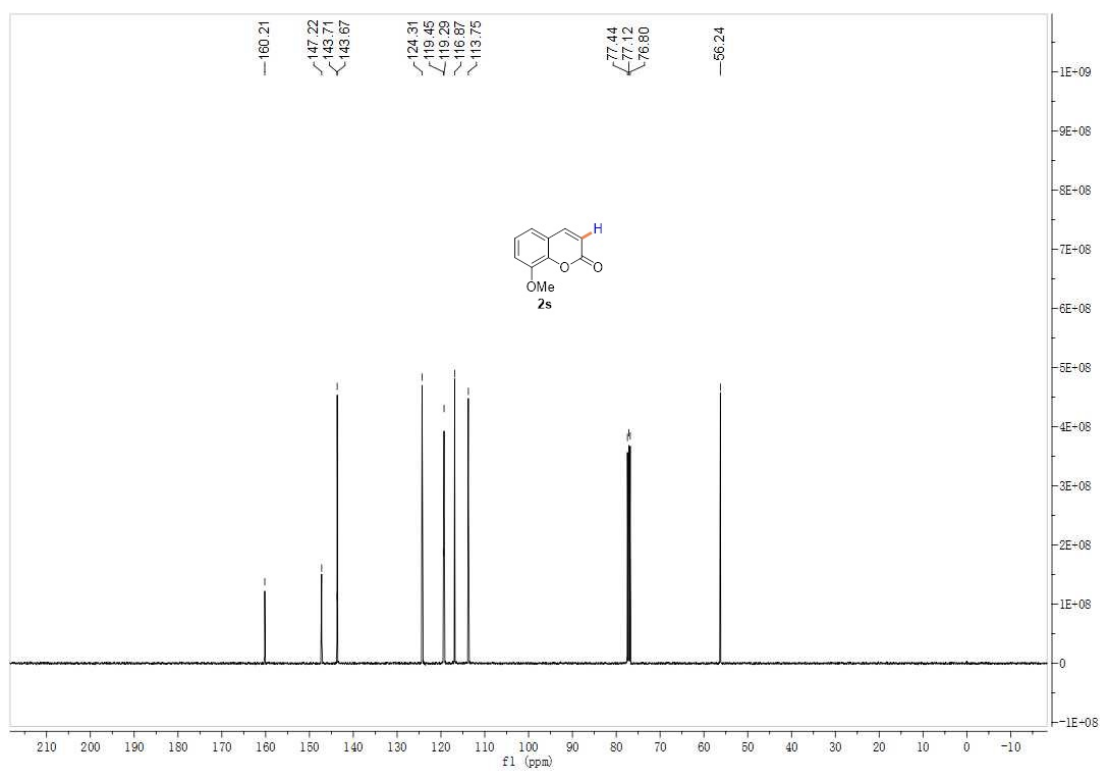

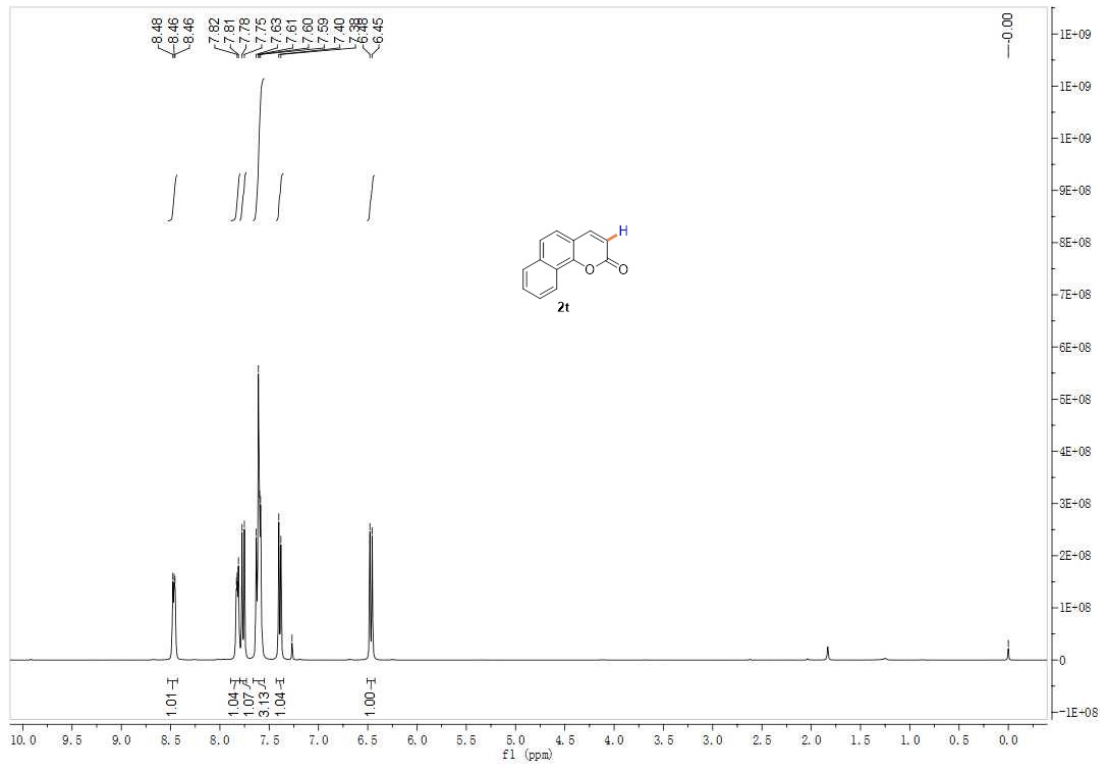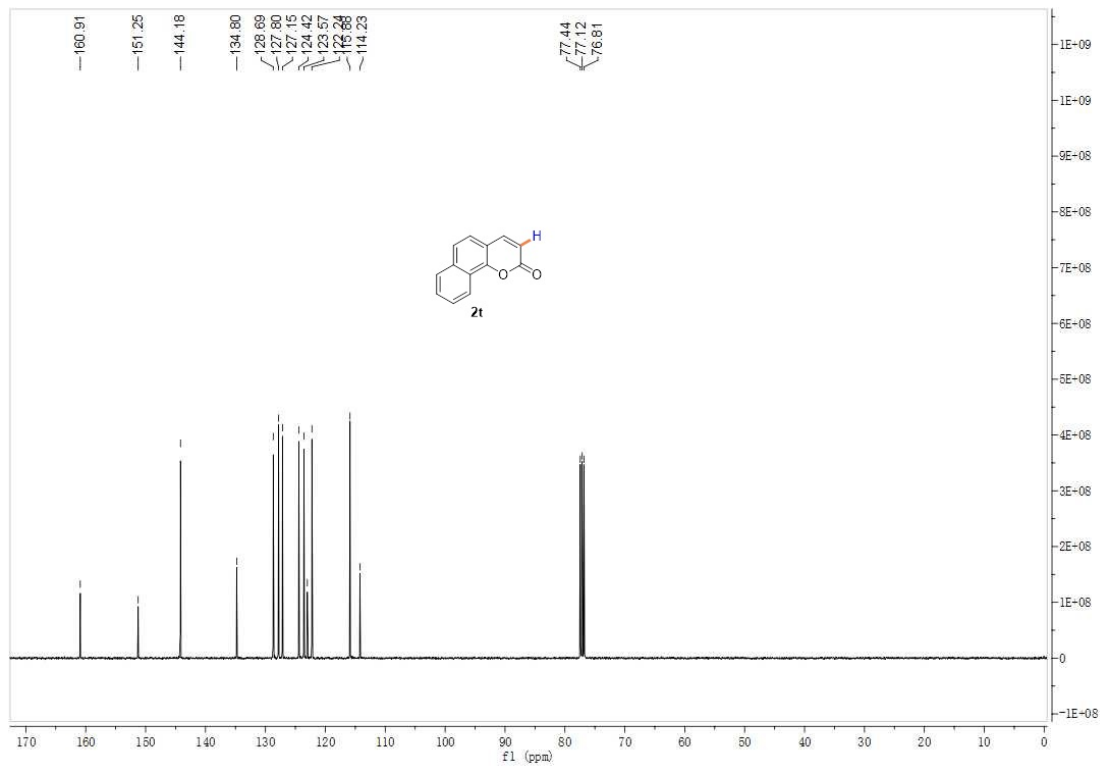

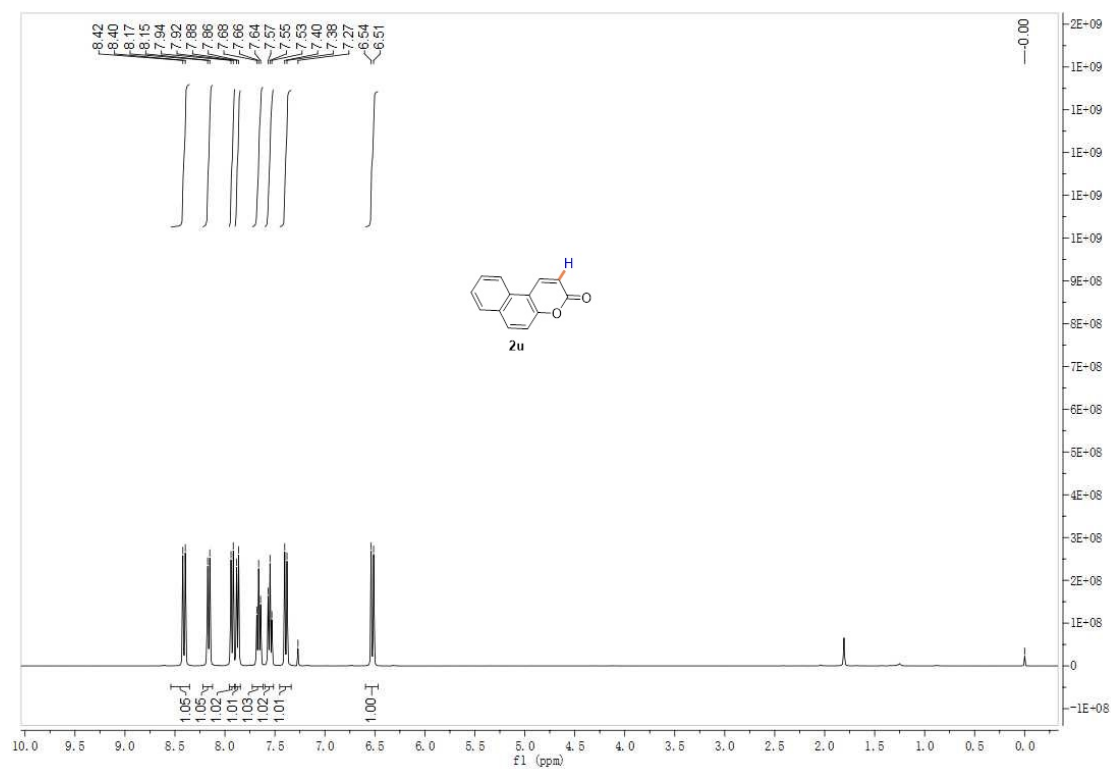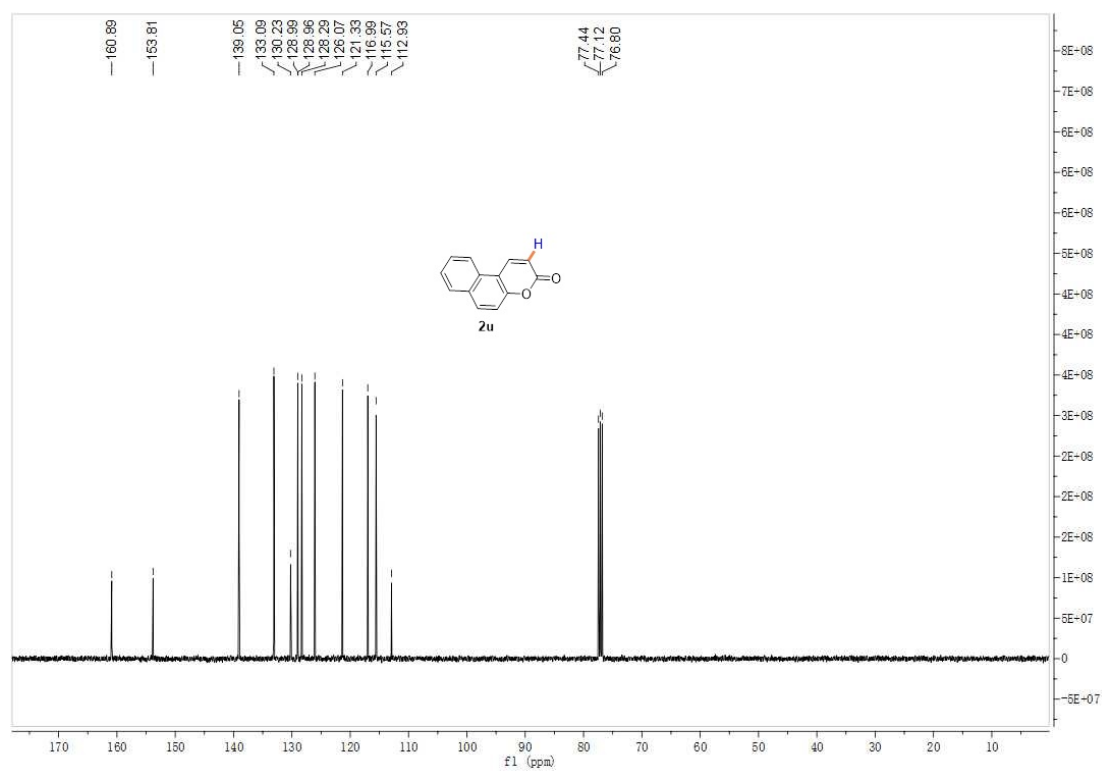

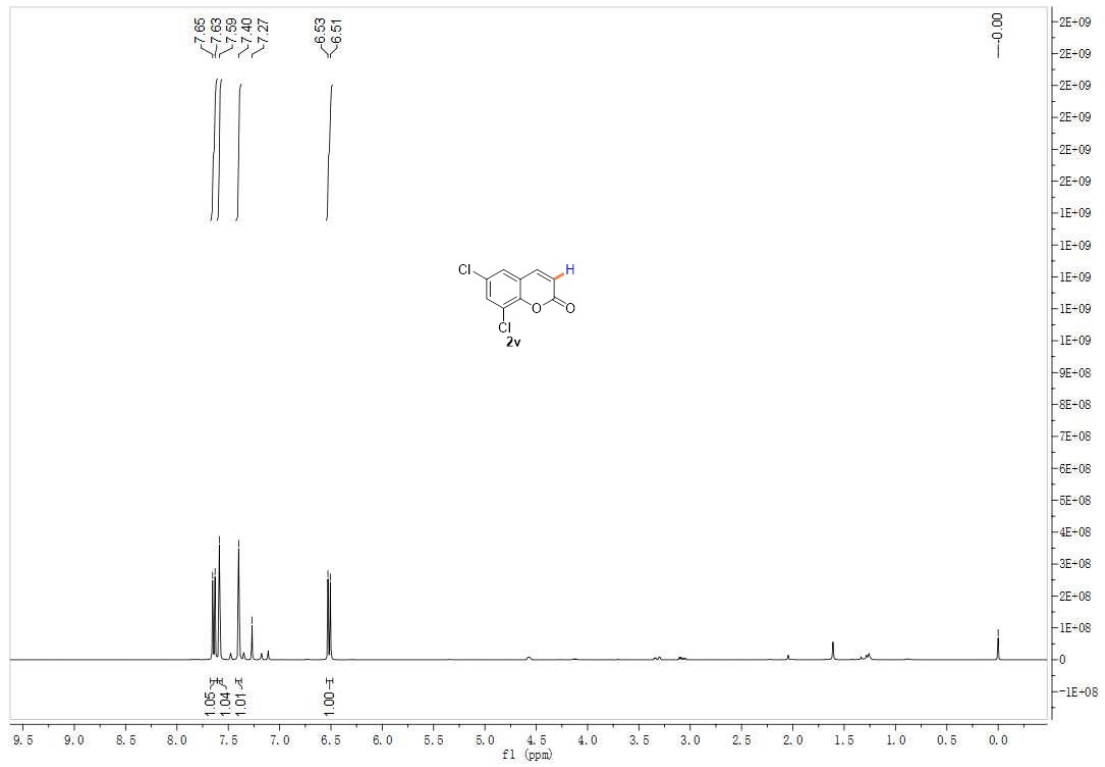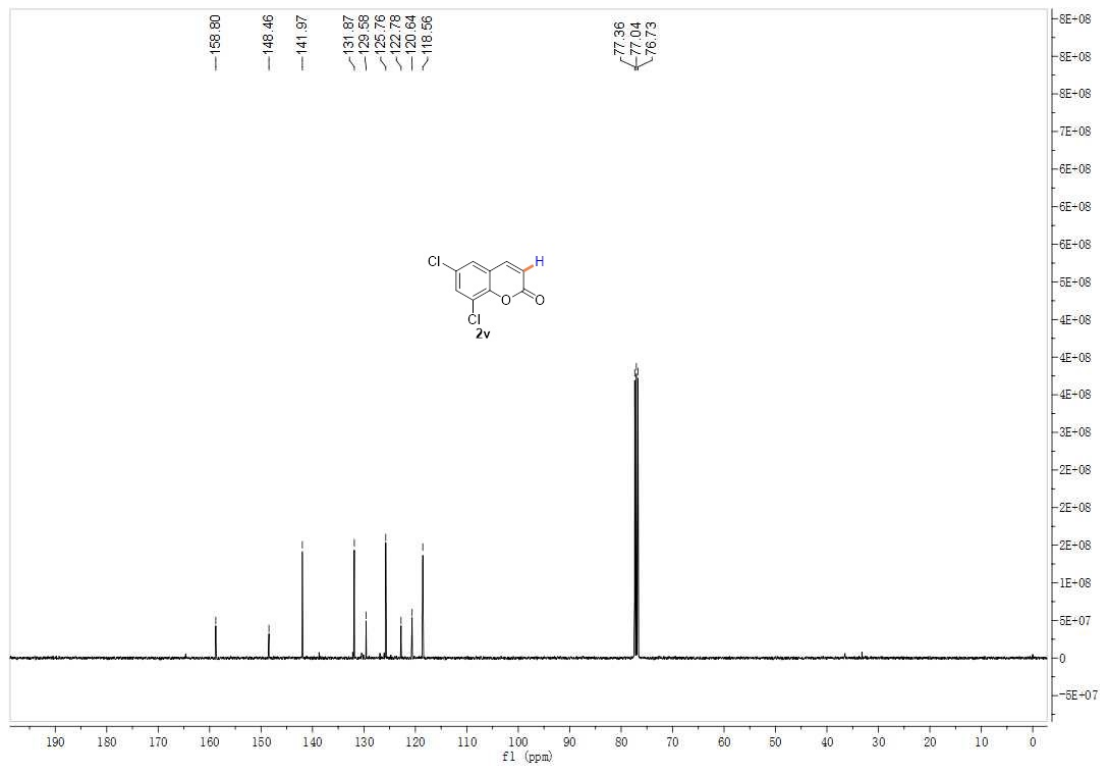

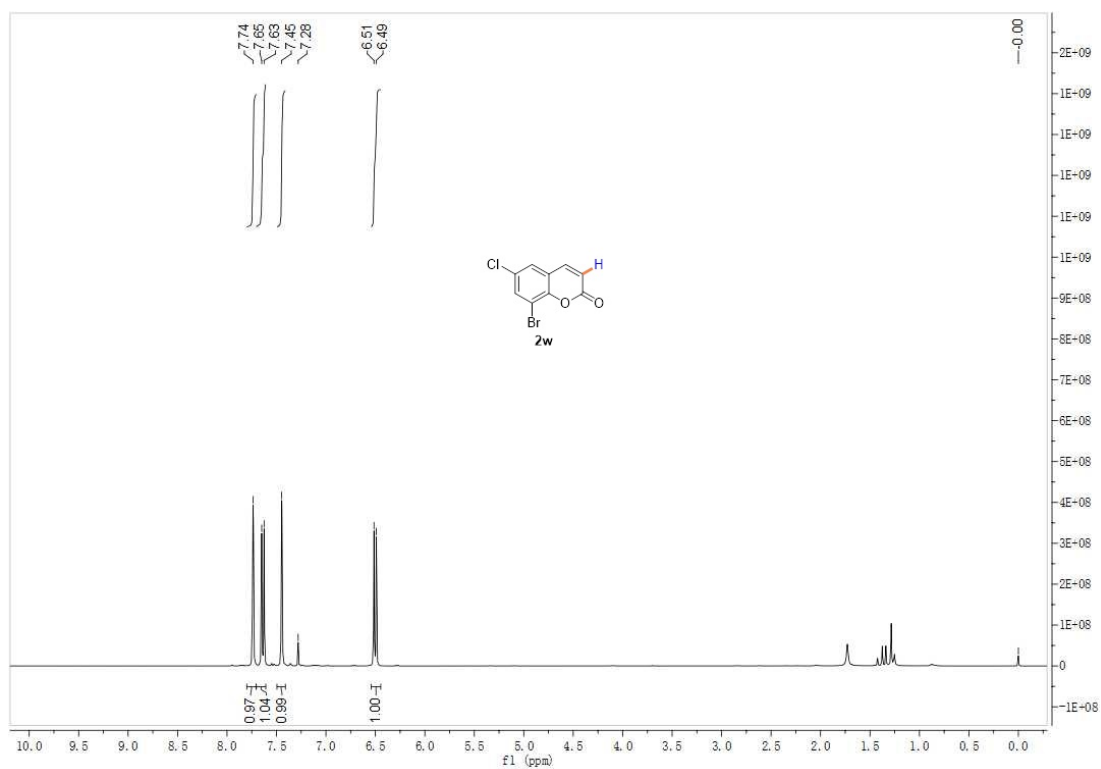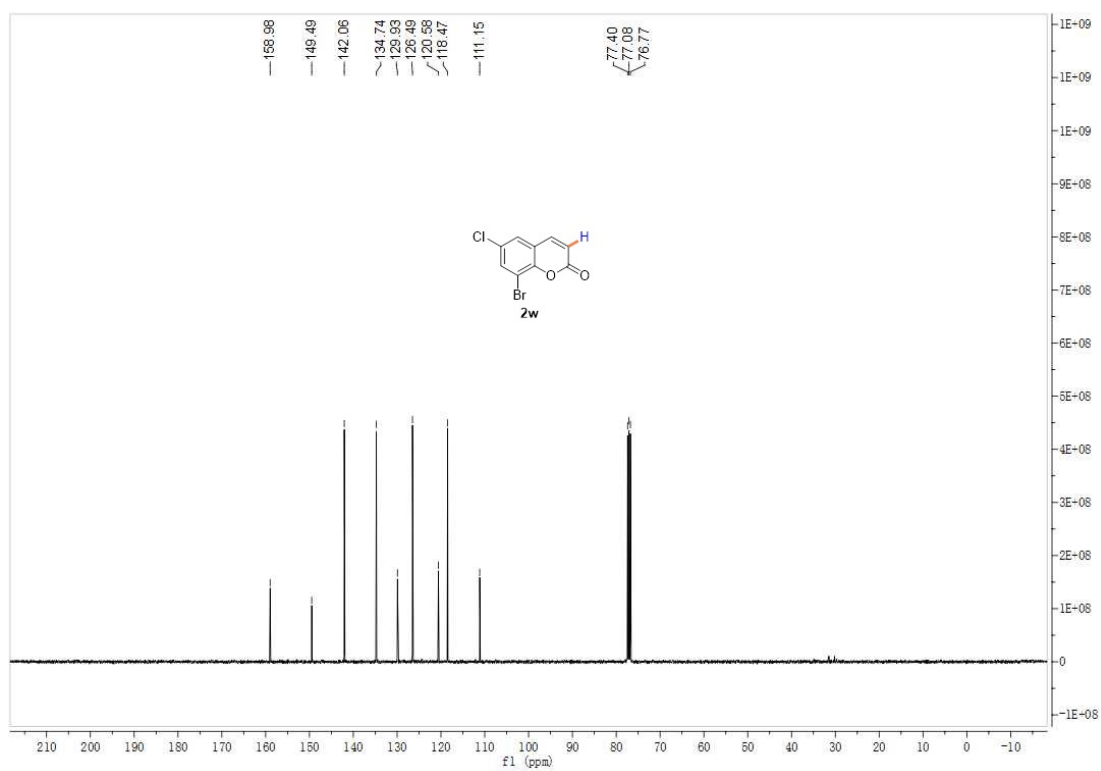

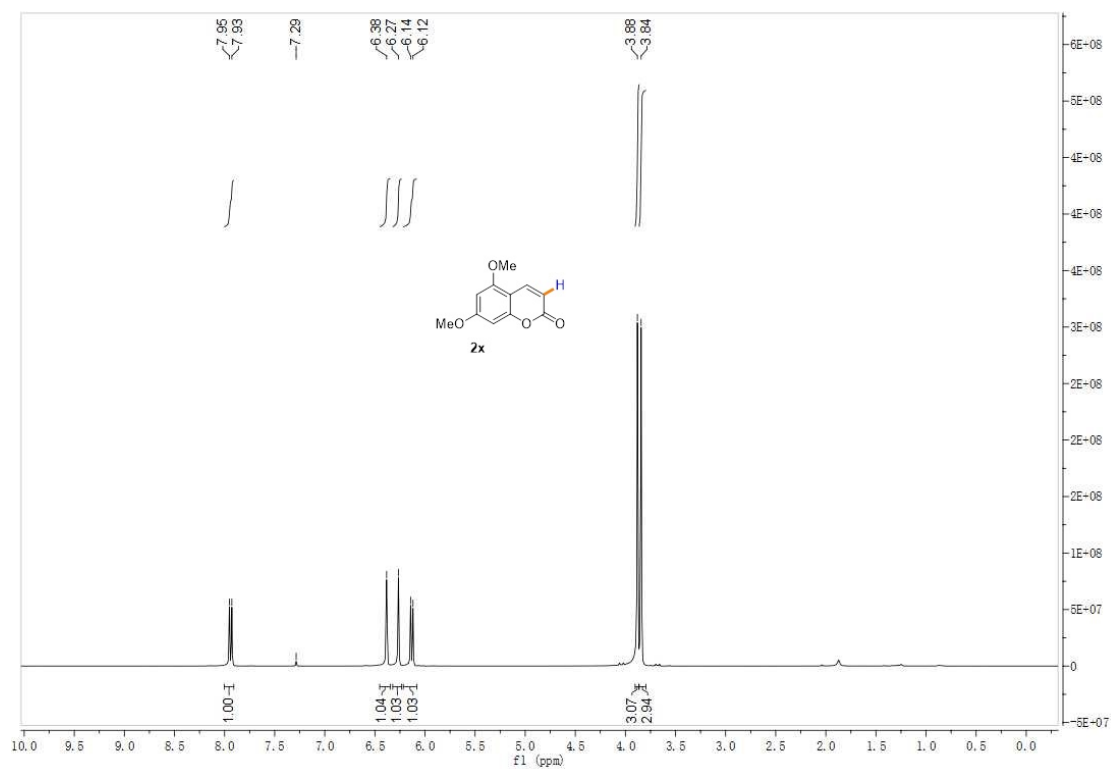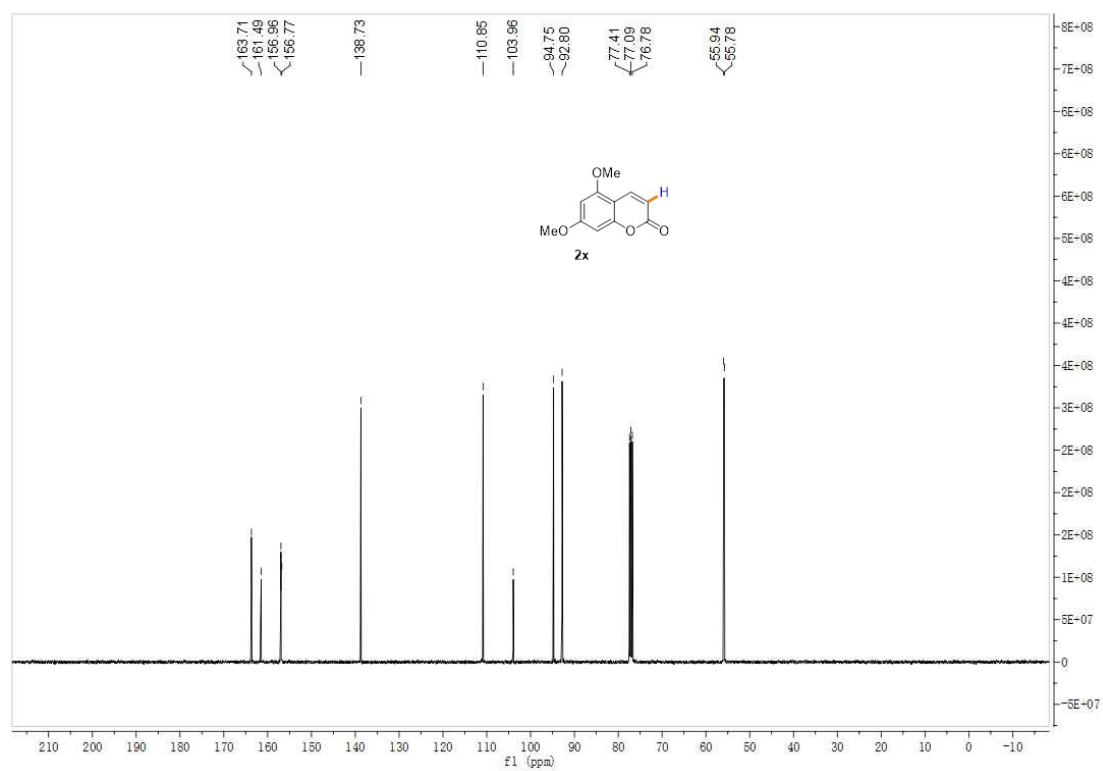

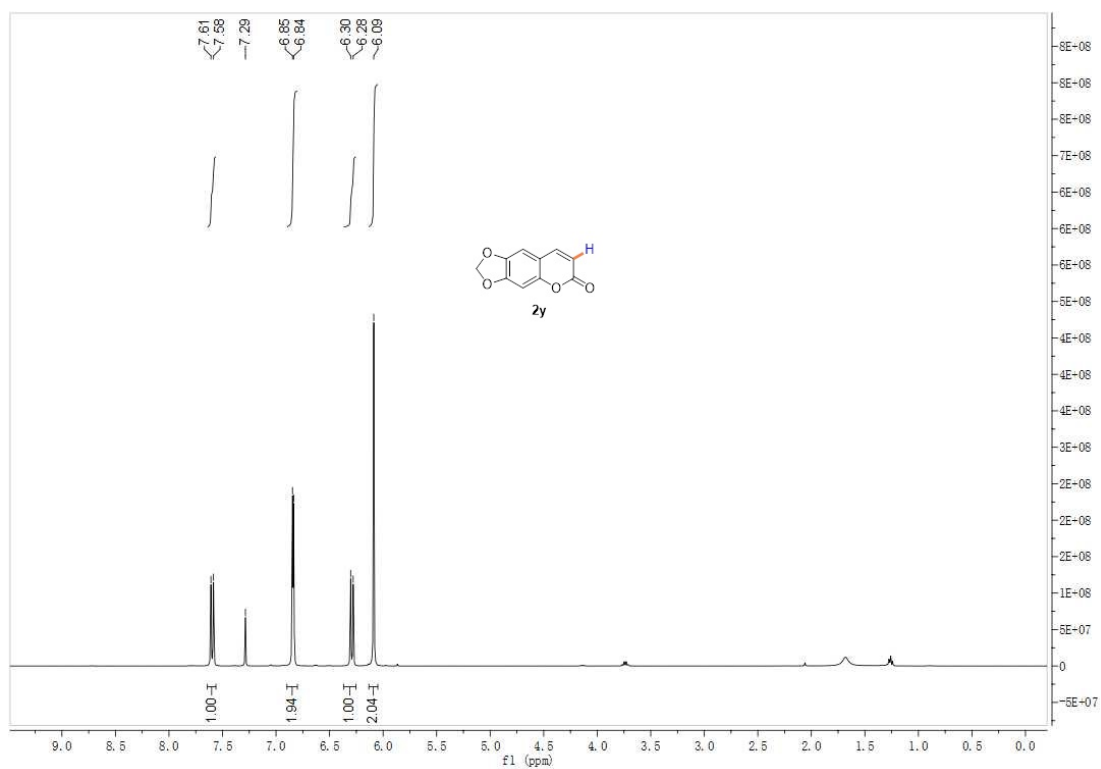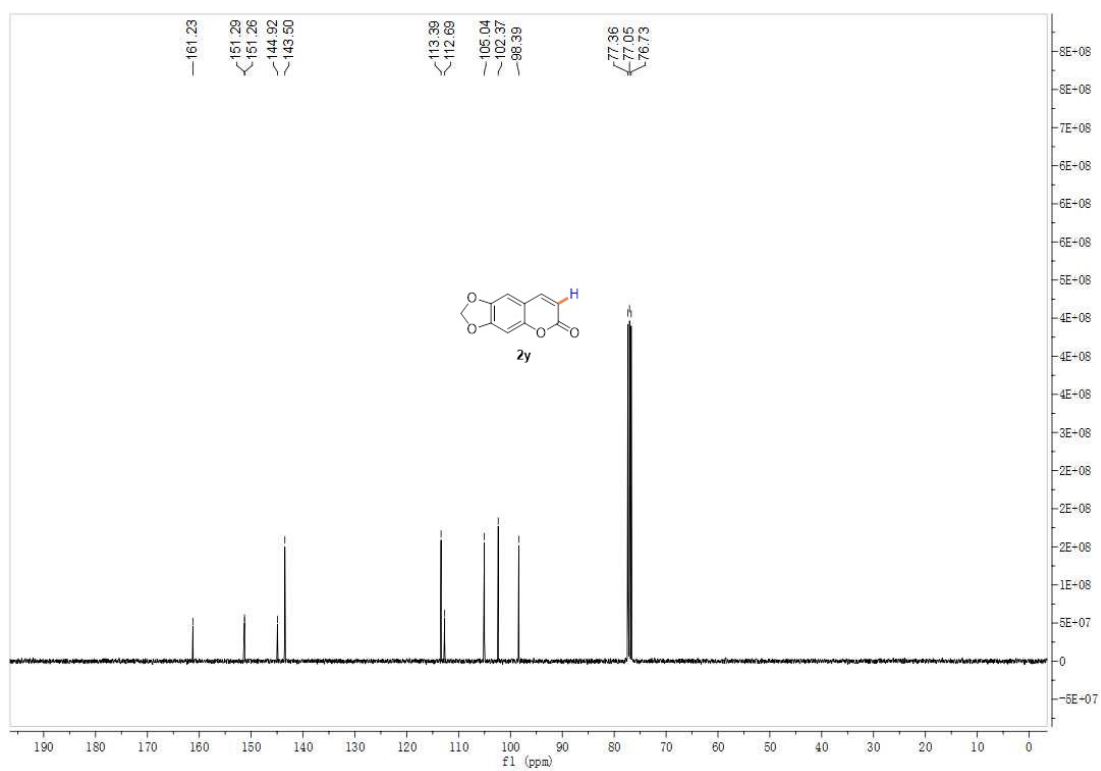



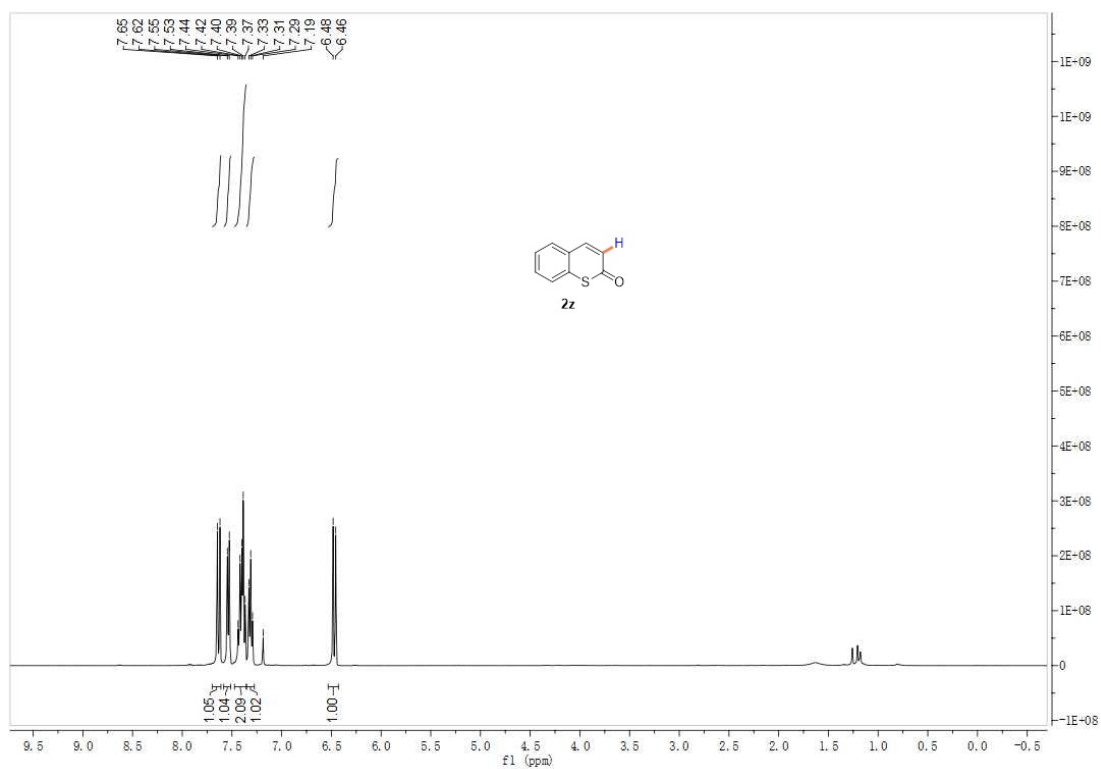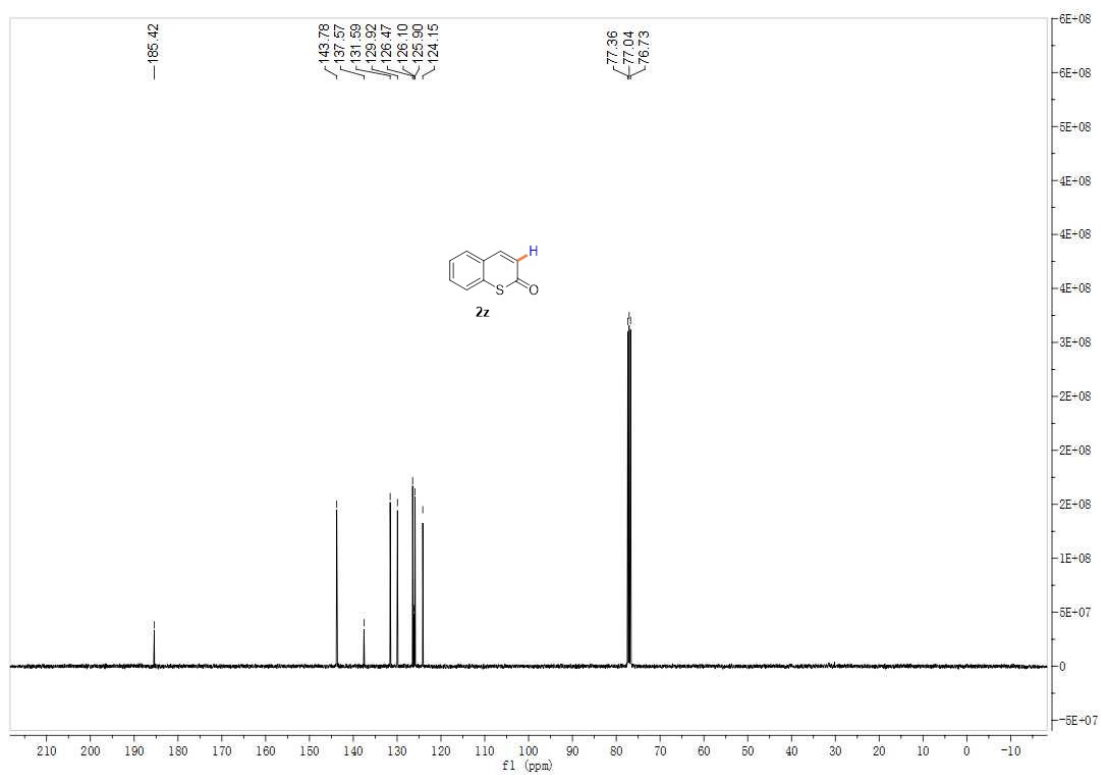

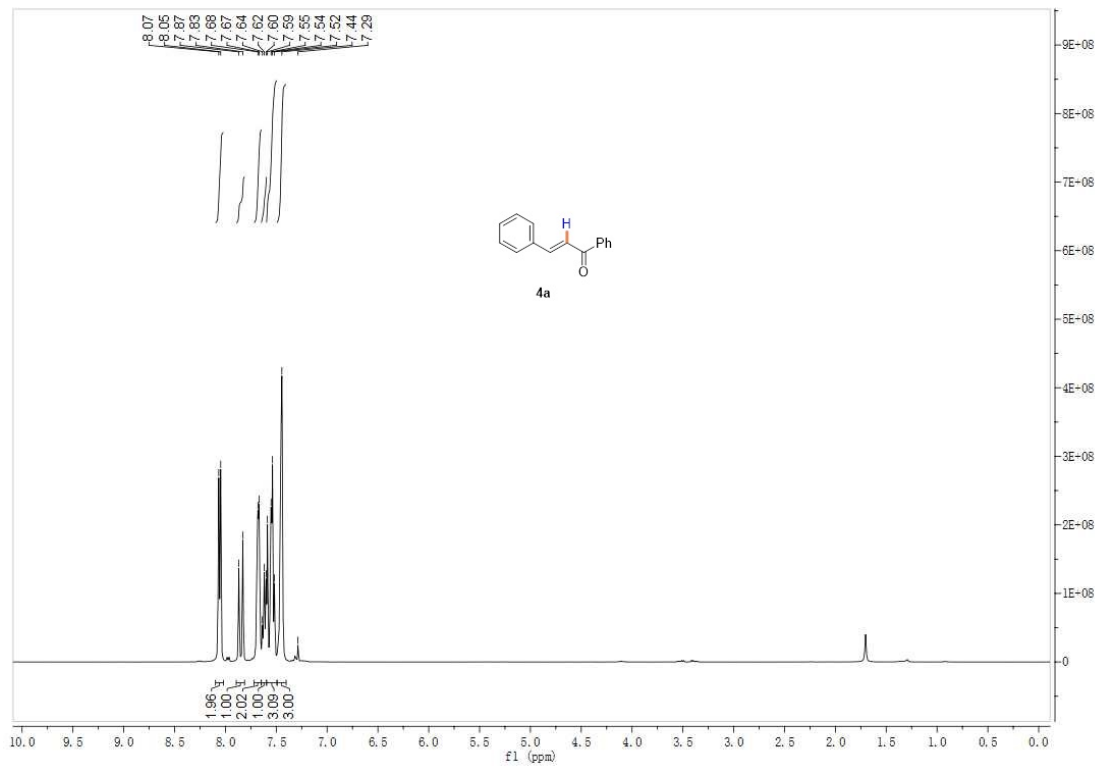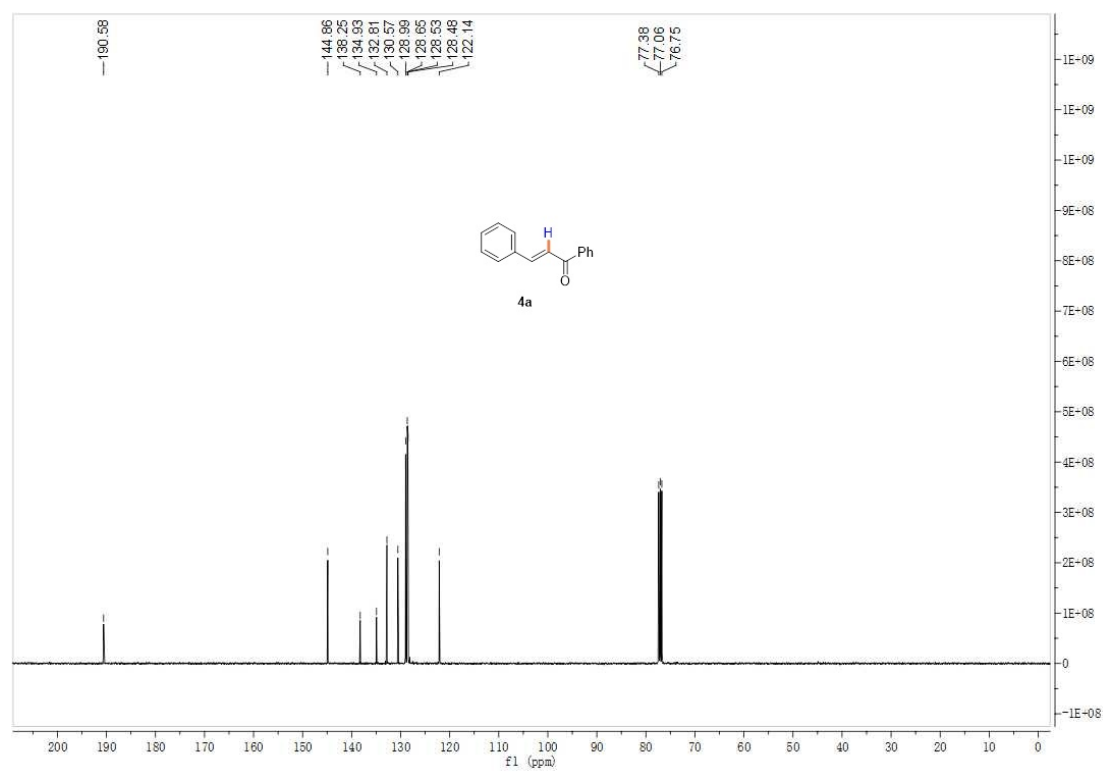

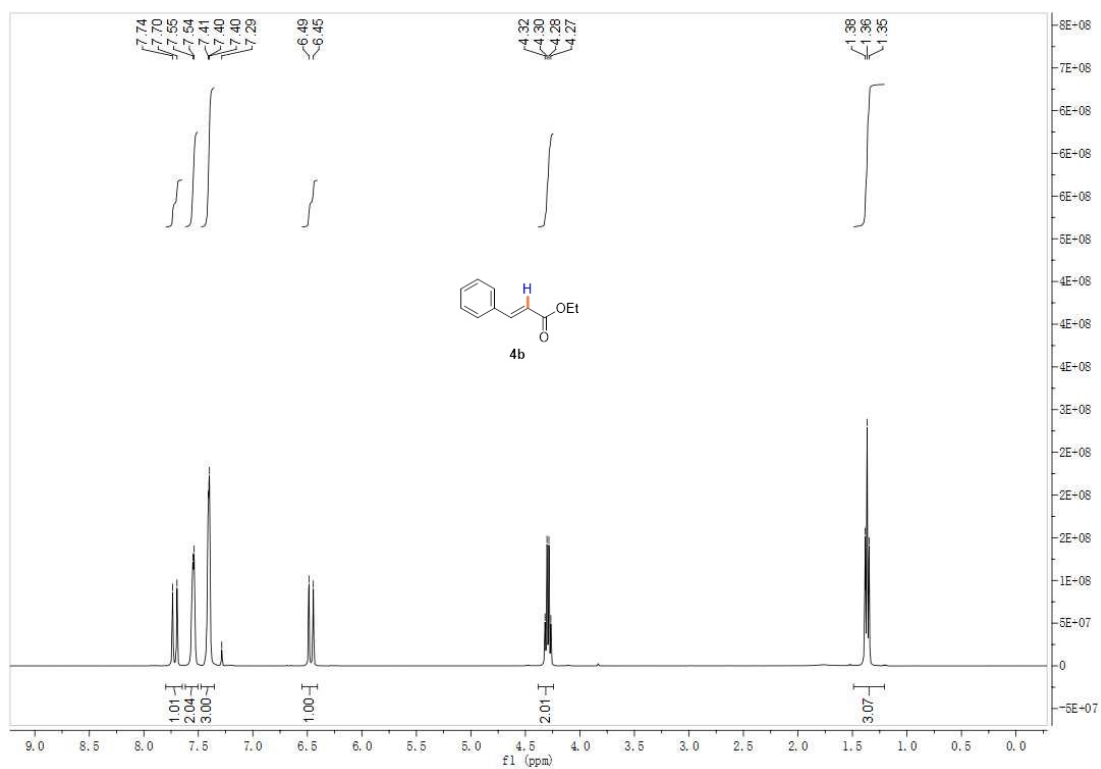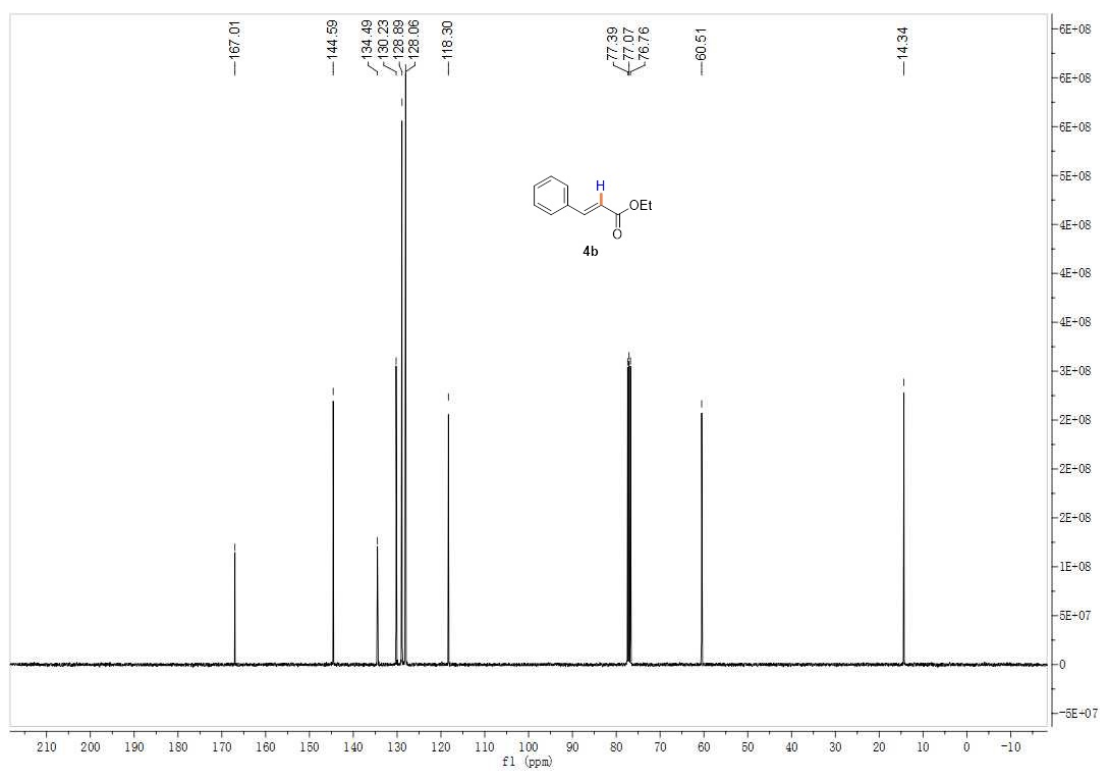

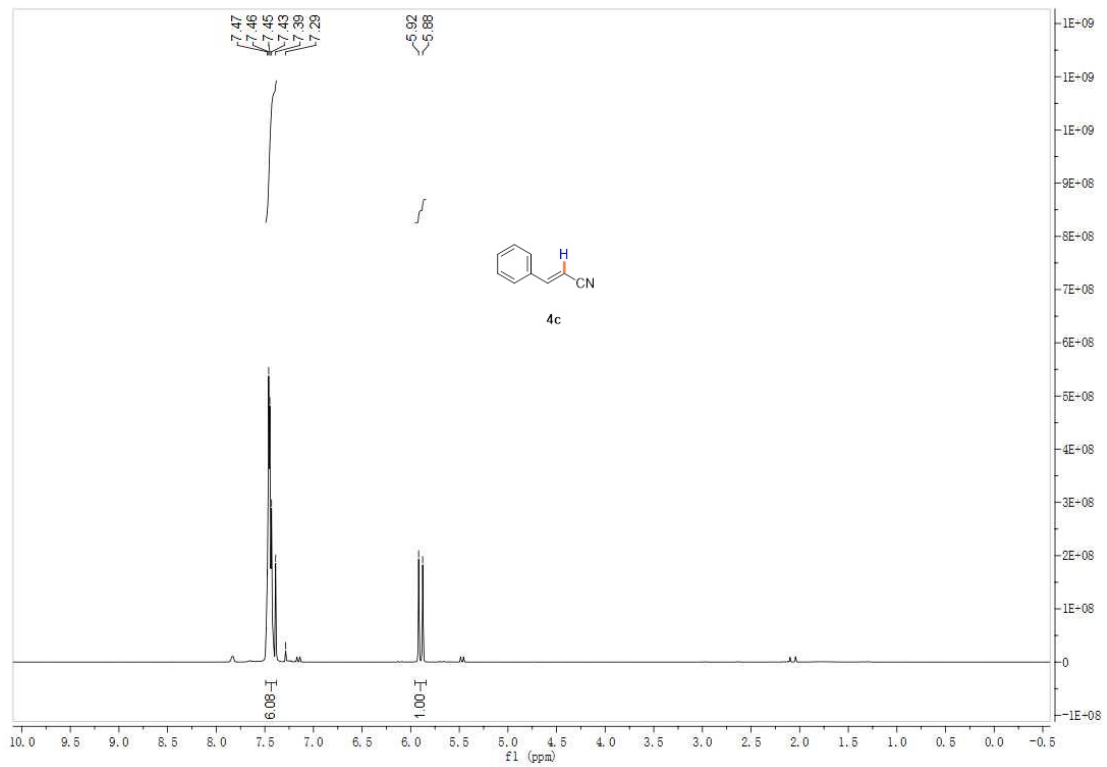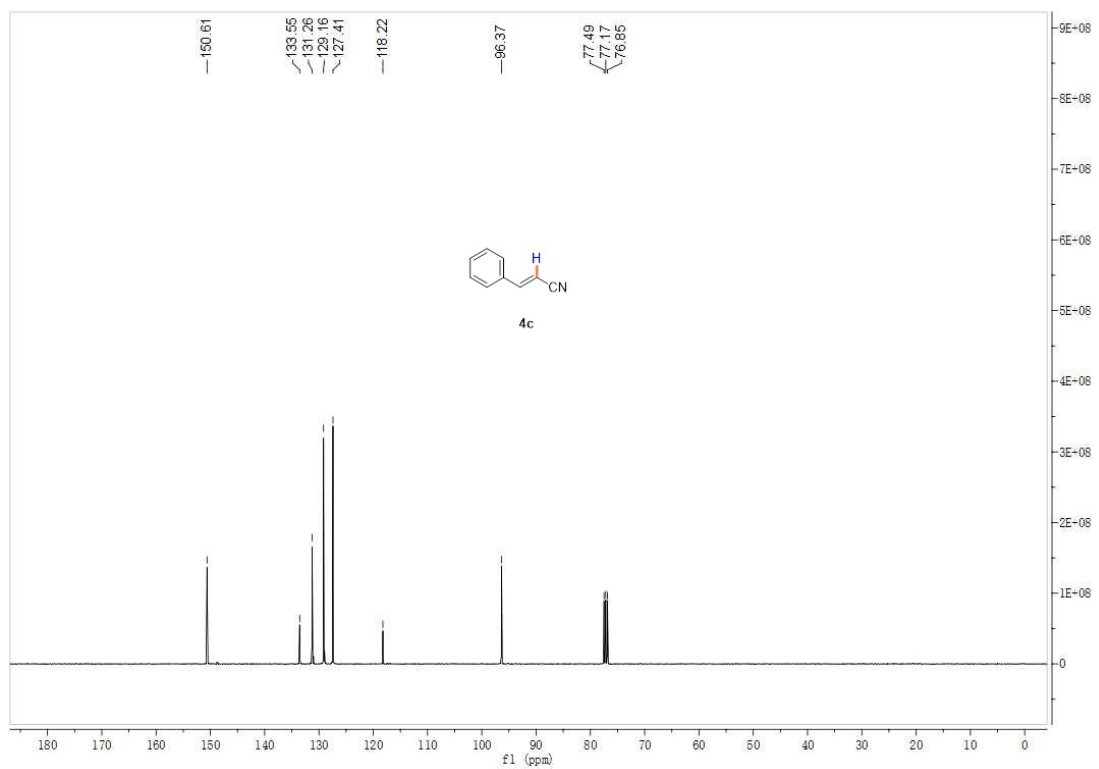

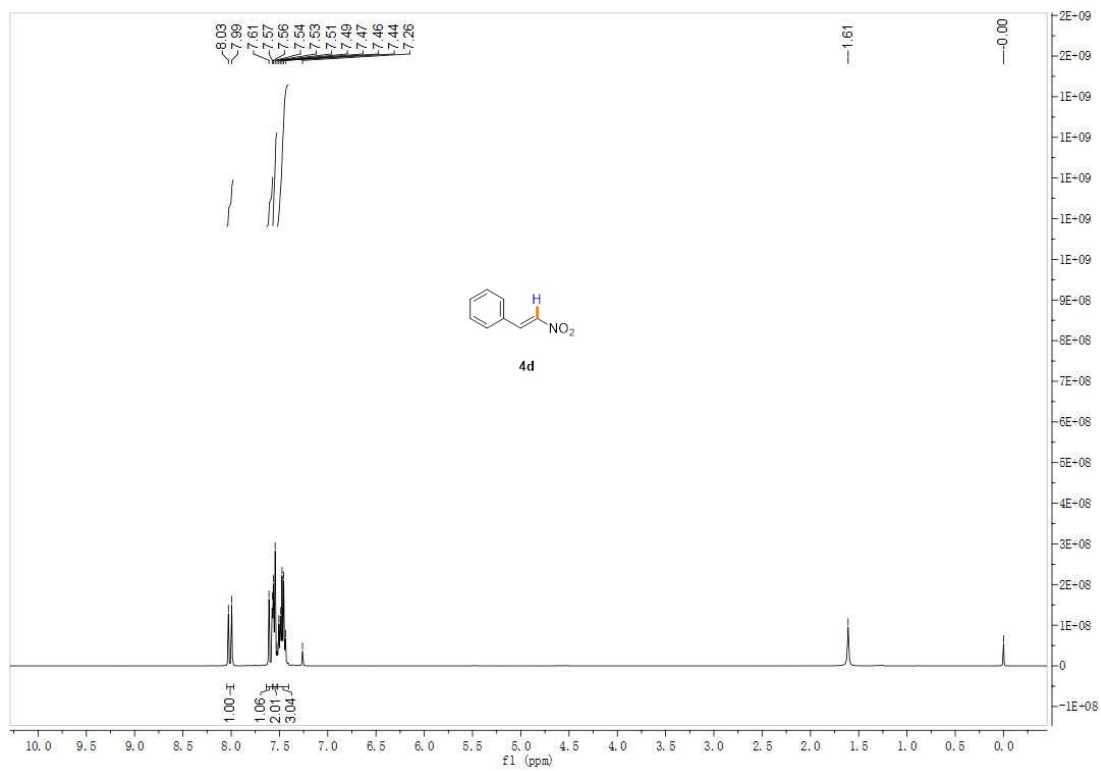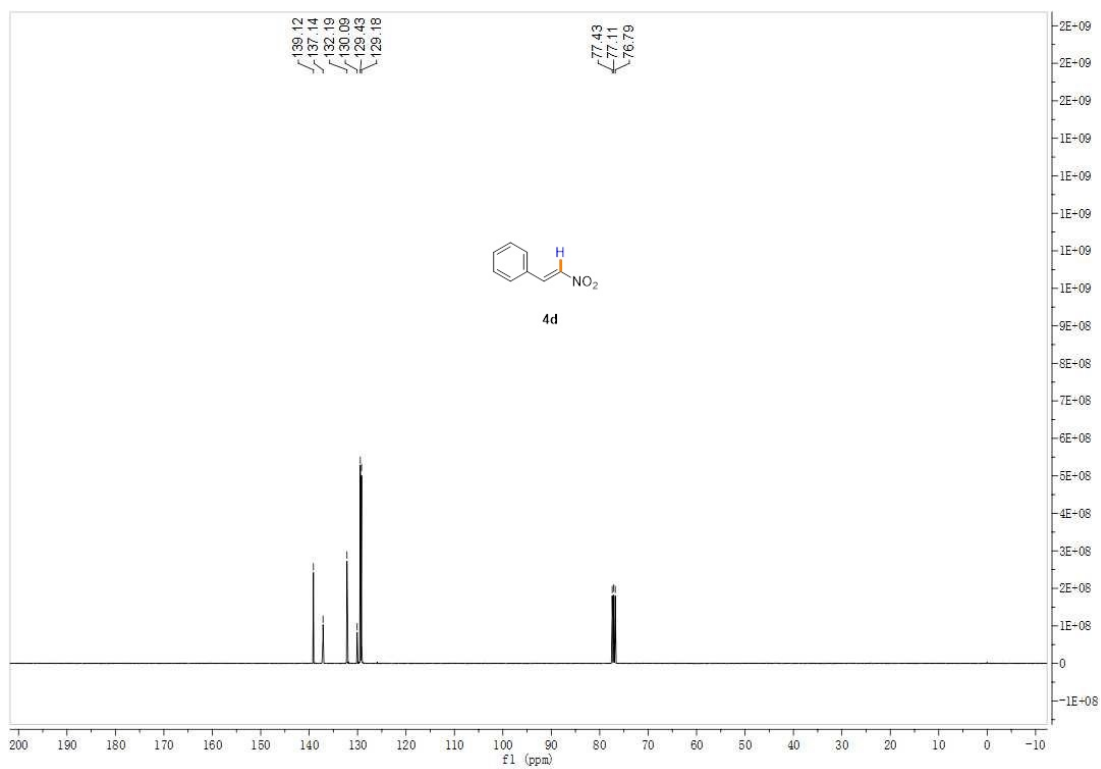

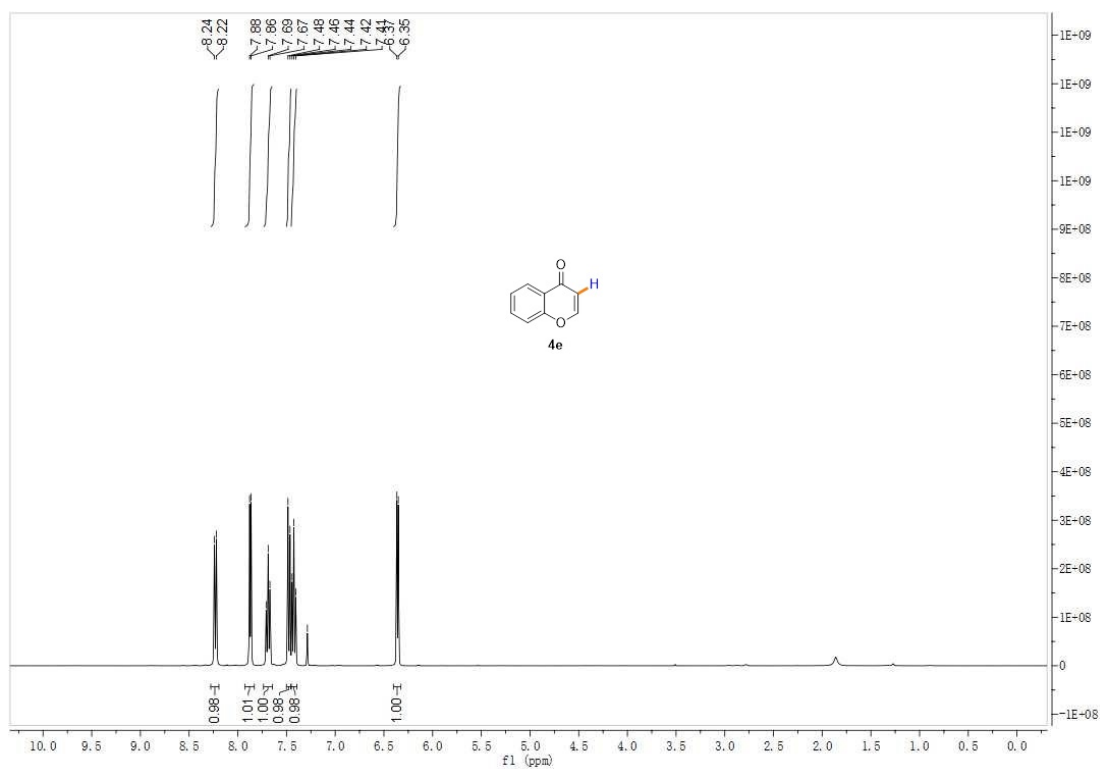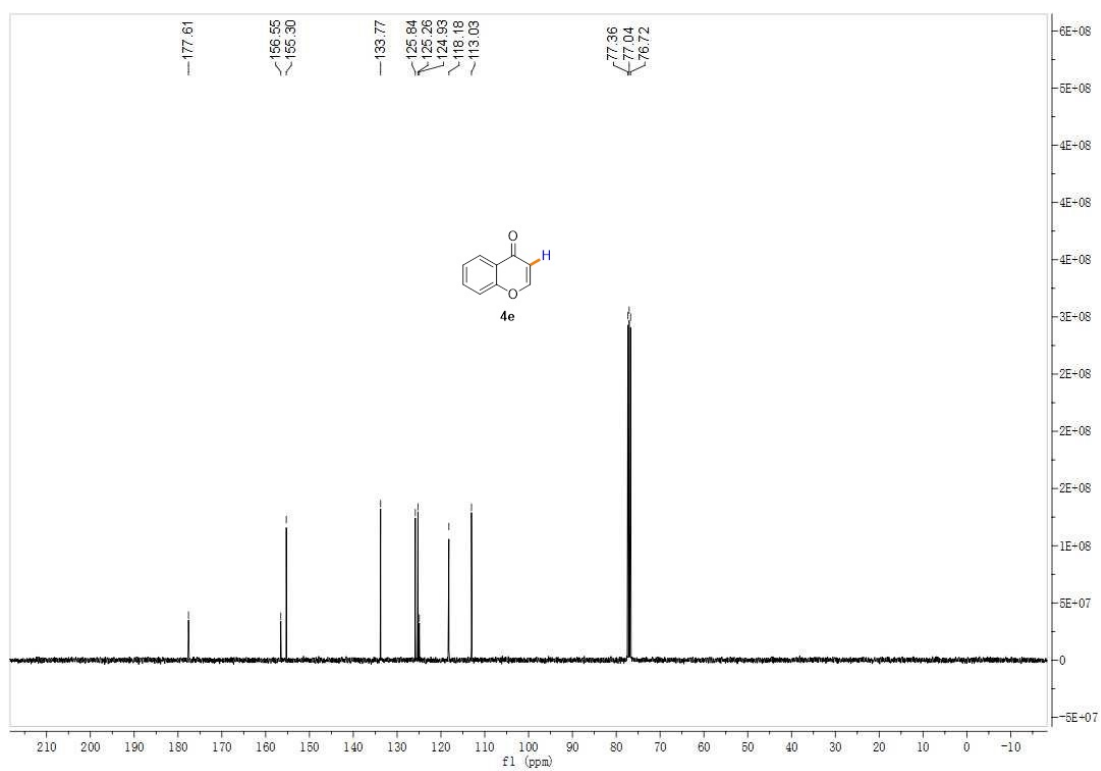

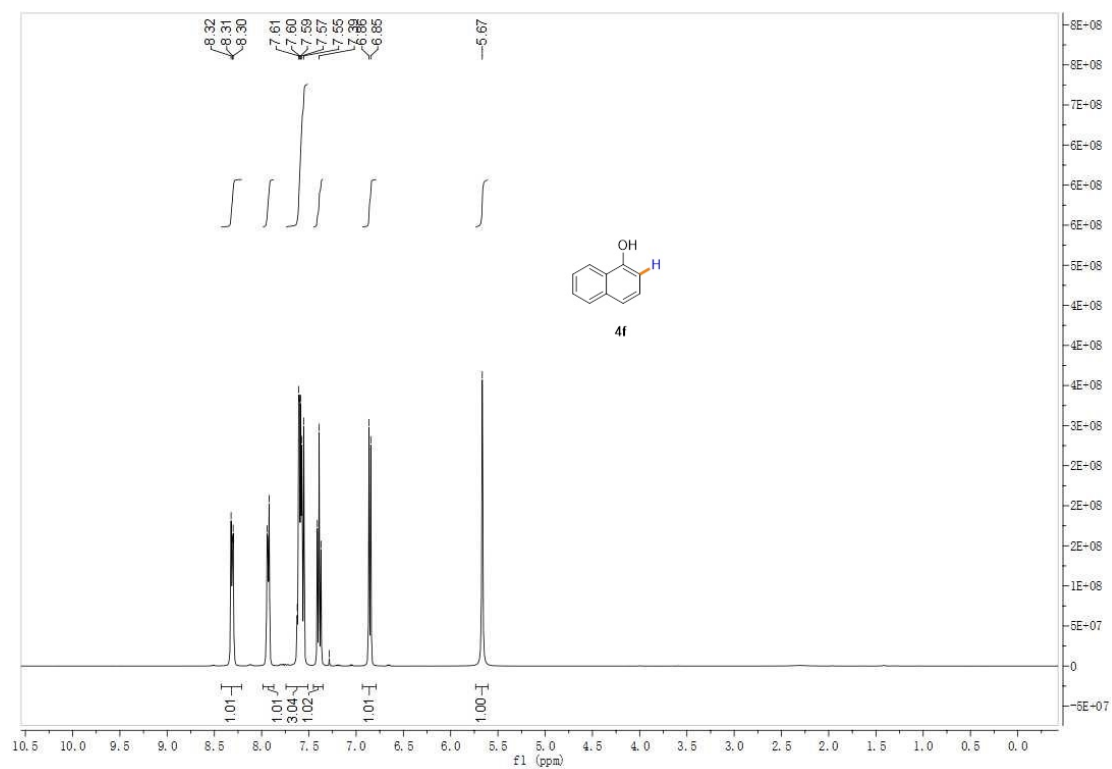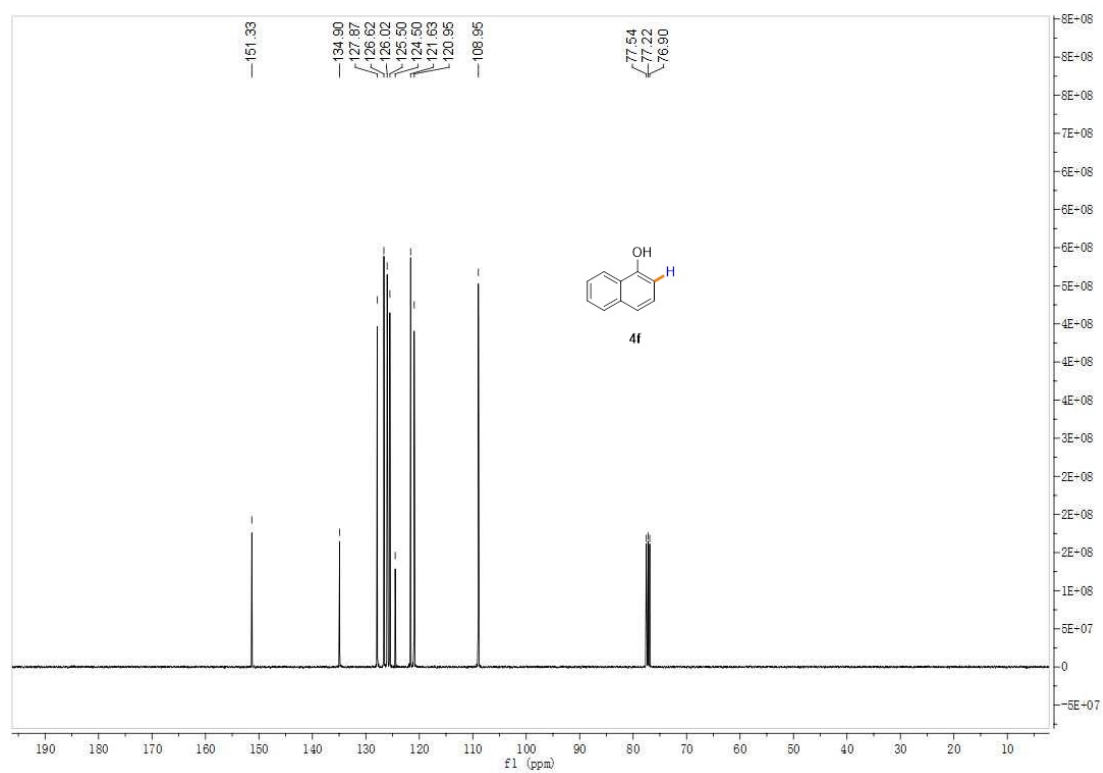

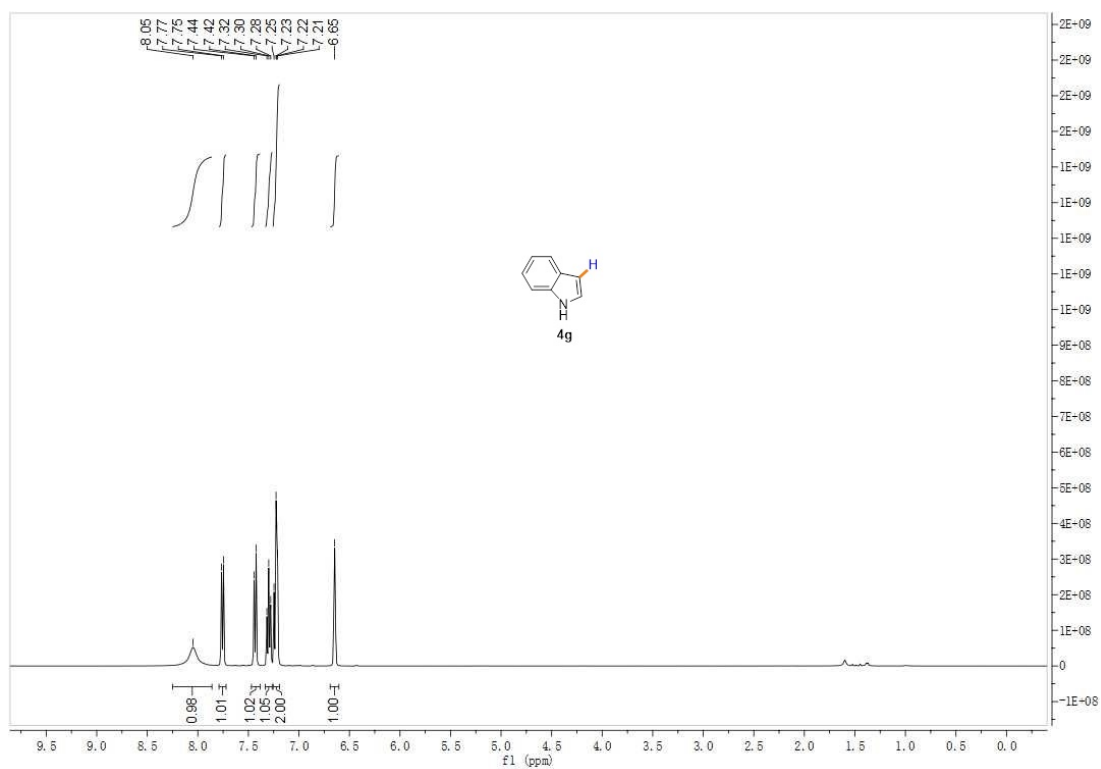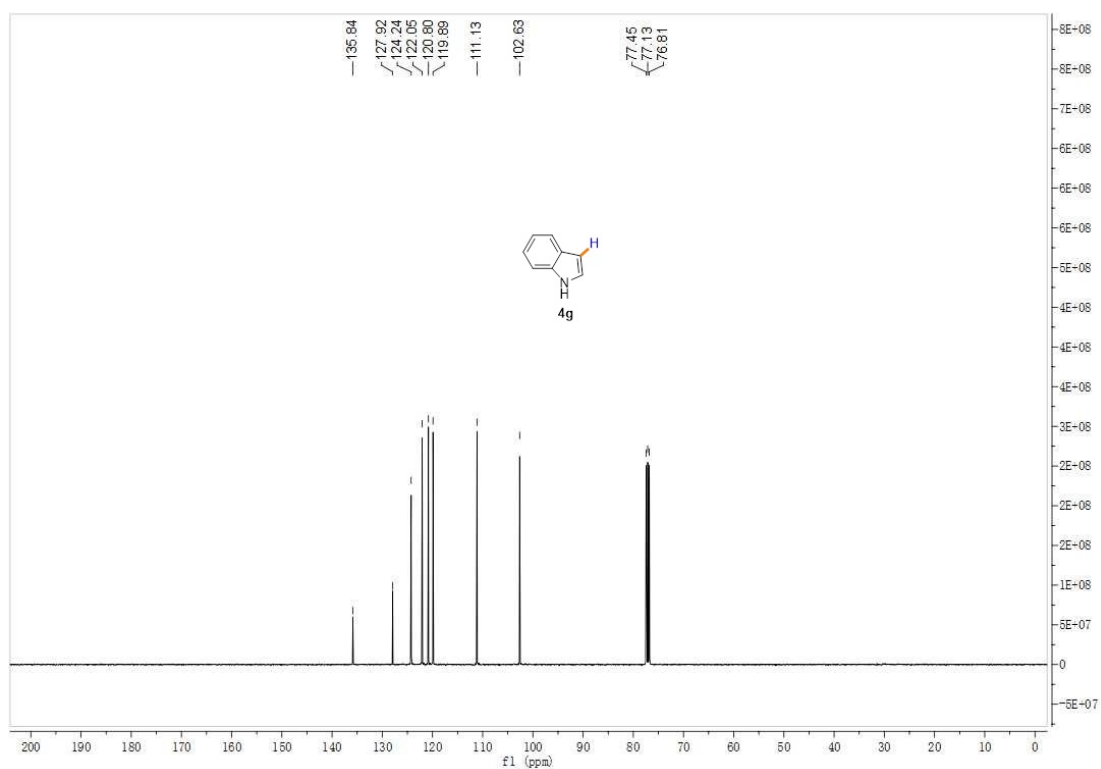



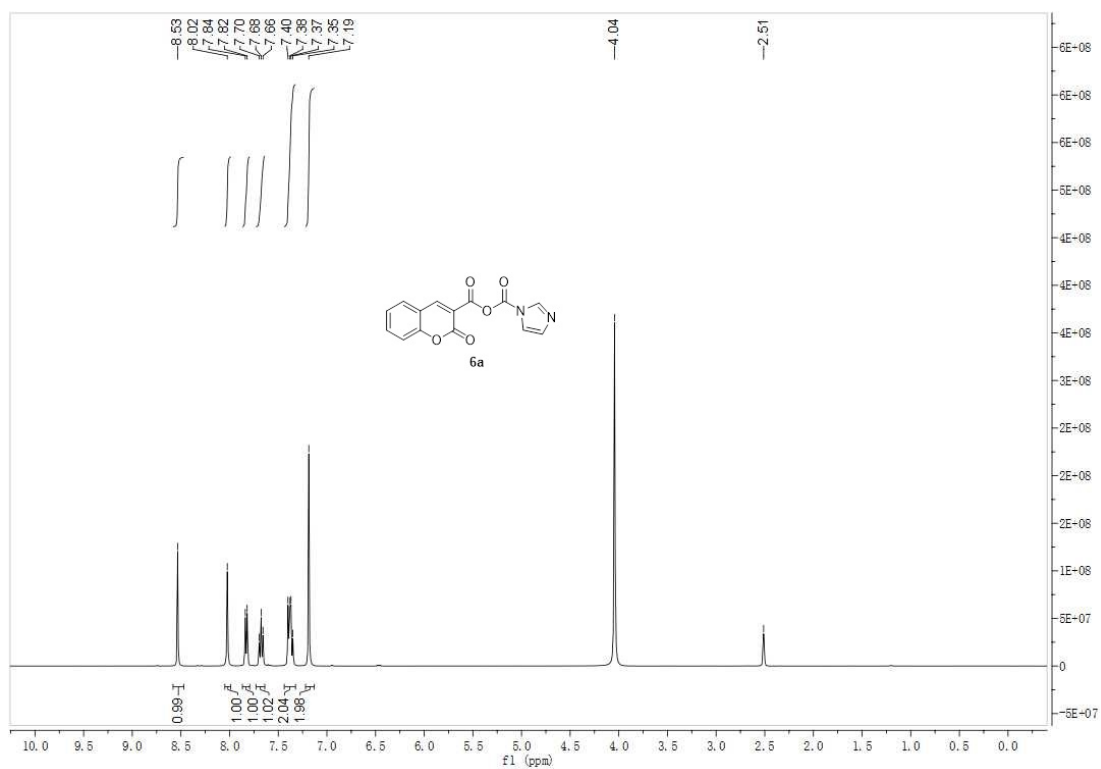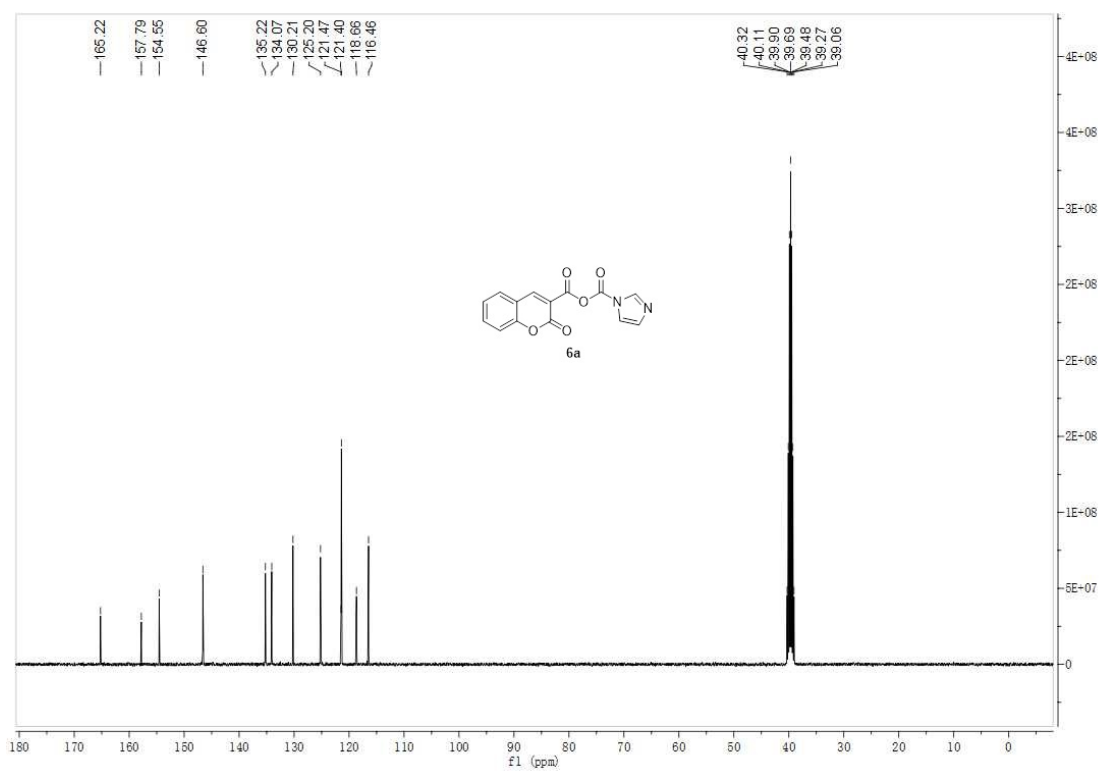

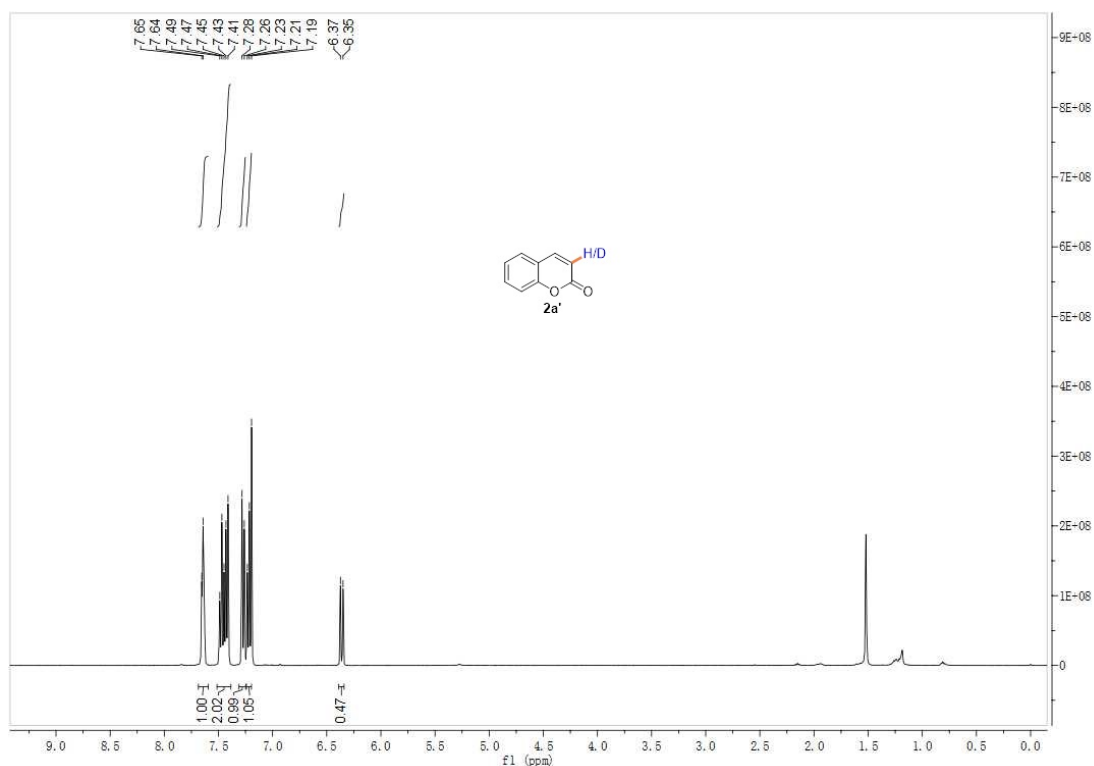

**6 Scanned copies of <sup>1</sup>H-NMR, for 2H-chromen-2-one (2a) (isolated from the experiment carried out in the presence of TEMPO, BHT, p-benzoquinone as a radical scavenger)**

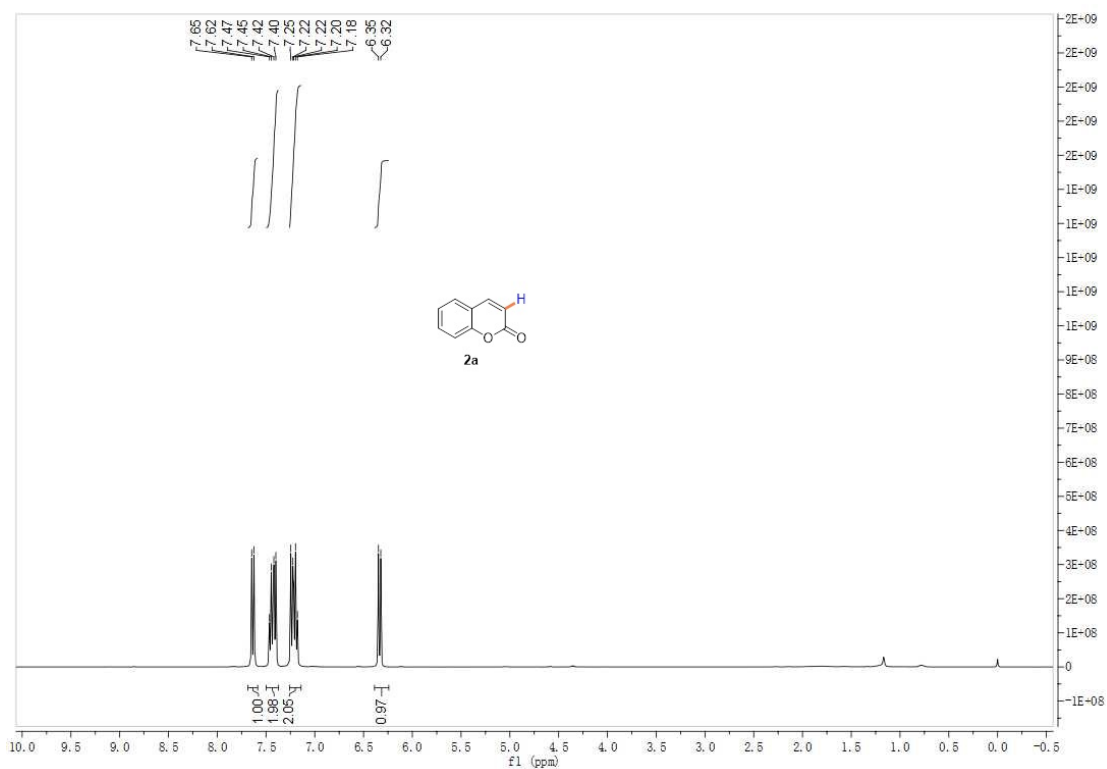

(Isolated from the experiment carried out in the presence of TEMPO as a radical scavenger)

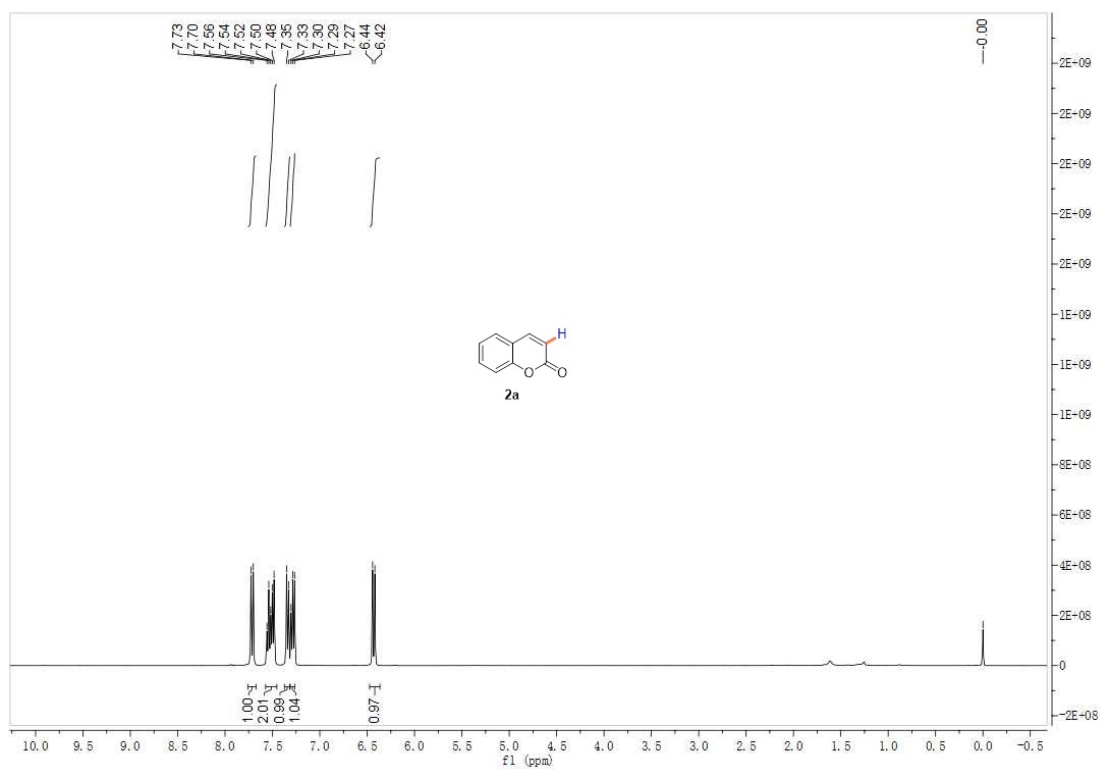

(Isolated from the experiment carried out in the presence of BHT as a radical scavenger)

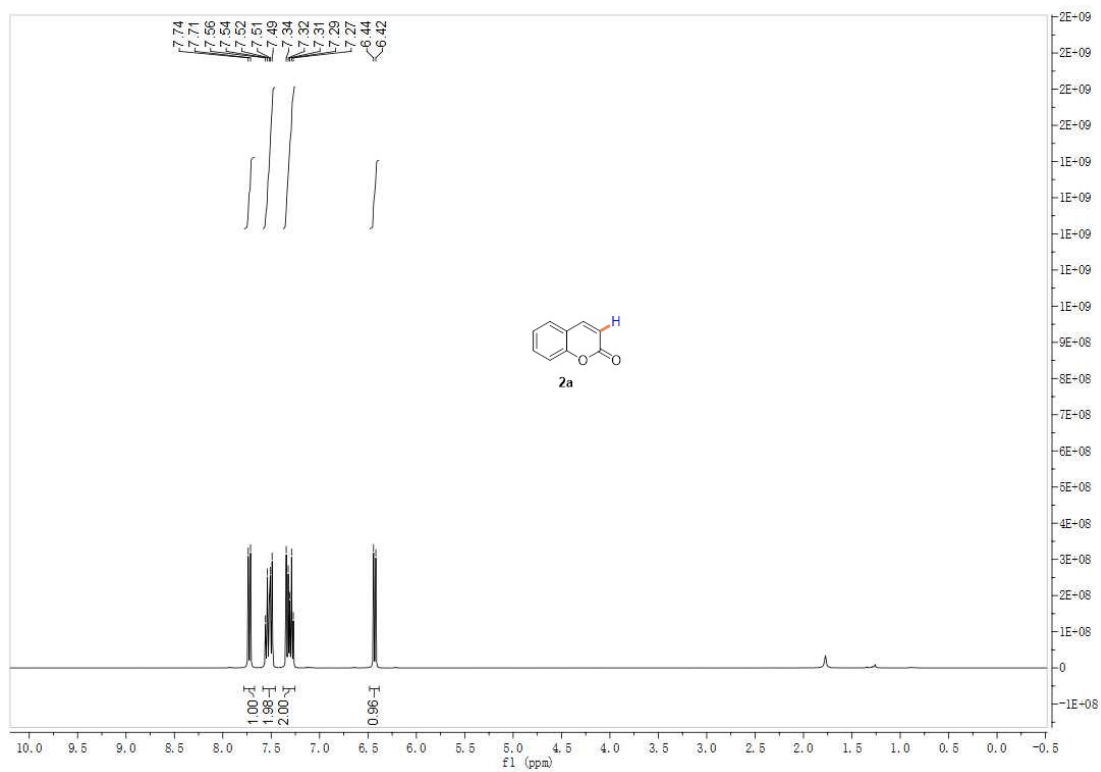

(Isolated from the experiment carried out in the presence of p-benzoquinone as a radical scavenger)
